# Supplementary material for: 17β-Estradiol Suppresses Gastric Inflammatory and Apoptotic Stress Responses and Restores nNOS-Mediated Gastric Emptying in Streptozotocin (STZ)-Induced Diabetic Female Mice
Source: MDPI journal article supplement (doi:10.3390/antiox12030758), 2023-03-20

# Supplementary files

Sprouse et al

**Figure S2D**  
**ER  $\alpha$**

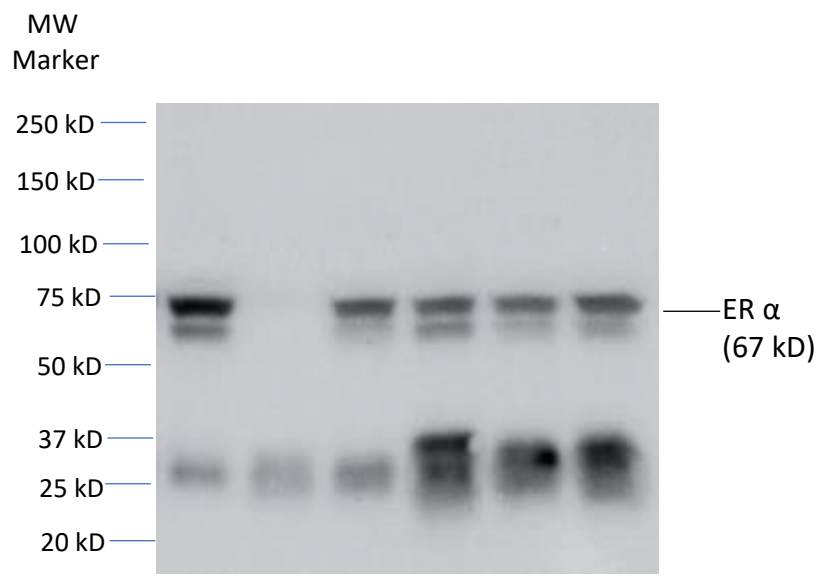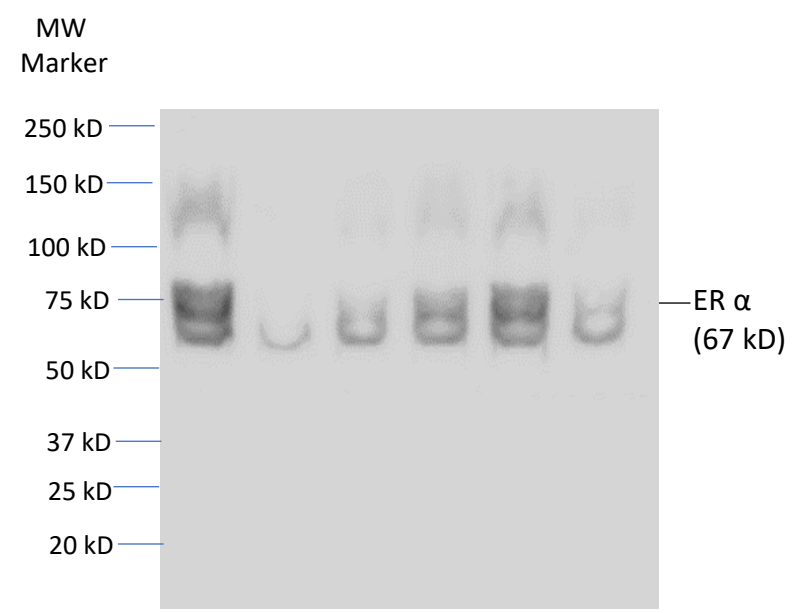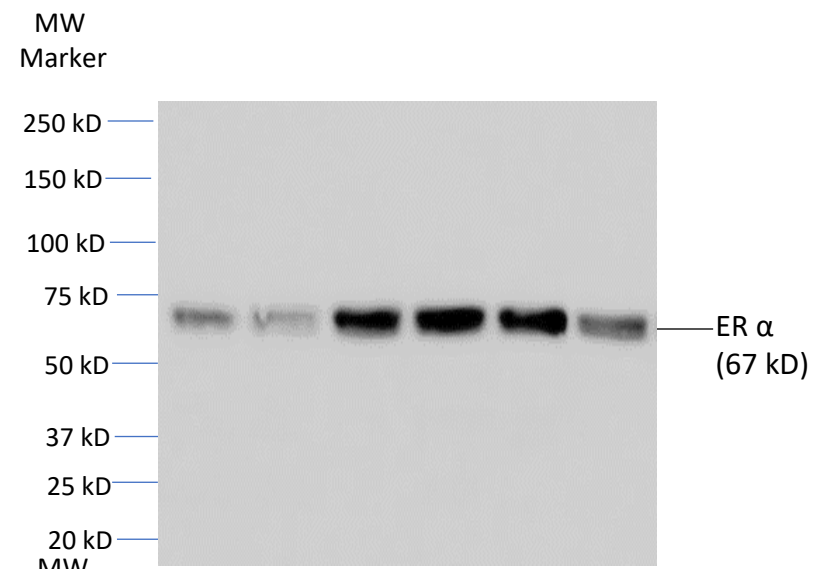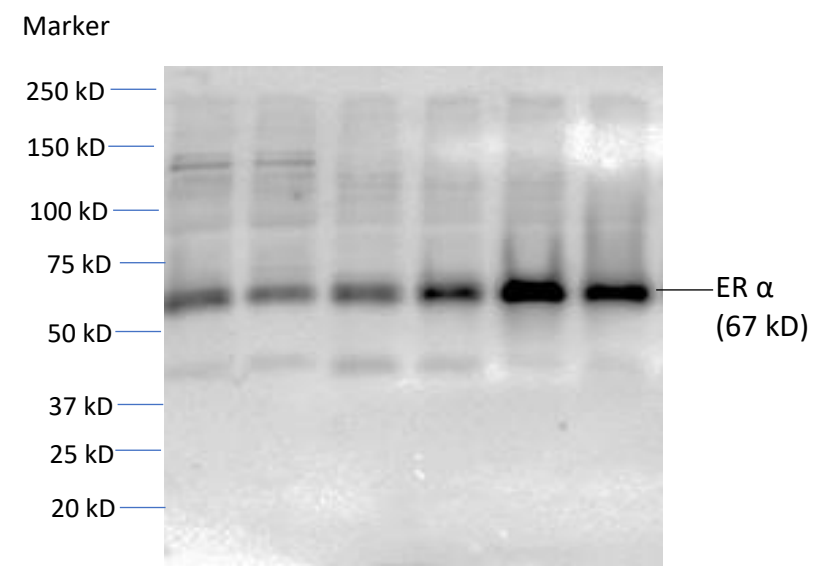

**Figure S2D**  
 **$\beta$ -Actin for Er  $\alpha$**

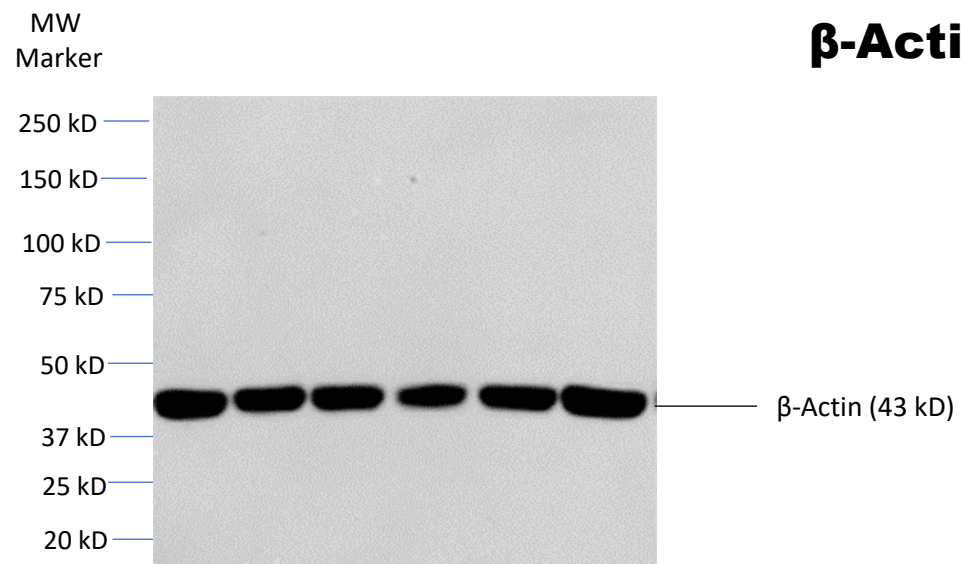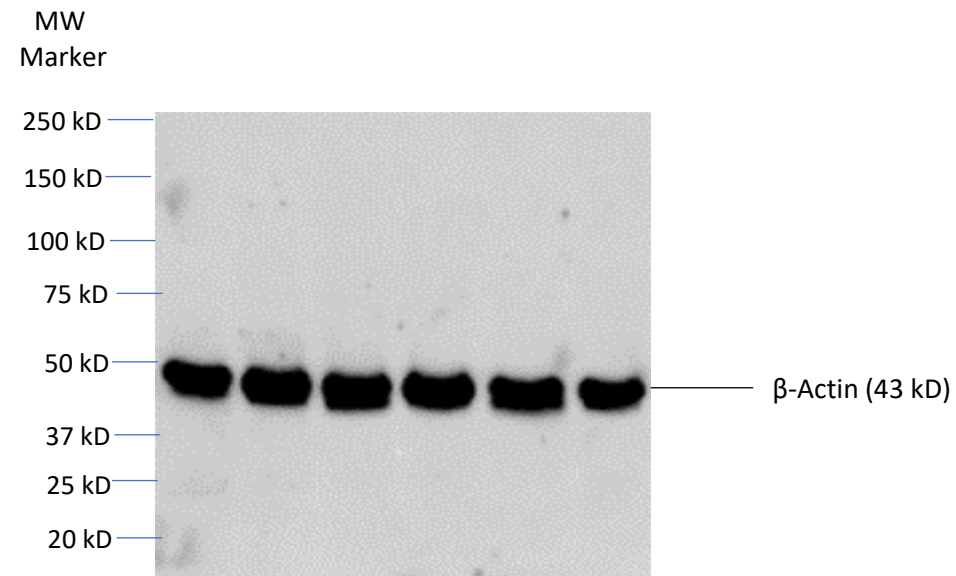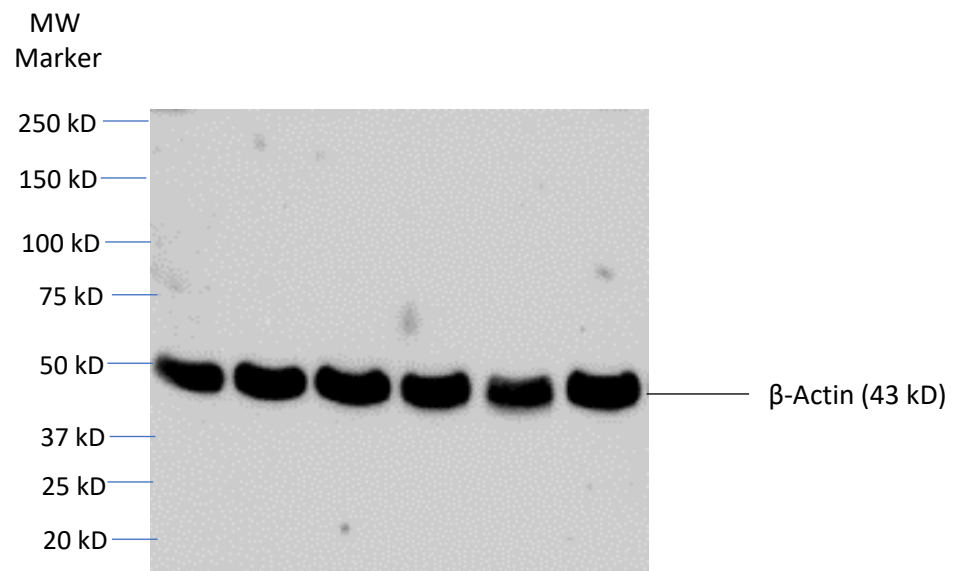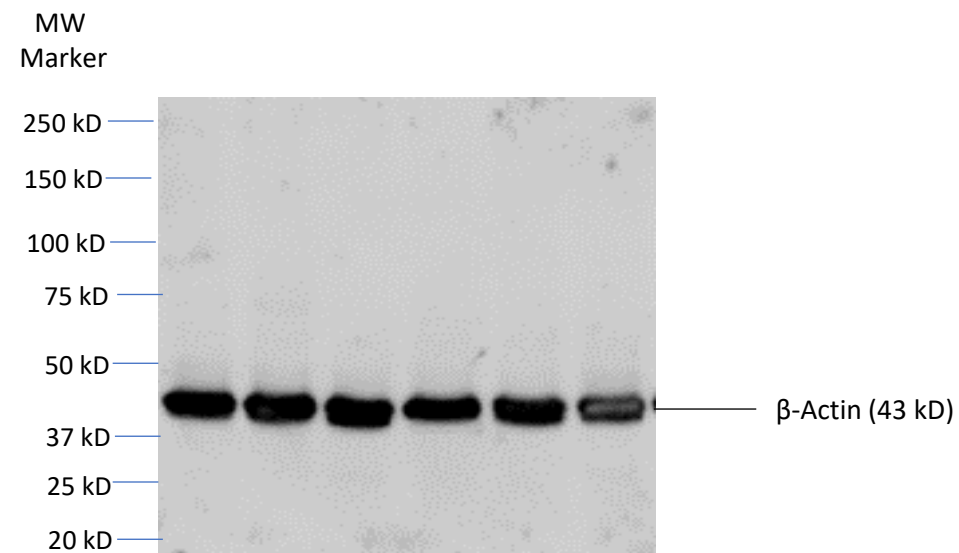

**Figure S2E**  
**ER  $\beta$**

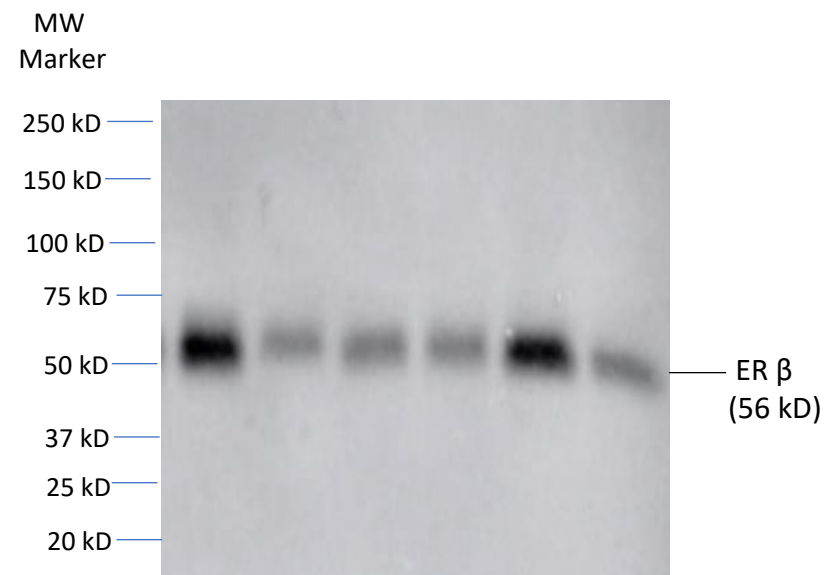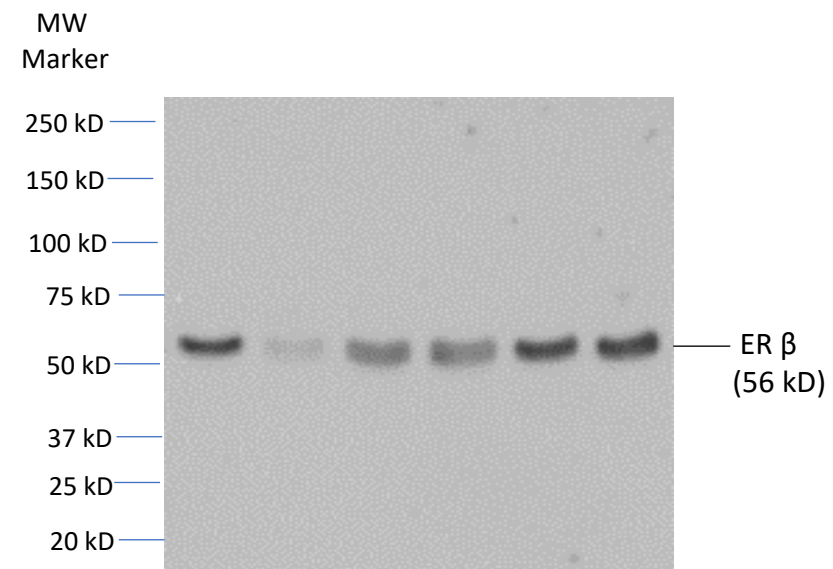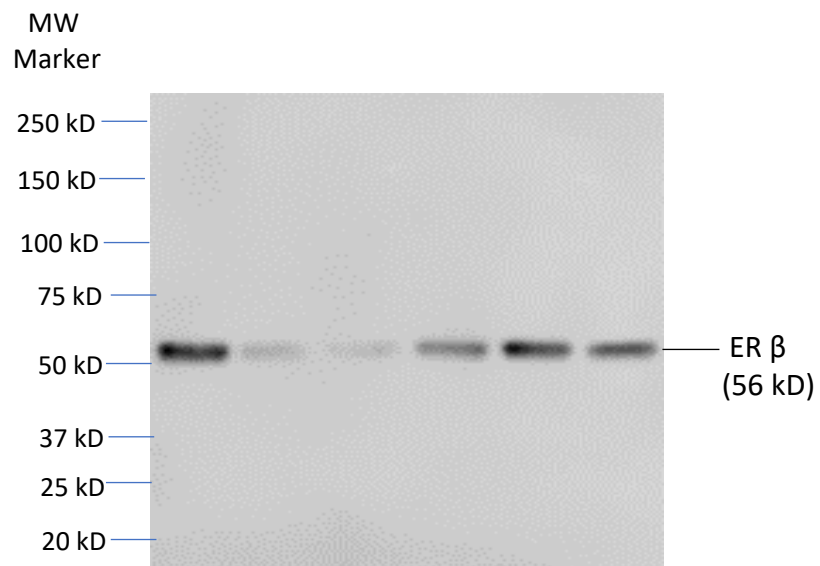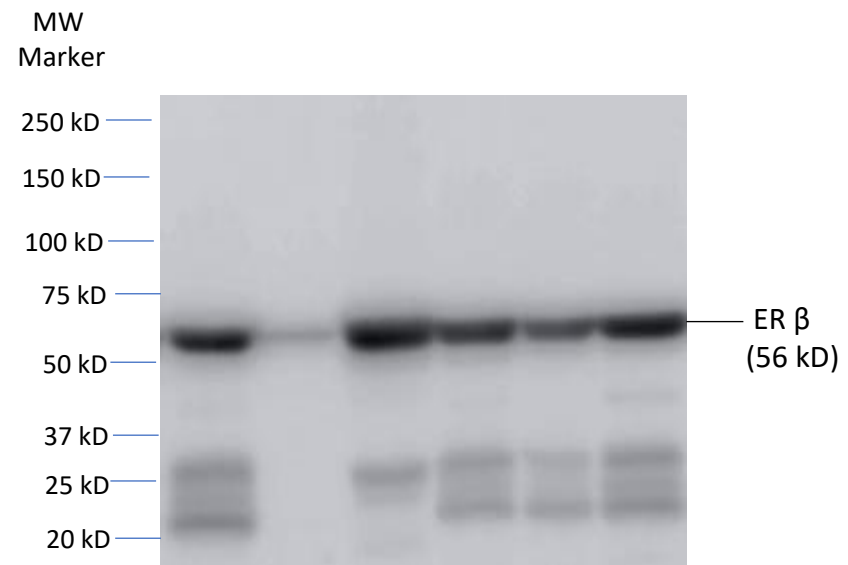

**Figure S2E**  
 **$\beta$ -Actin for Er  $\beta$**

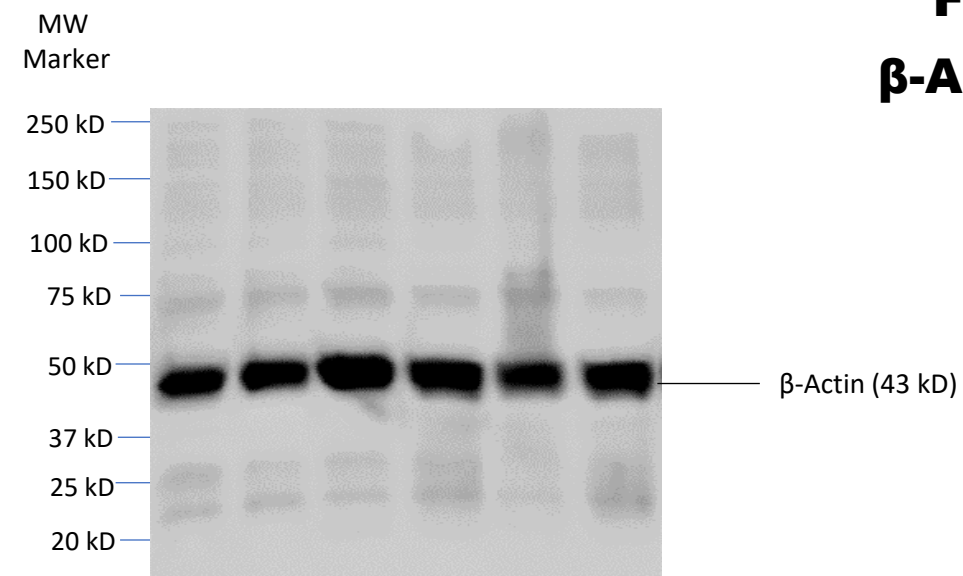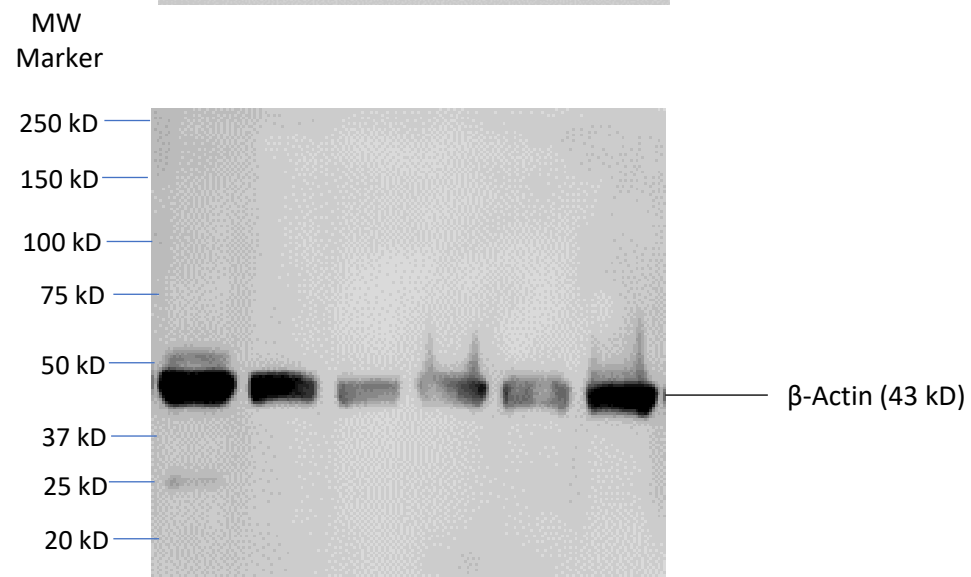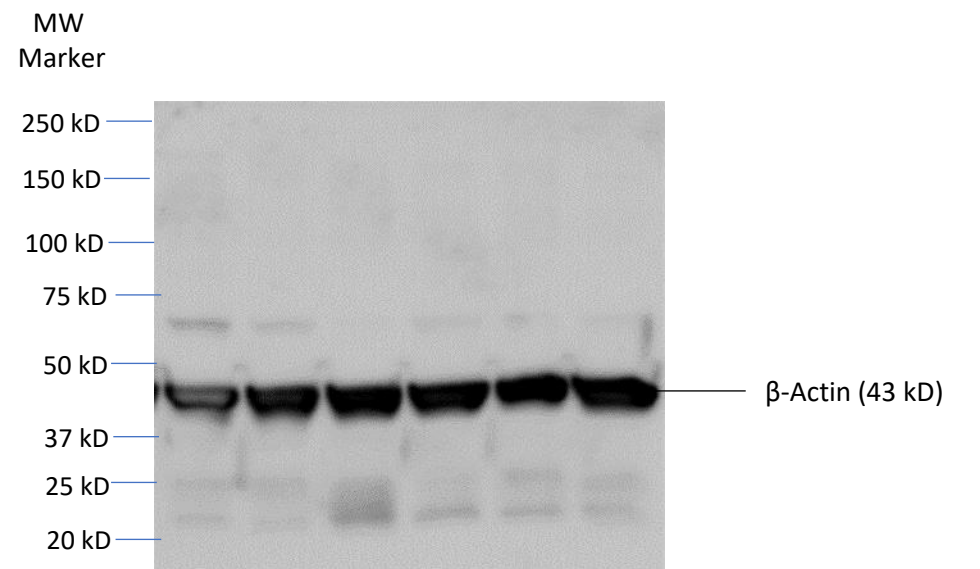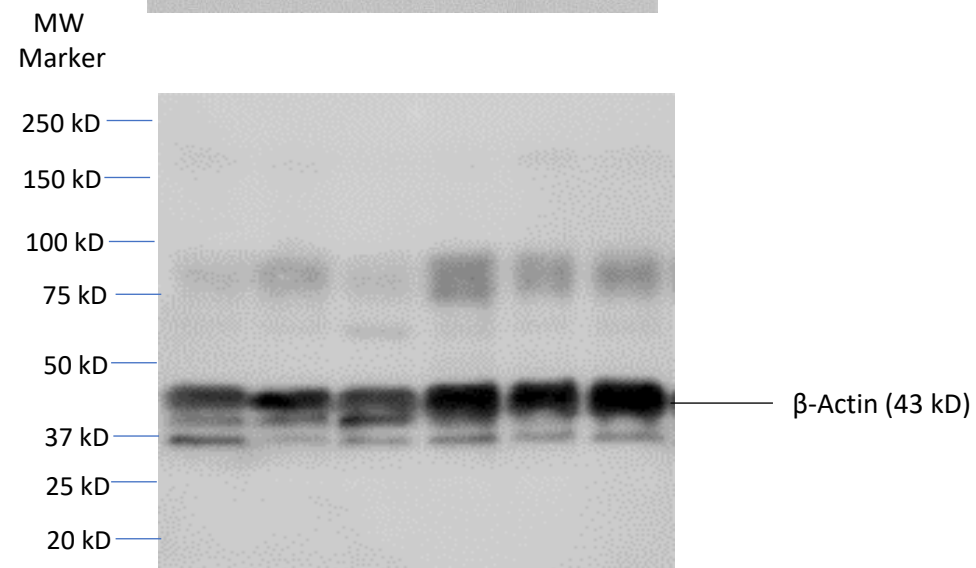

**Figure S2F**  
**p<sup>38</sup>MAPK**

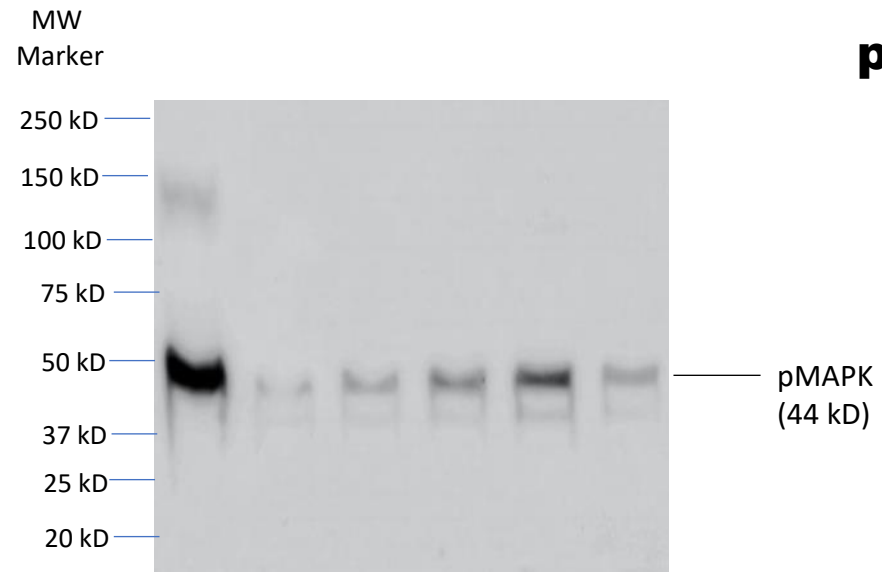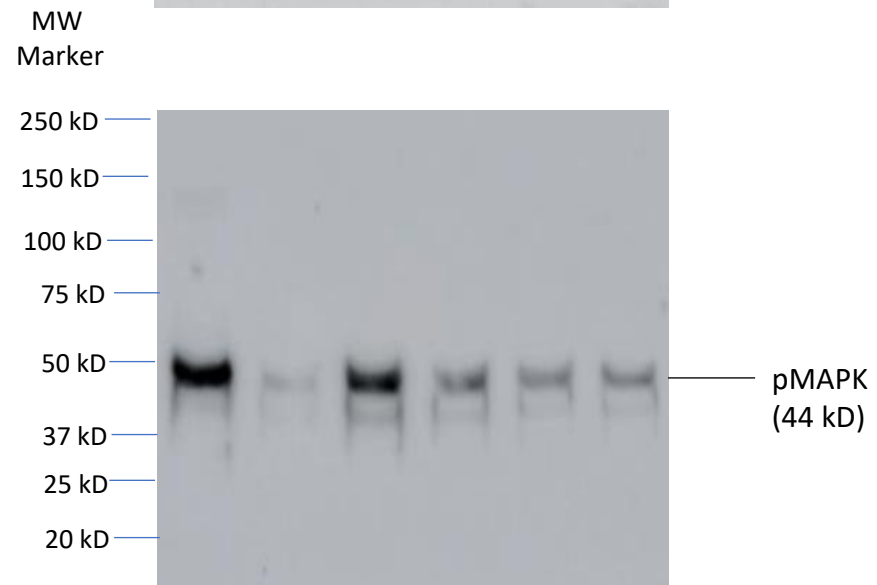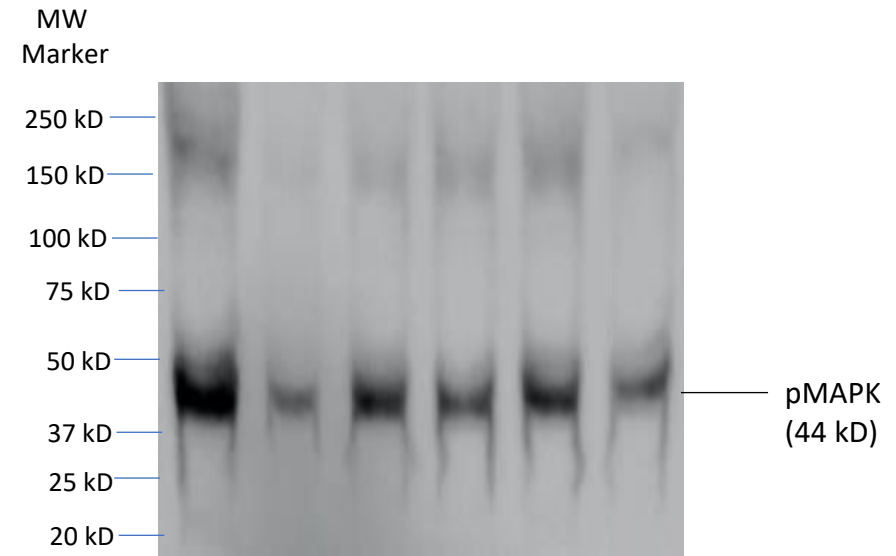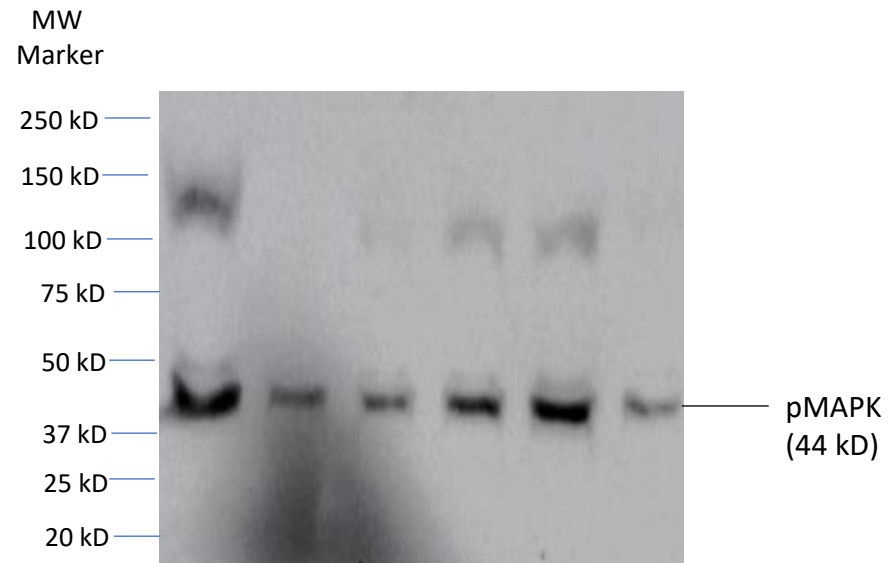

**Figure S2F**  
 **$\beta$ -Actin for p<sup>38</sup>MAPK**

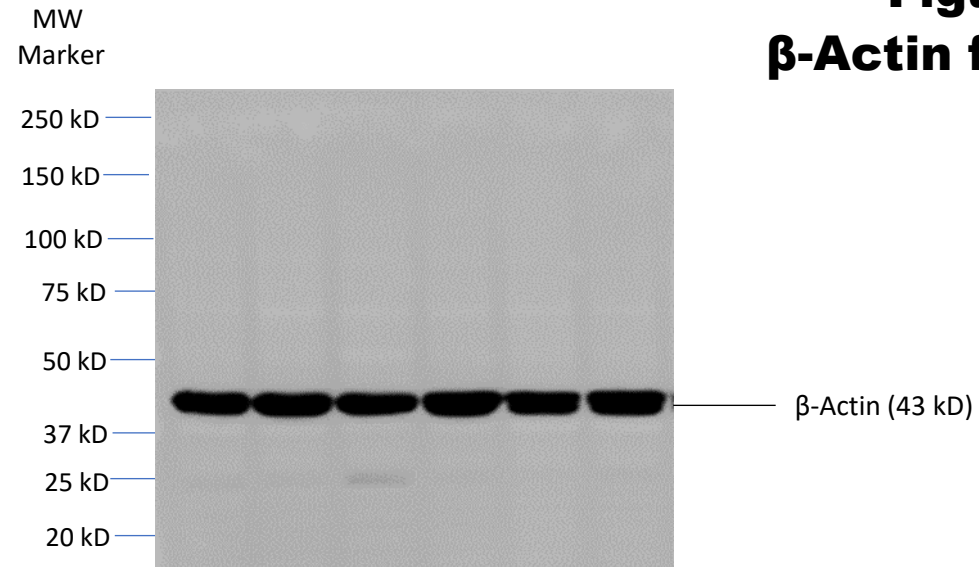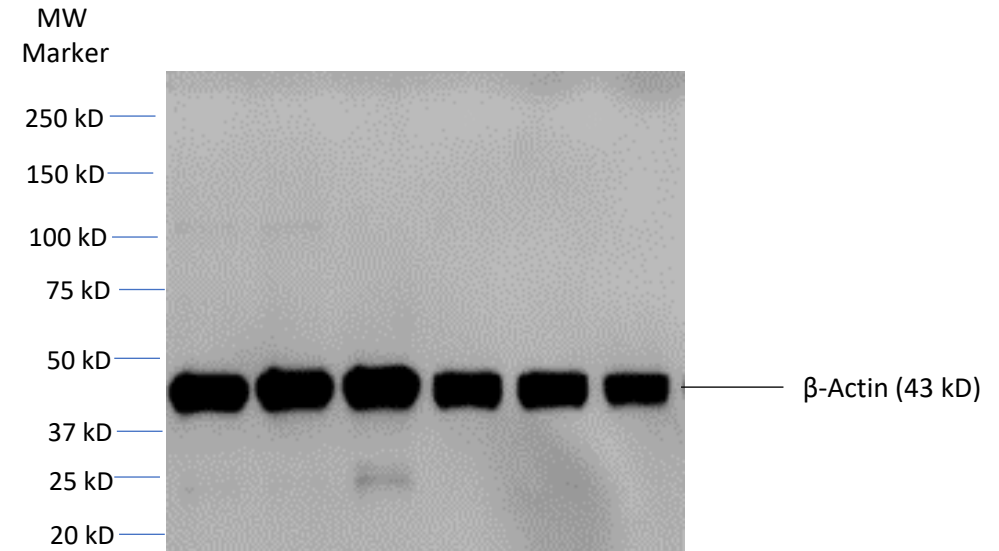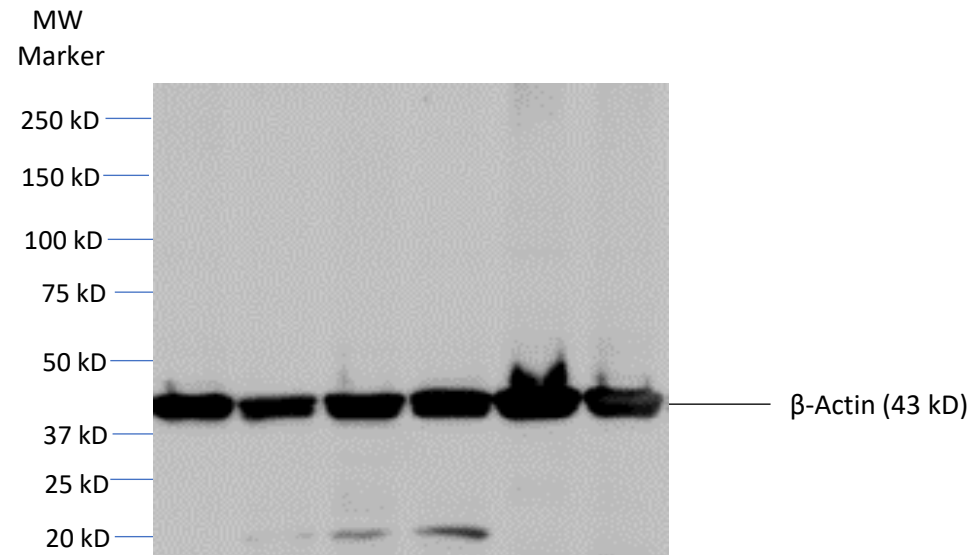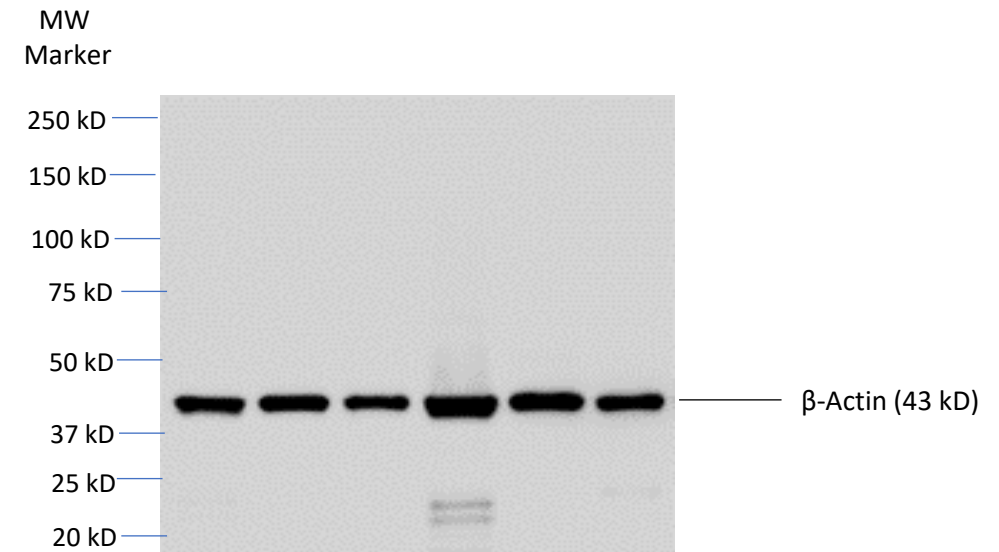

**Figure S3C**

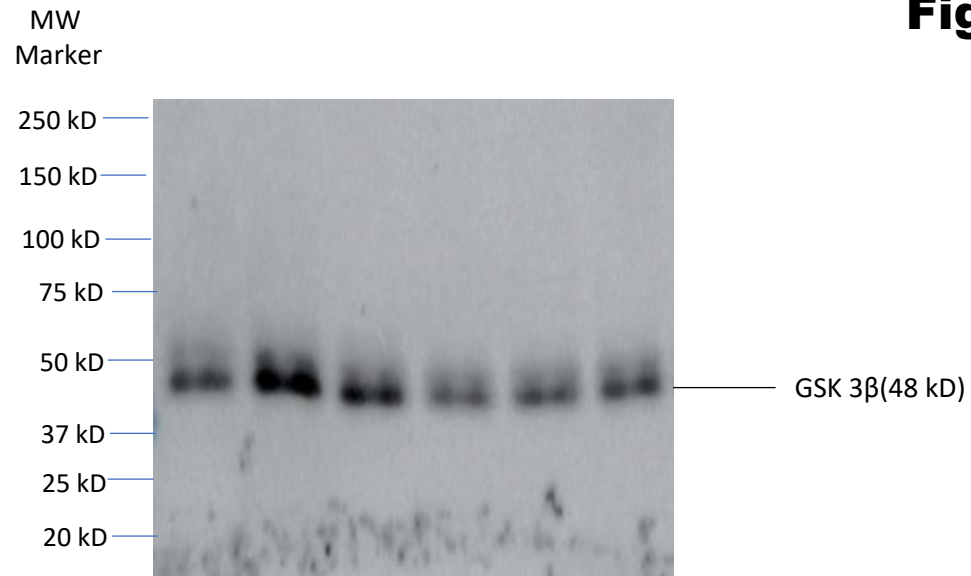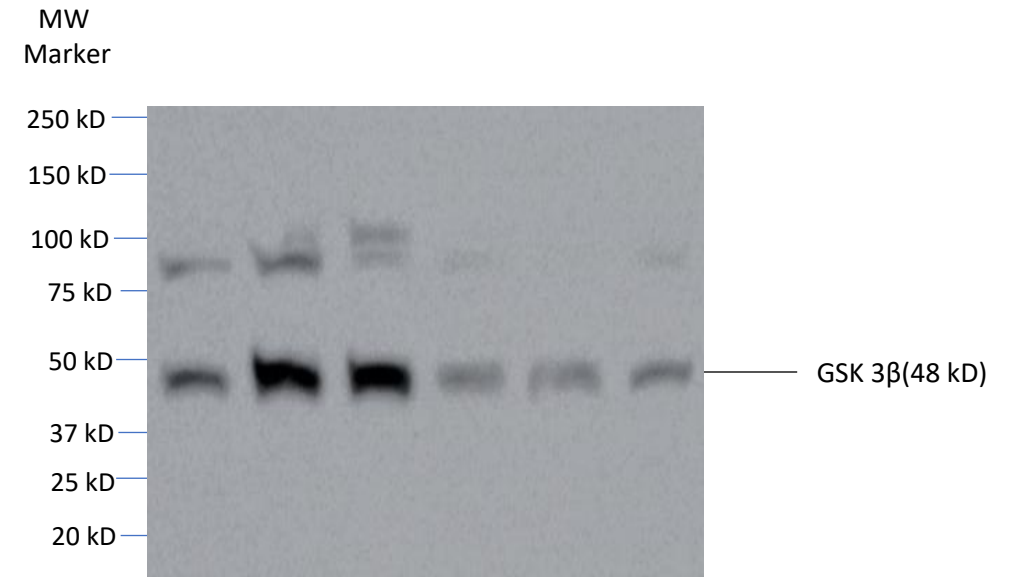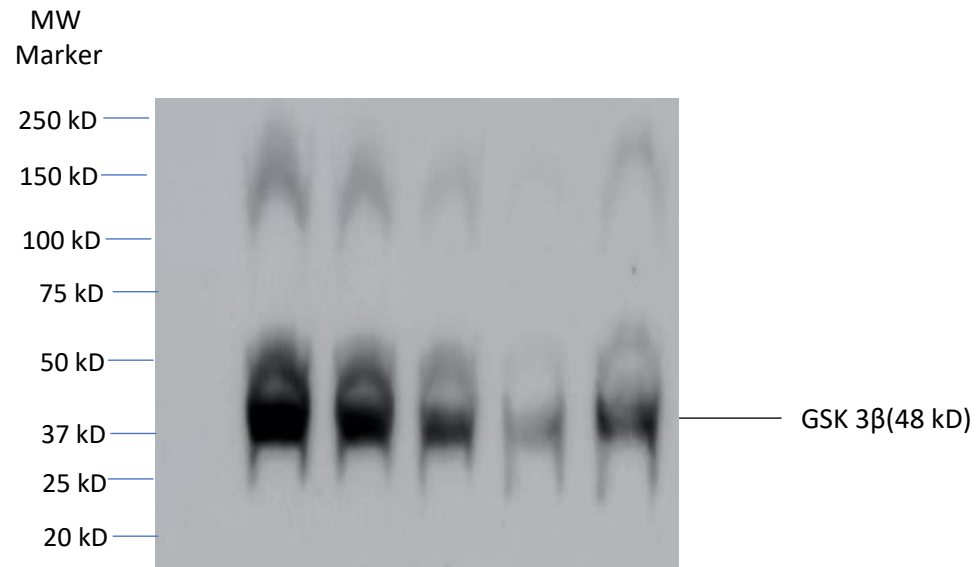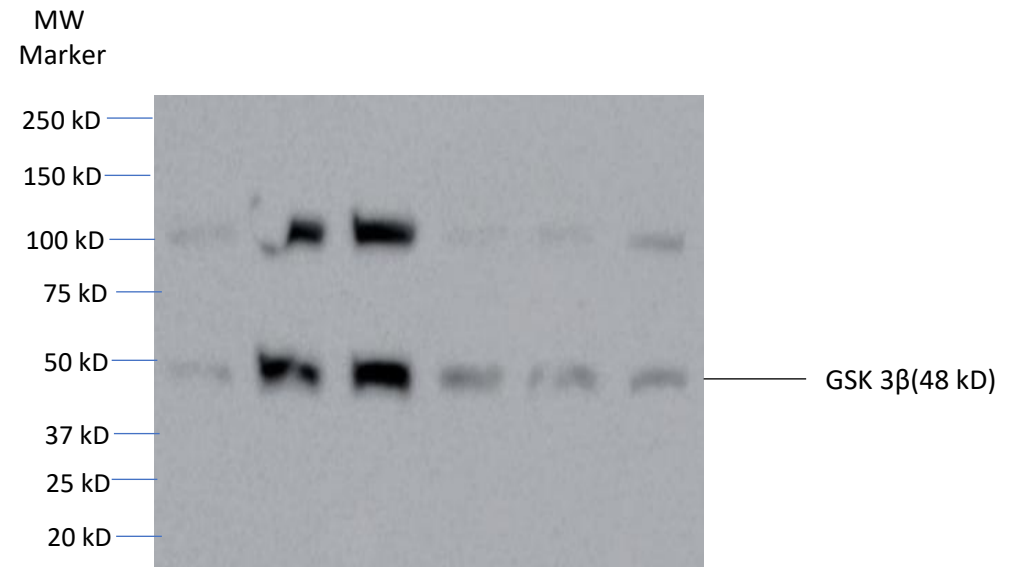



**Figure S3C**  
 **$\beta$ -Actin for GSK-3 $\beta$**

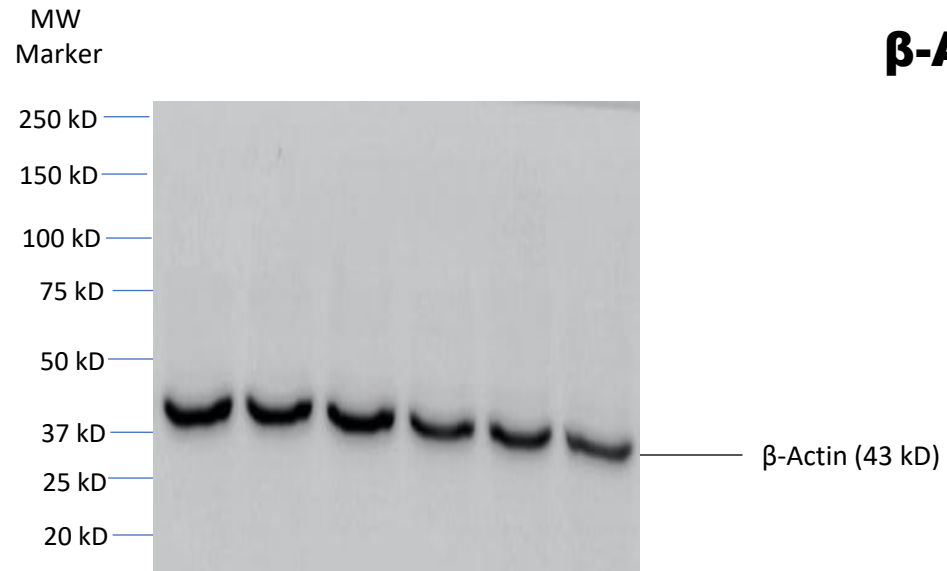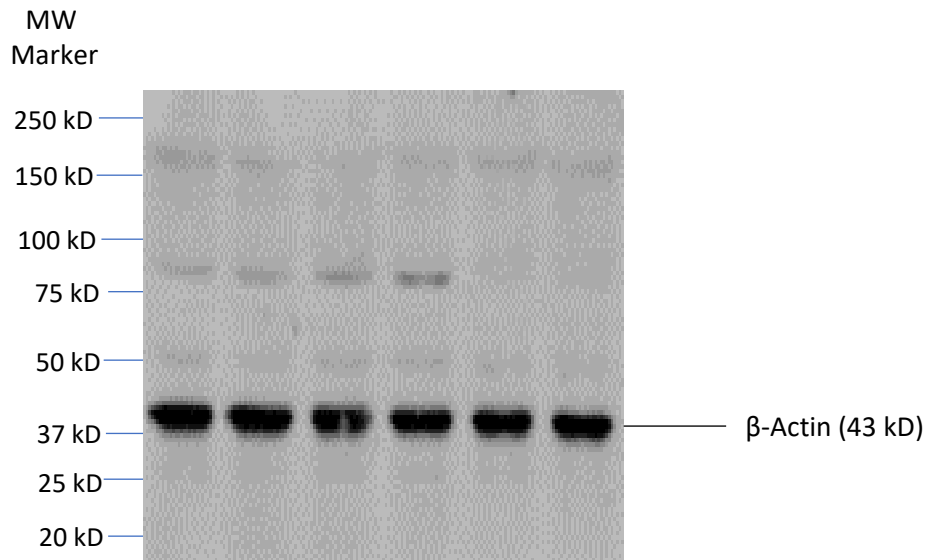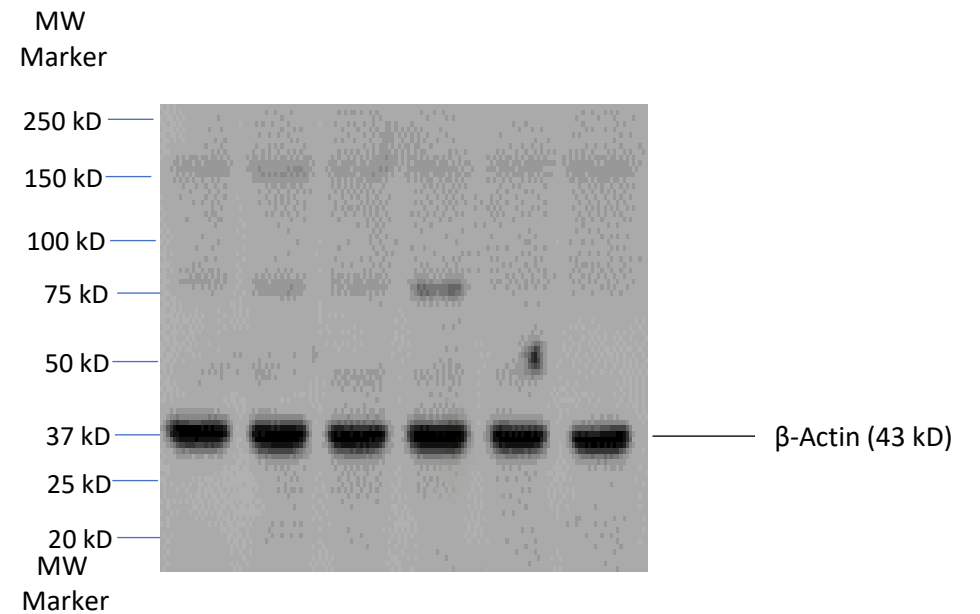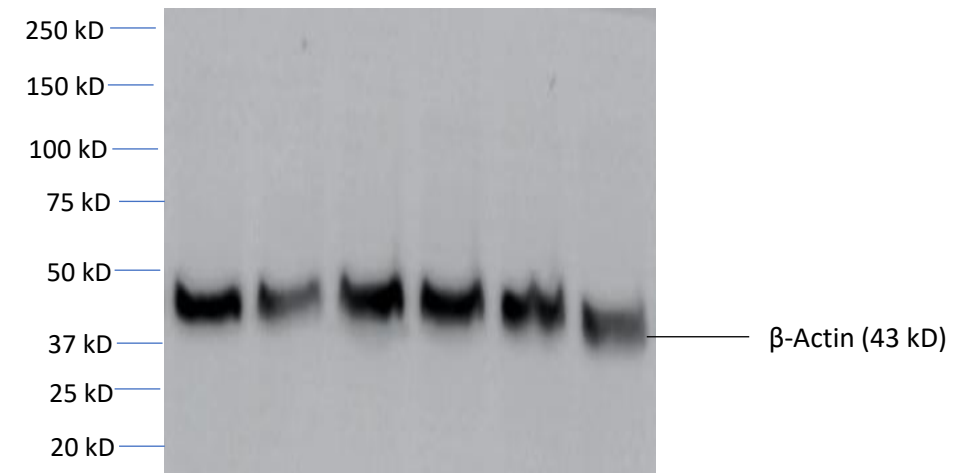

**Figure S3D**  
**Cytosolic Nrf2**

MW  
Marker

250 kD

150 kD

100 kD

75 kD

50 kD

37 kD

25 kD

20 kD

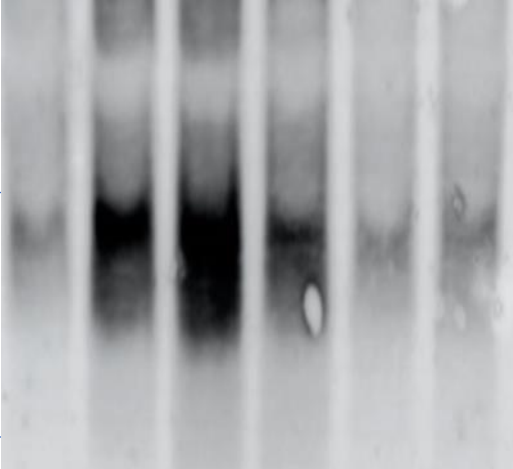

Nrf2  
(57 kD)

MW  
Marker

250 kD

150 kD

100 kD

75 kD

50 kD

37 kD

25 kD

20 kD

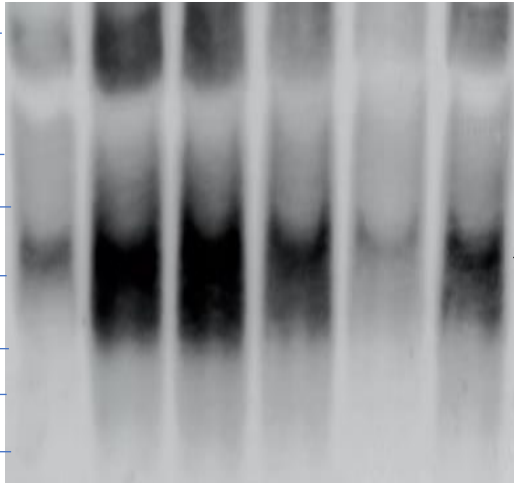

Nrf2  
(57 kD)

MW  
Marker

250 kD

150 kD

100 kD

75 kD

50 kD

37 kD

25 kD

20 kD

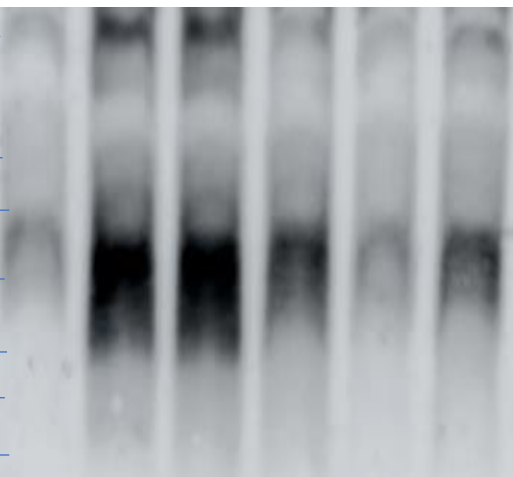

Nrf2  
(57 kD)

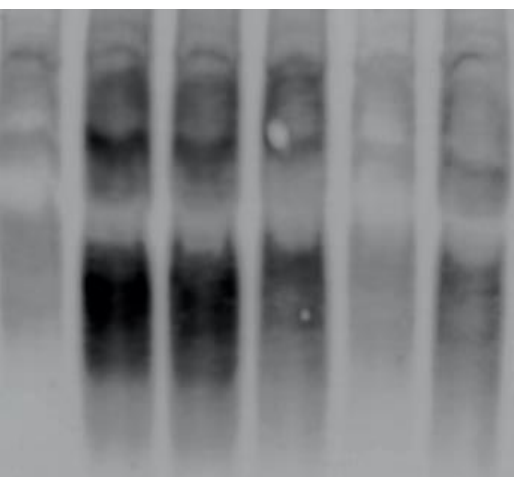

Nrf2  
(57 kD)

**Figure S3D**  
 **$\beta$ -Actin for Cytosolic Nrf2**

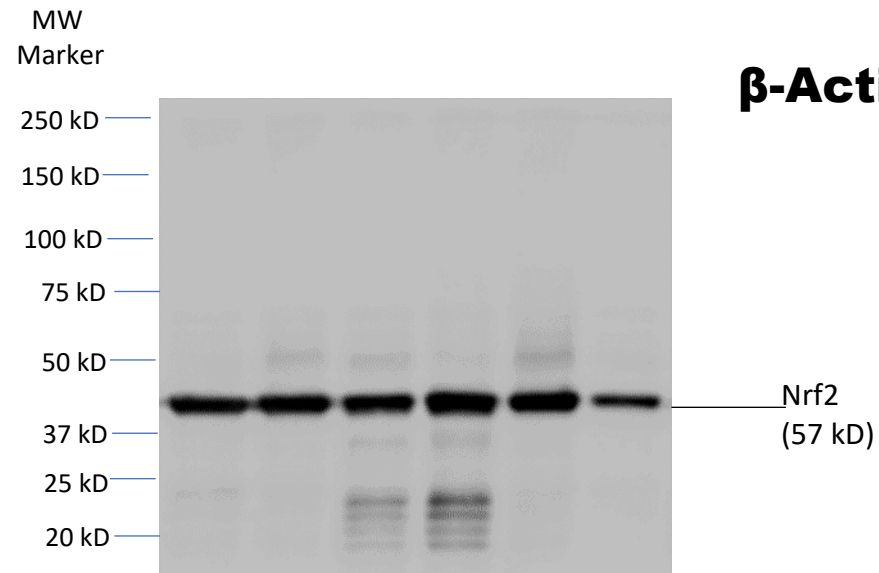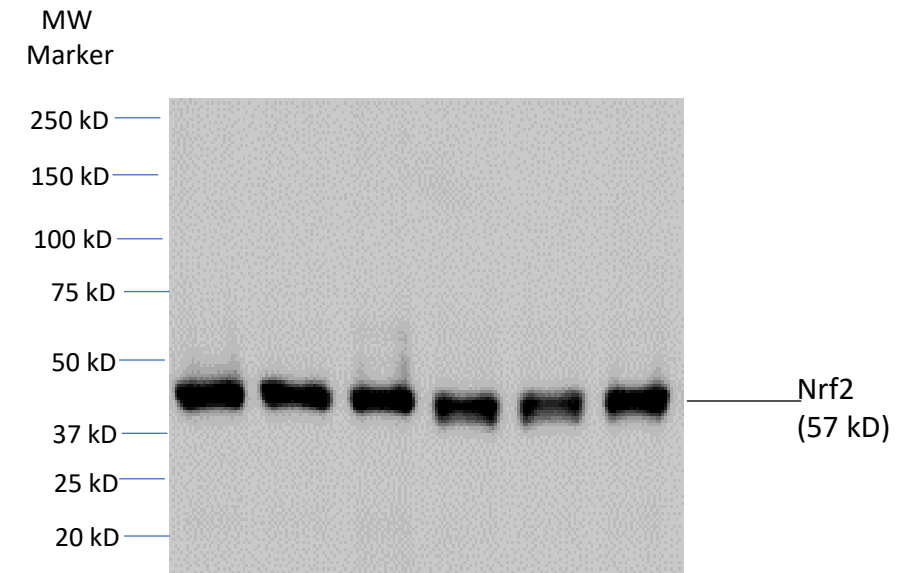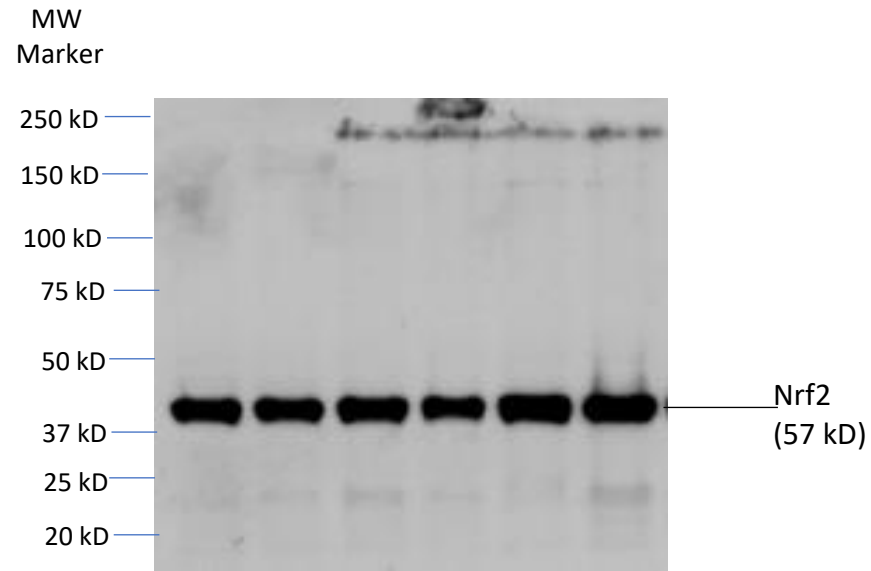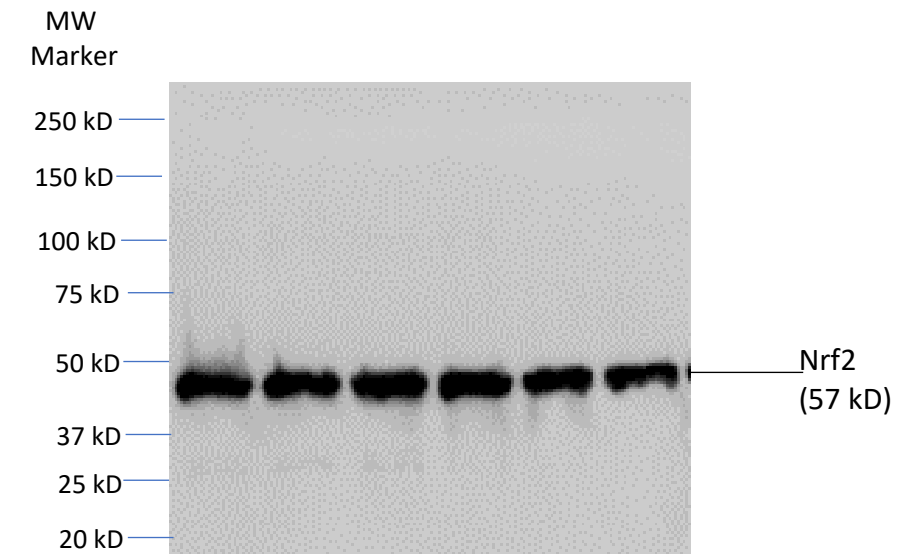

**Figure S3E**  
**Nuclear Nrf2**

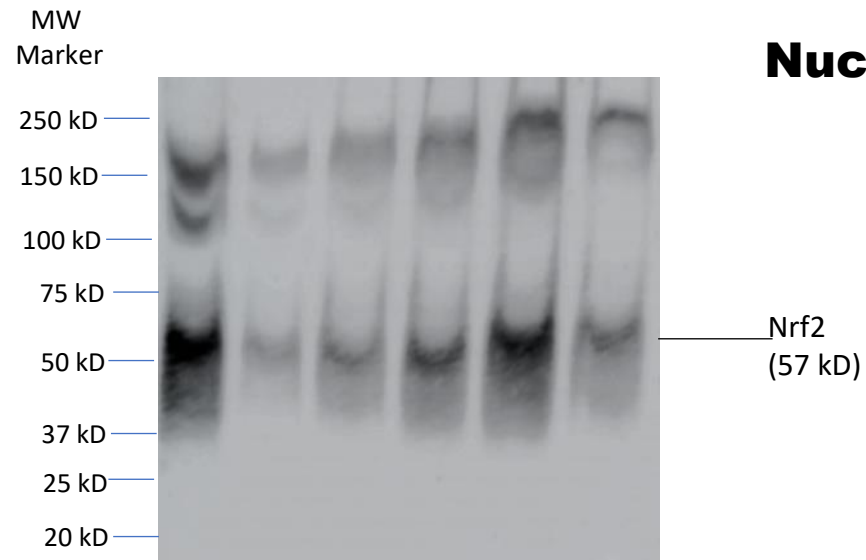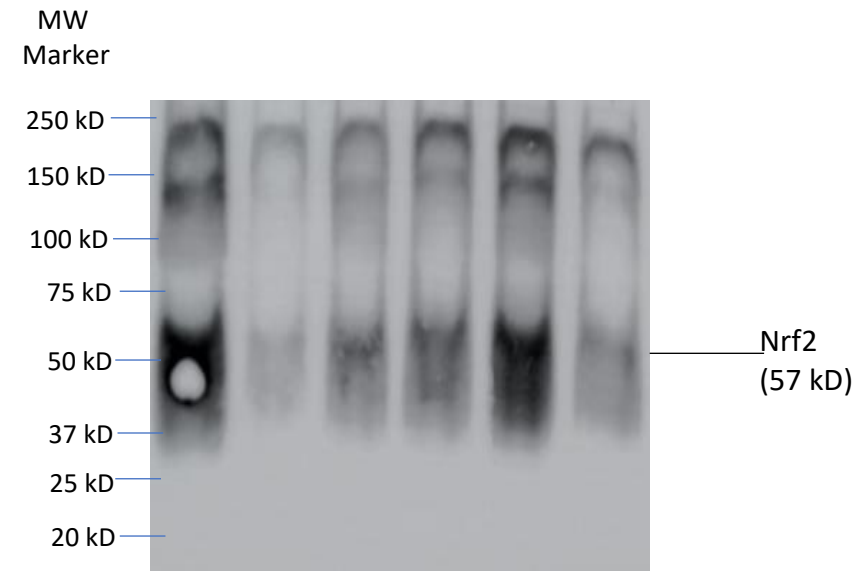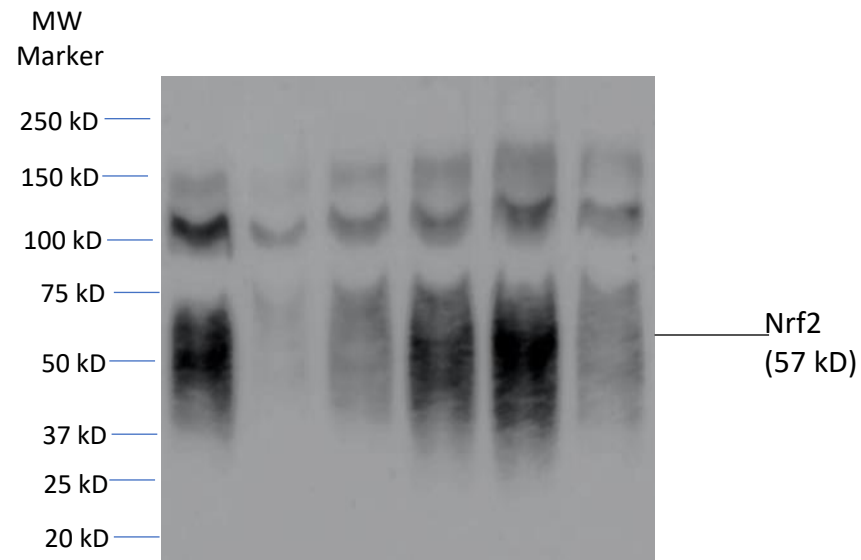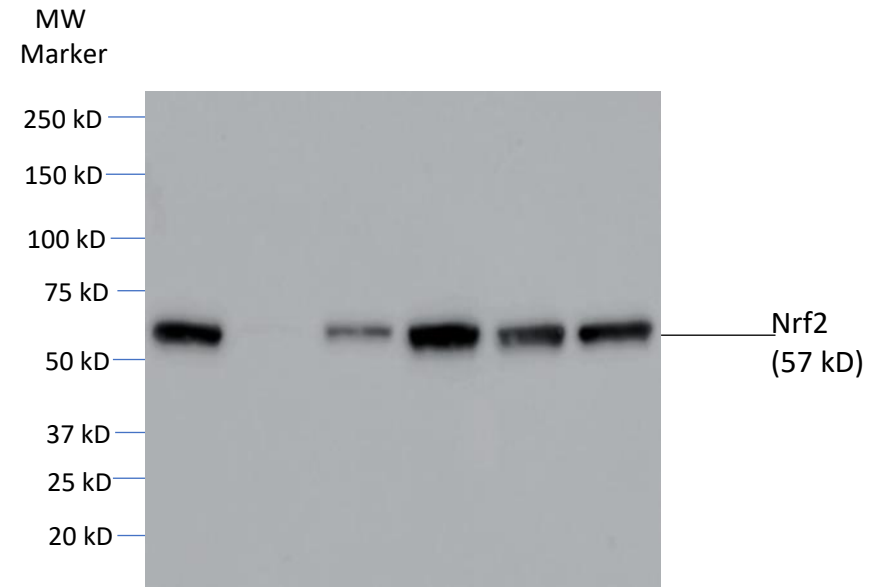

**Figure S3E**  
**Lamin B1 for Nuclear Nrf2**

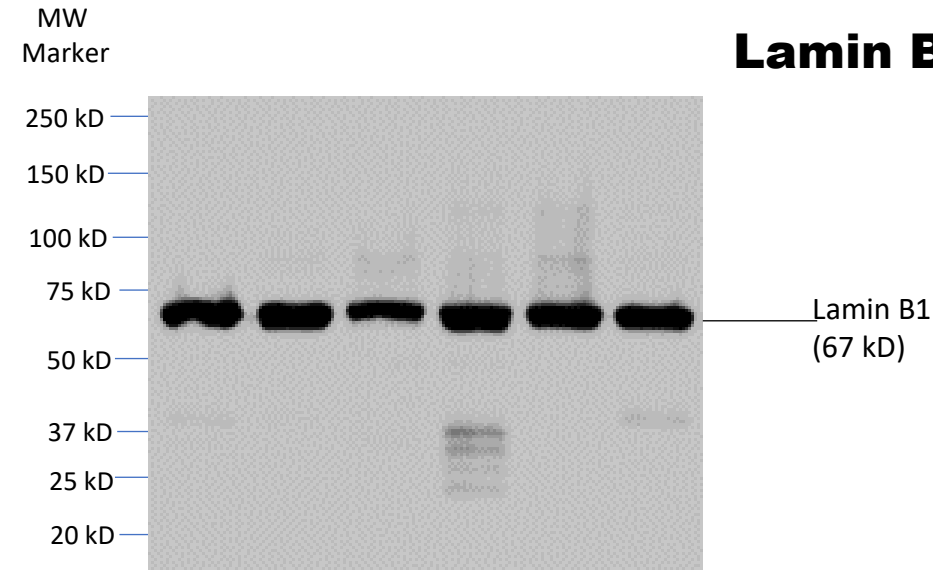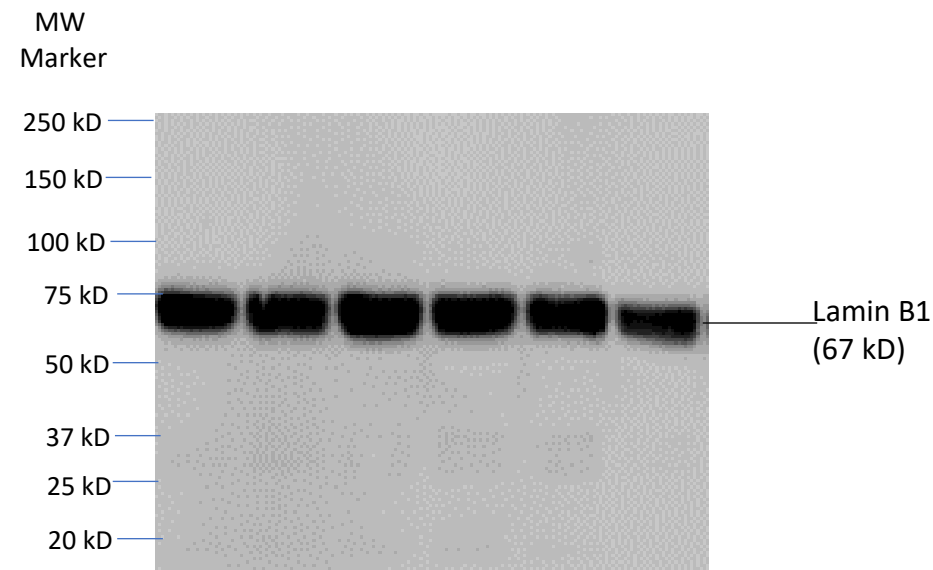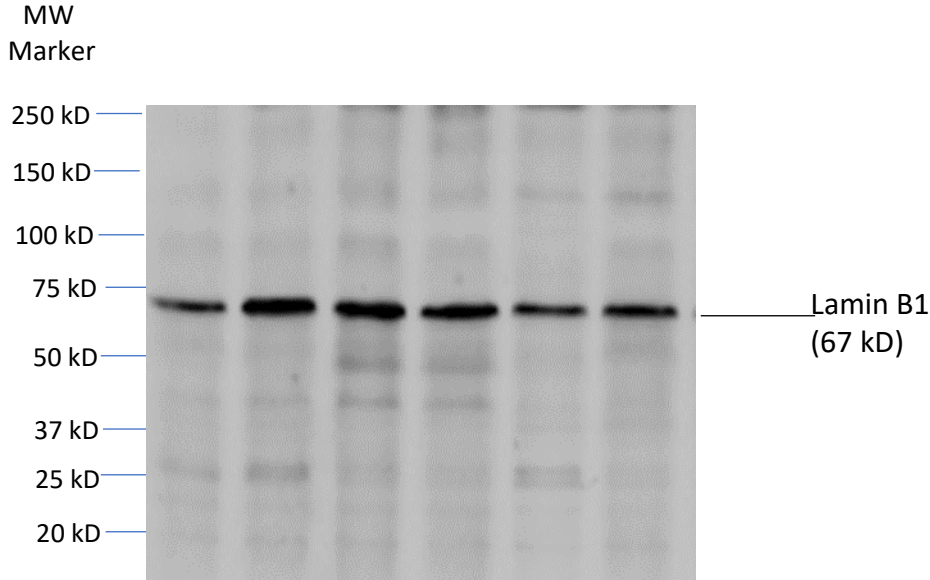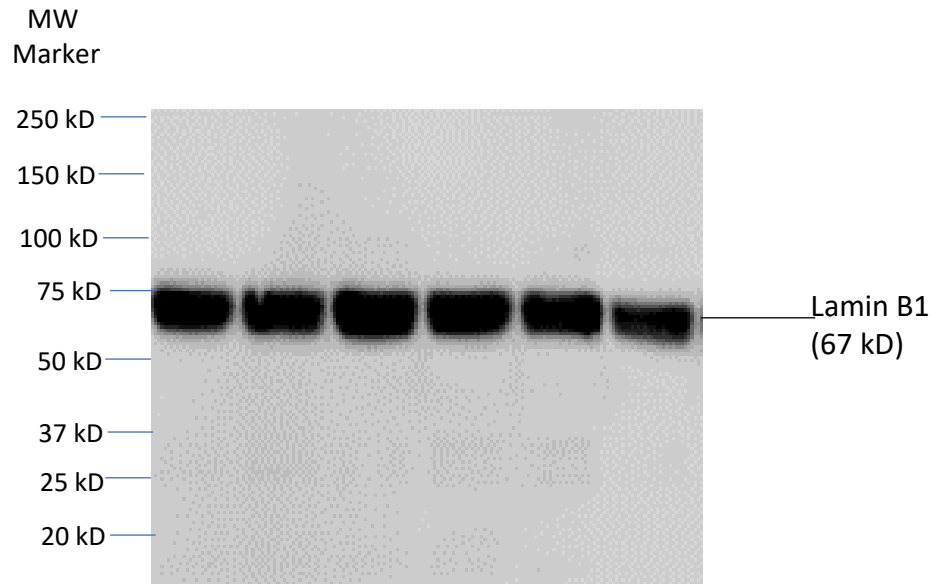

**Figure S3E**  
**GCLM**

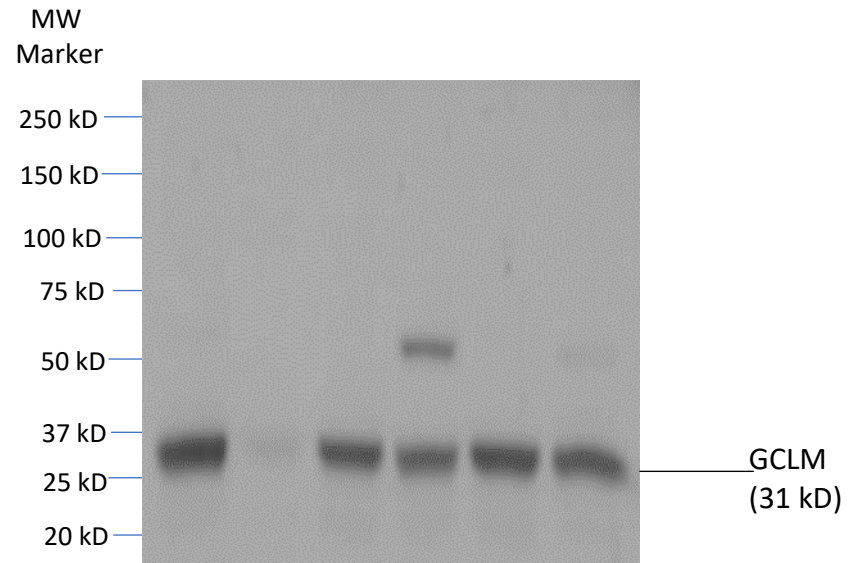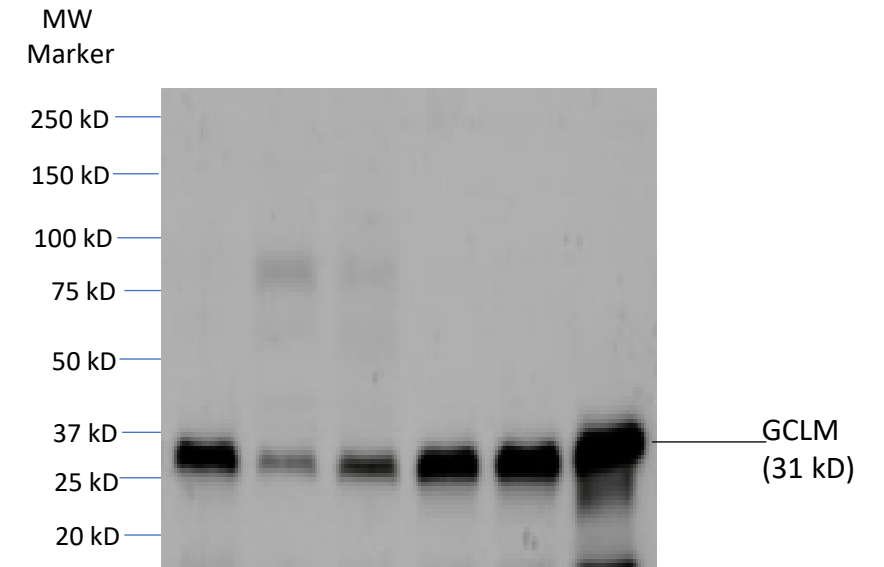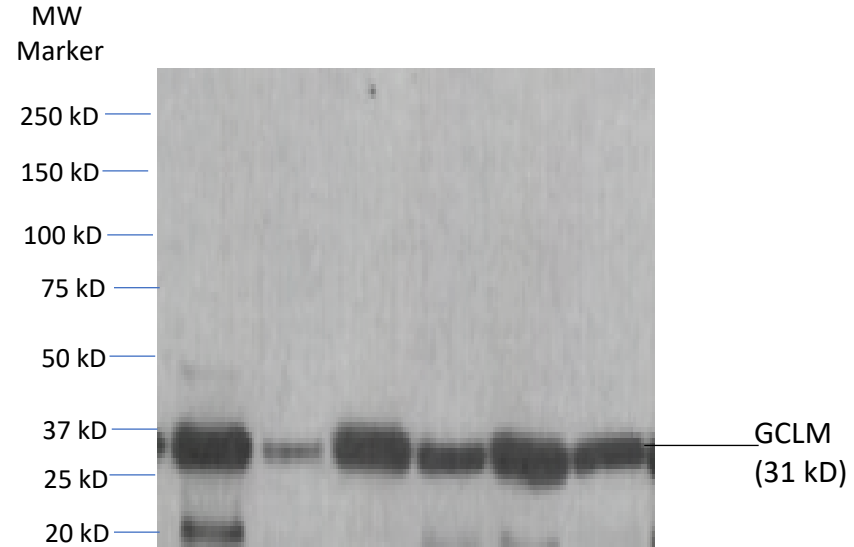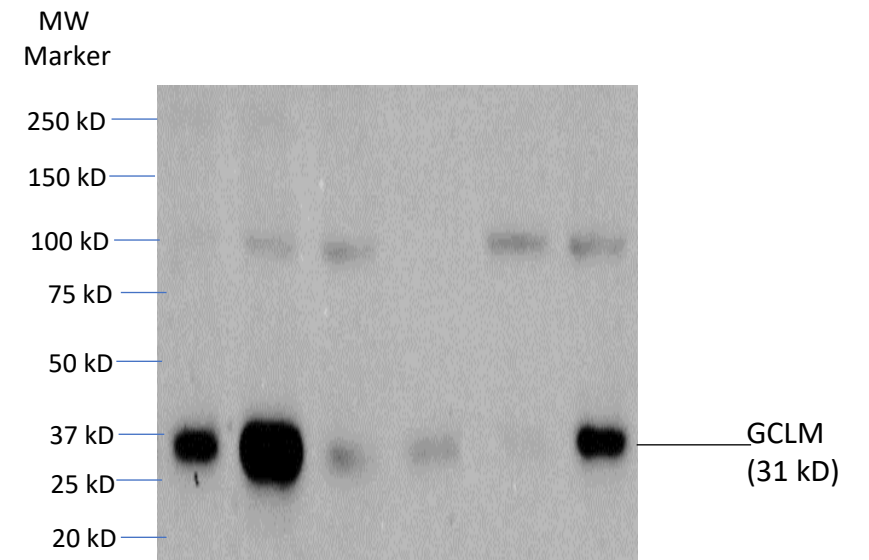

**Figure S3E**  
 **$\beta$ -Actin for GCLM**

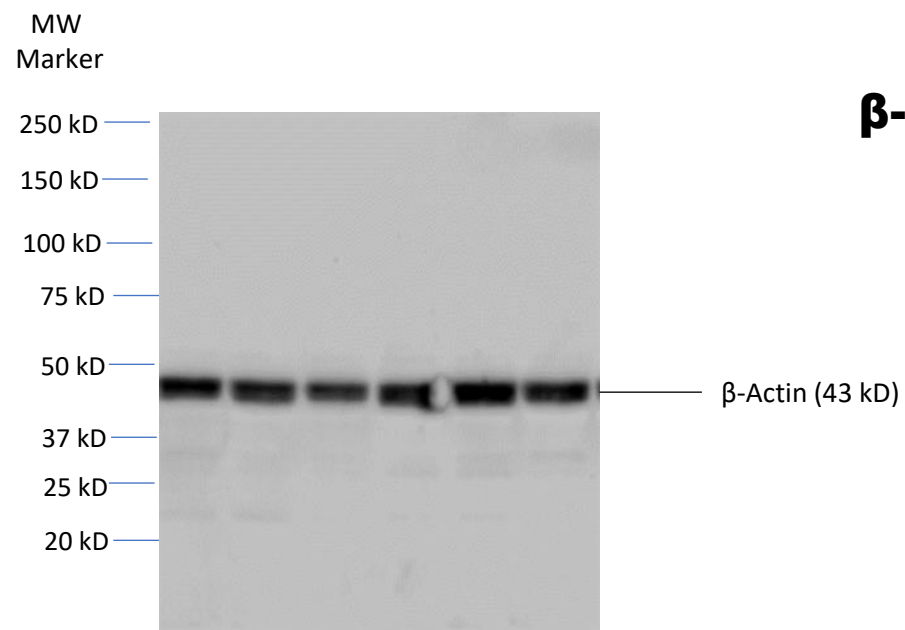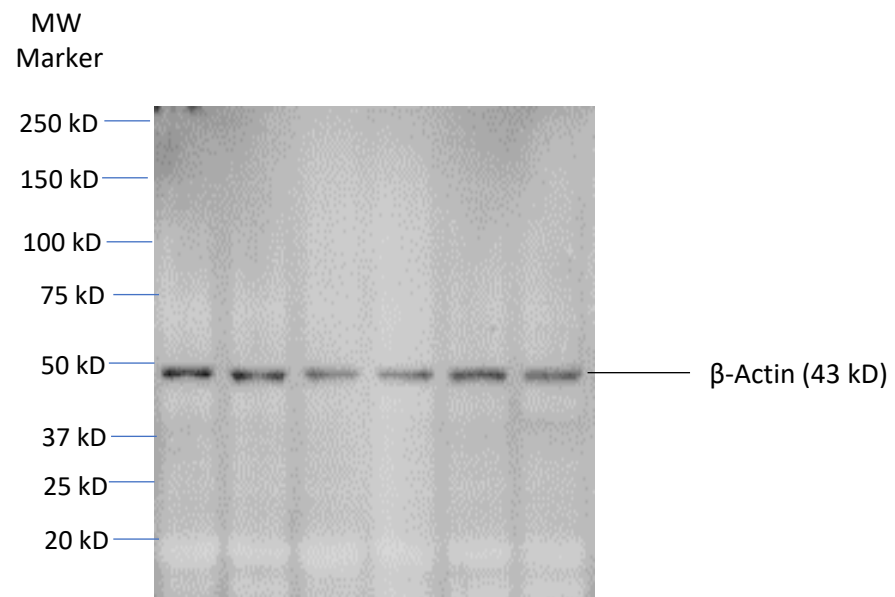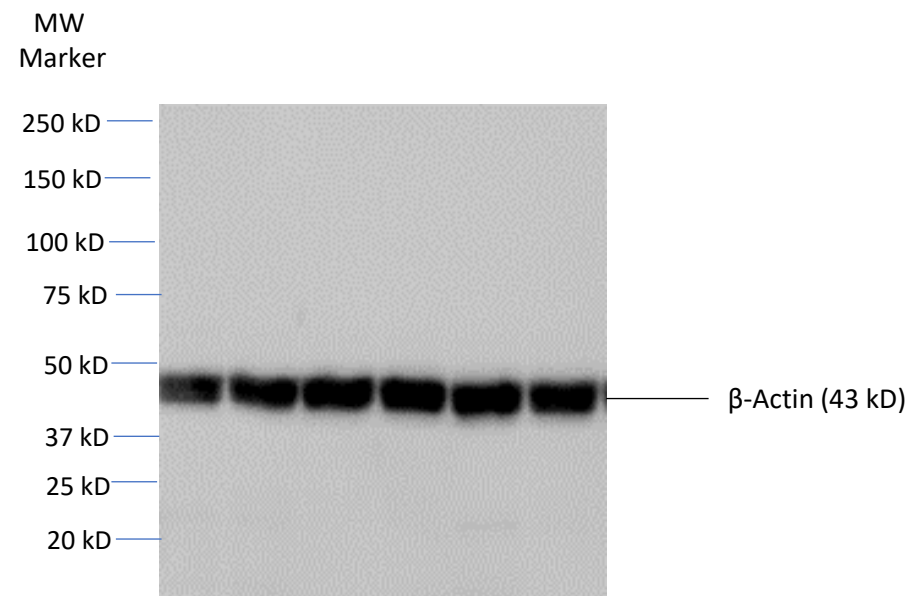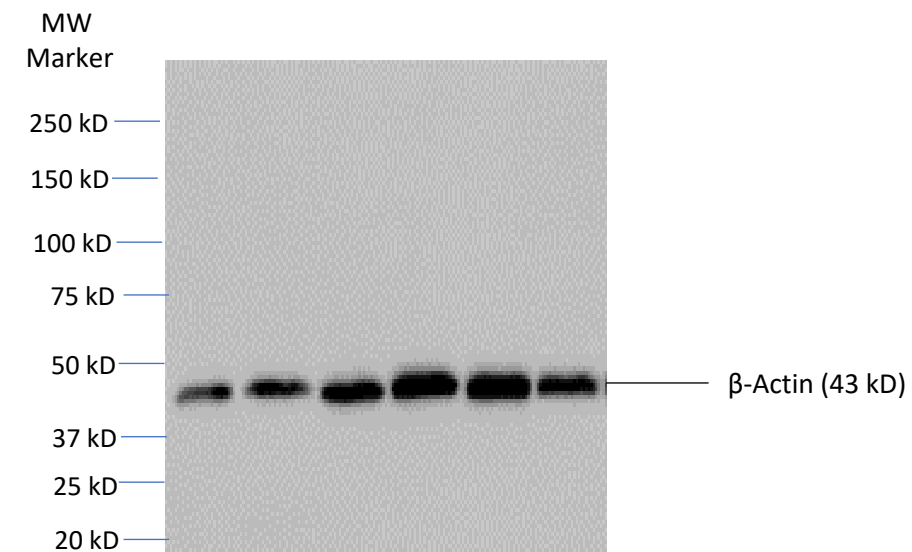

**Figure S3J**  
**GCLC**

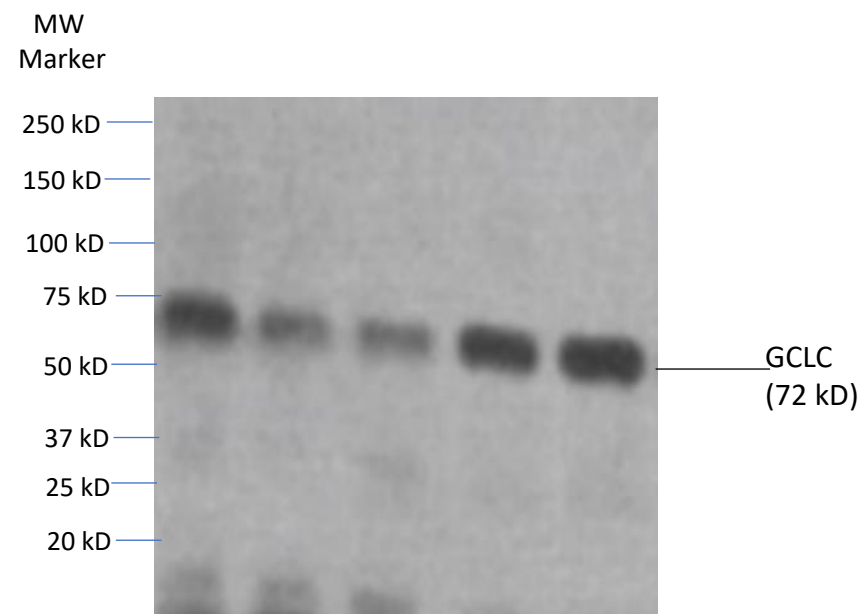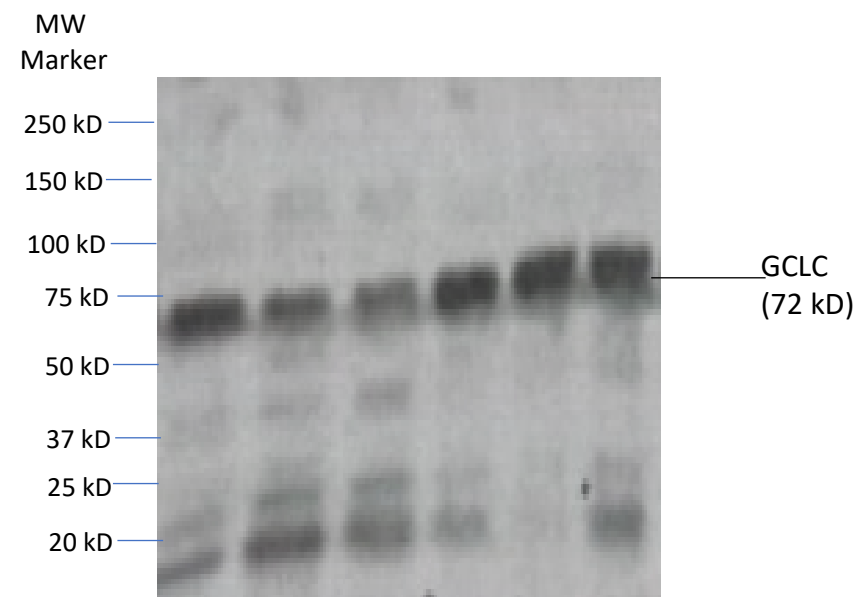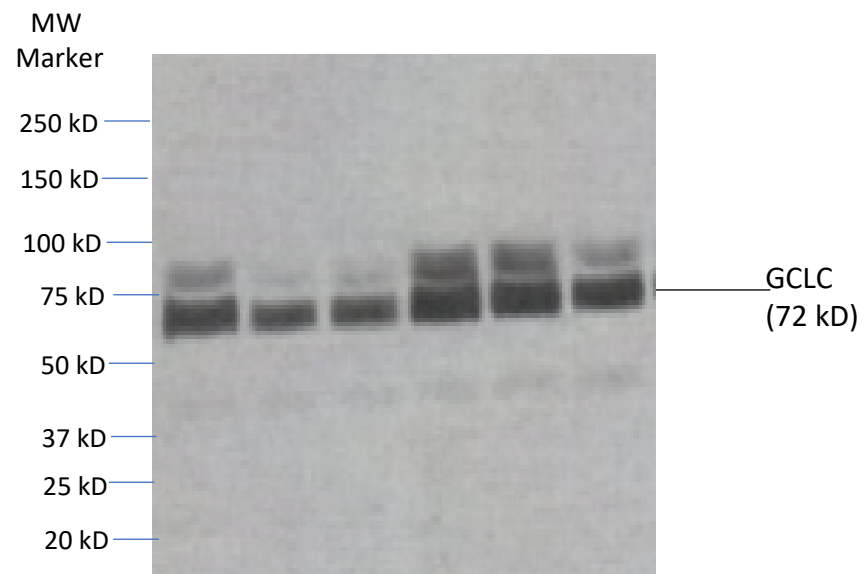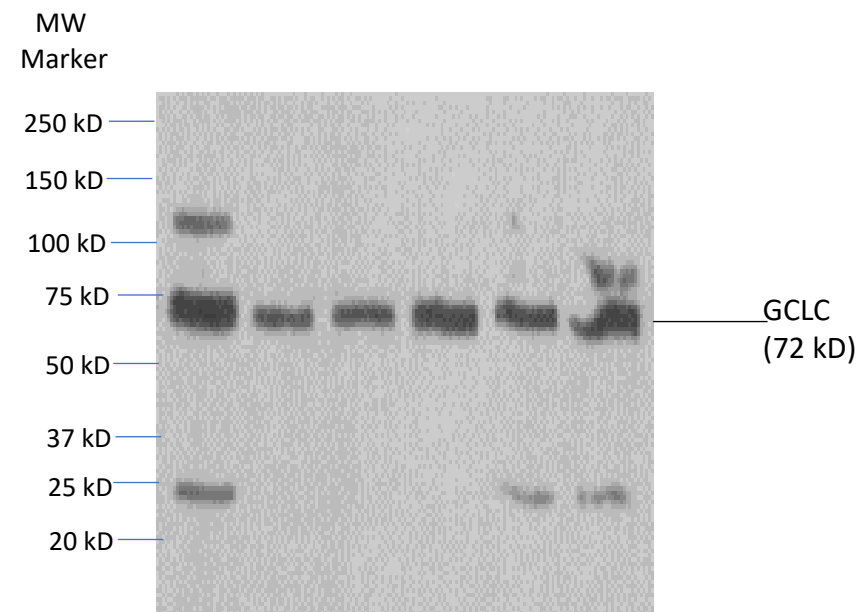



**Figure S3J**  
 **$\beta$ -Actin for GCLC**

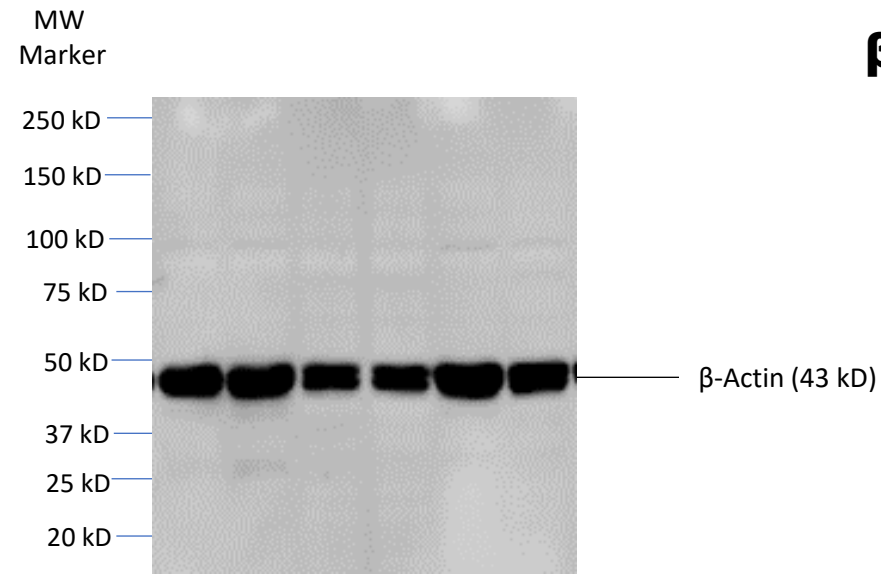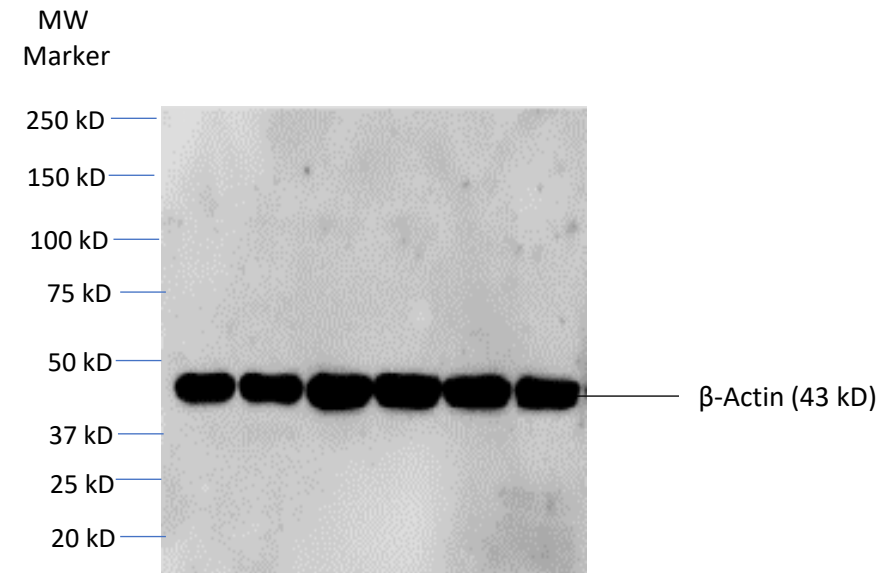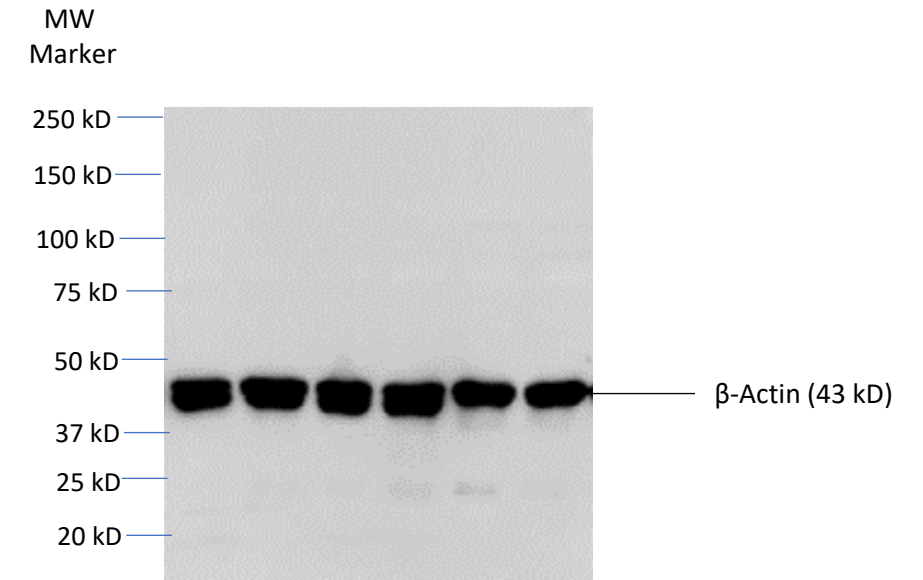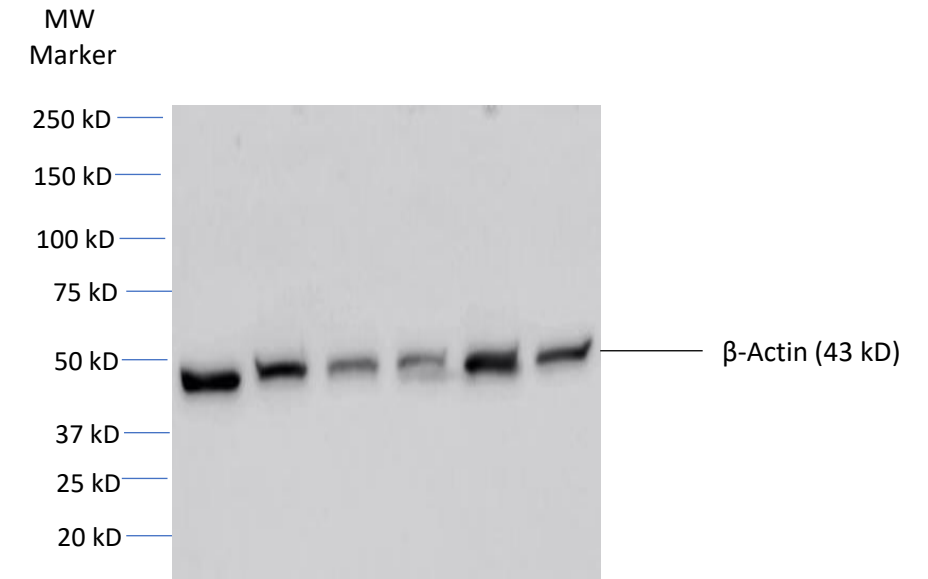

**Figure S3K**  
**Nqo1**

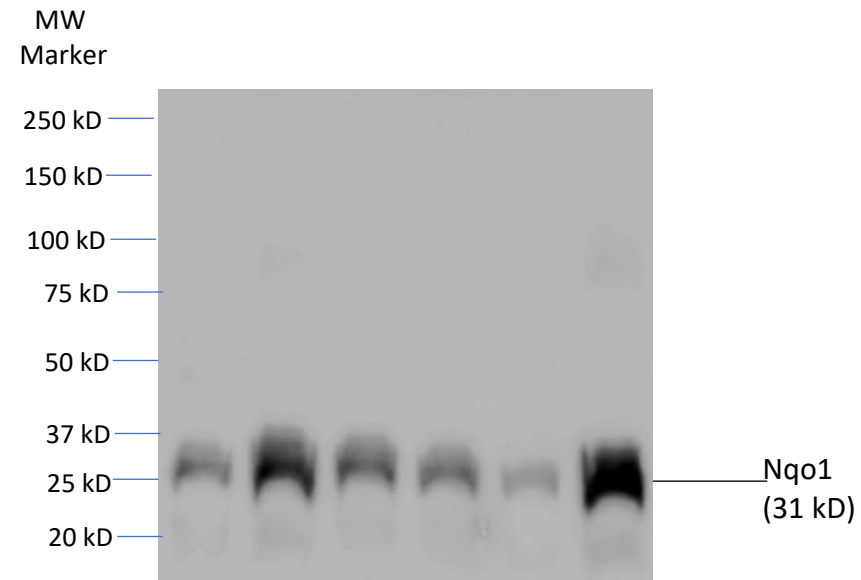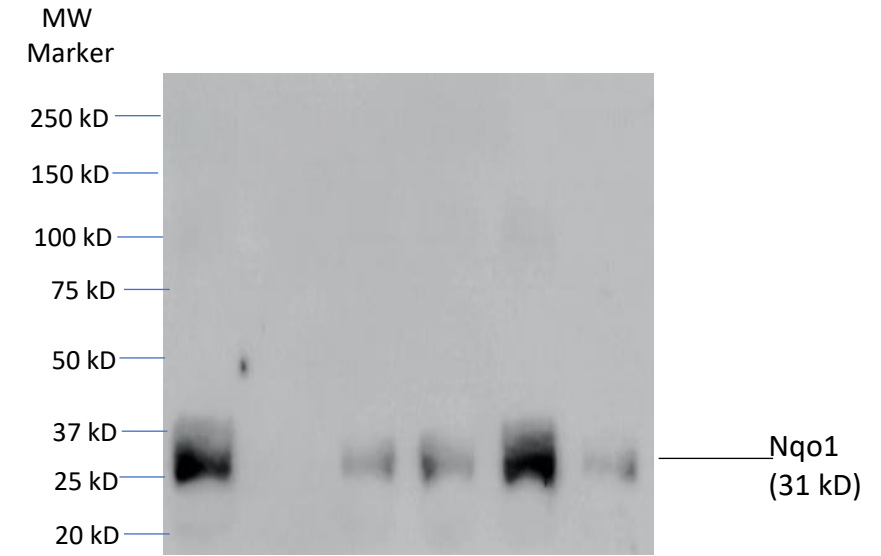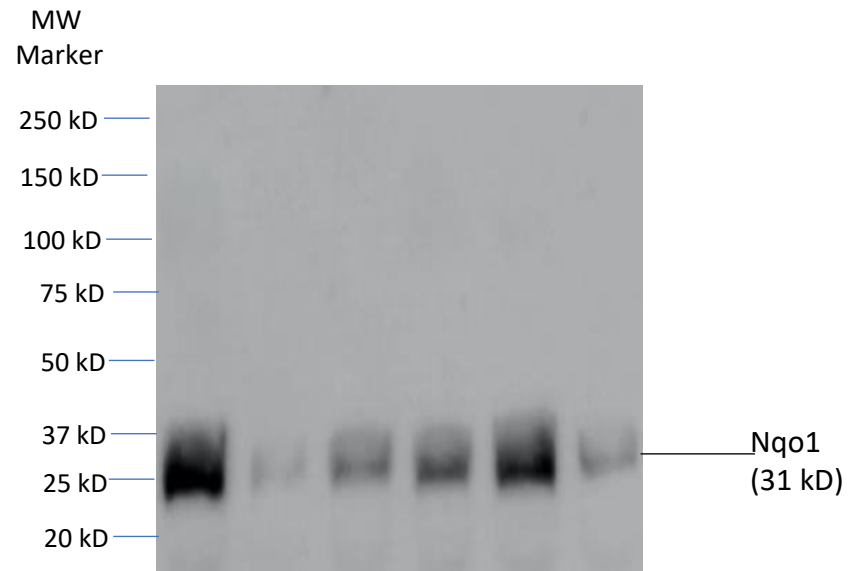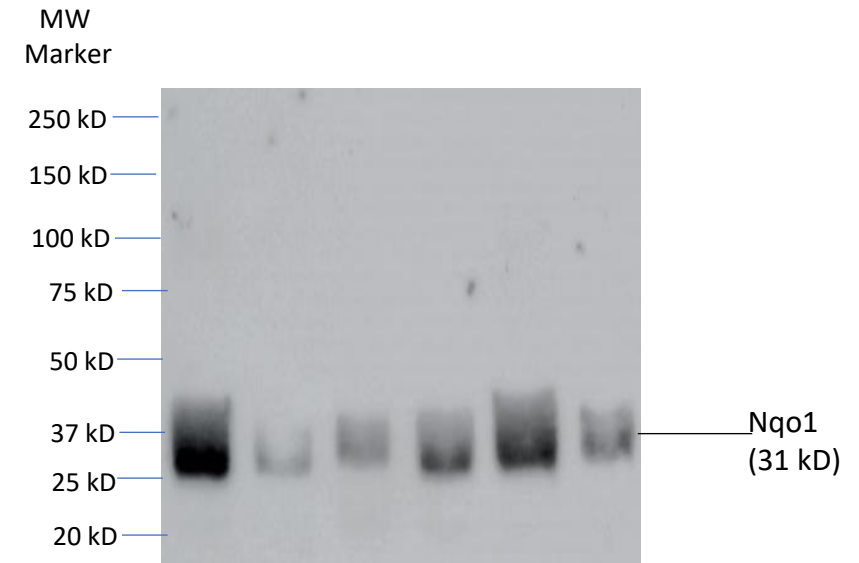

**Figure S3K**  
 **$\beta$ -Actin for Nqo1**

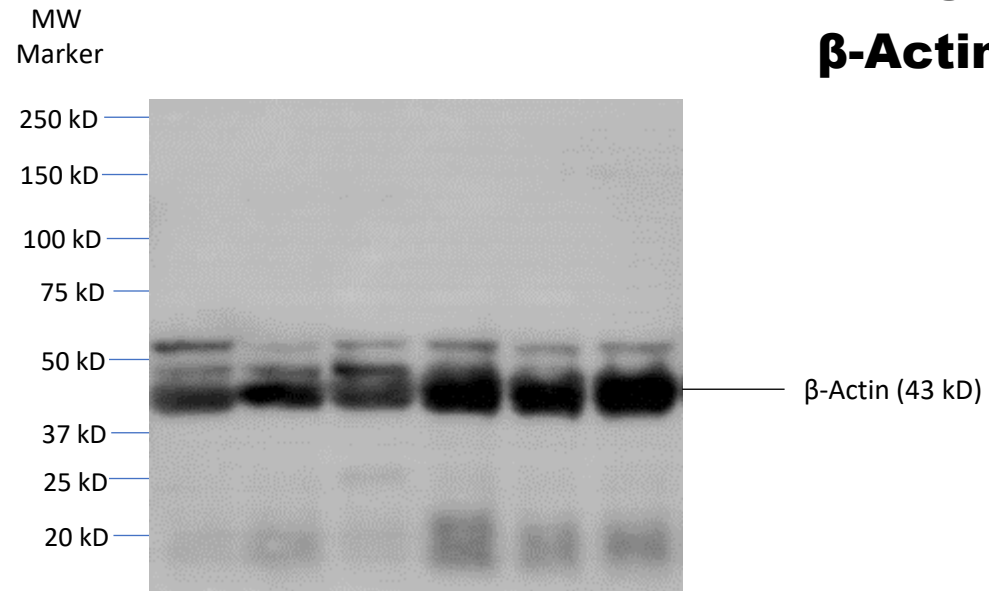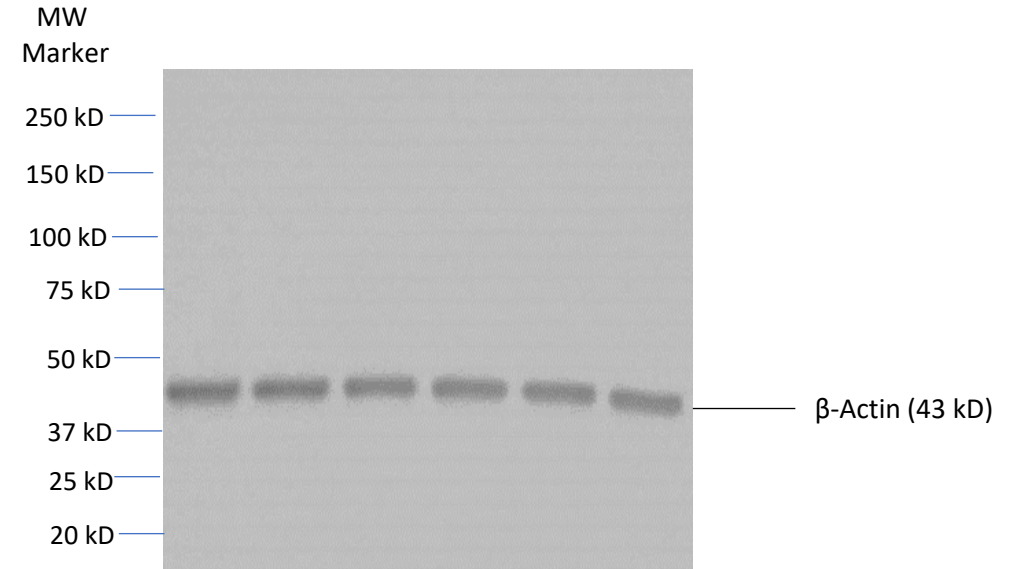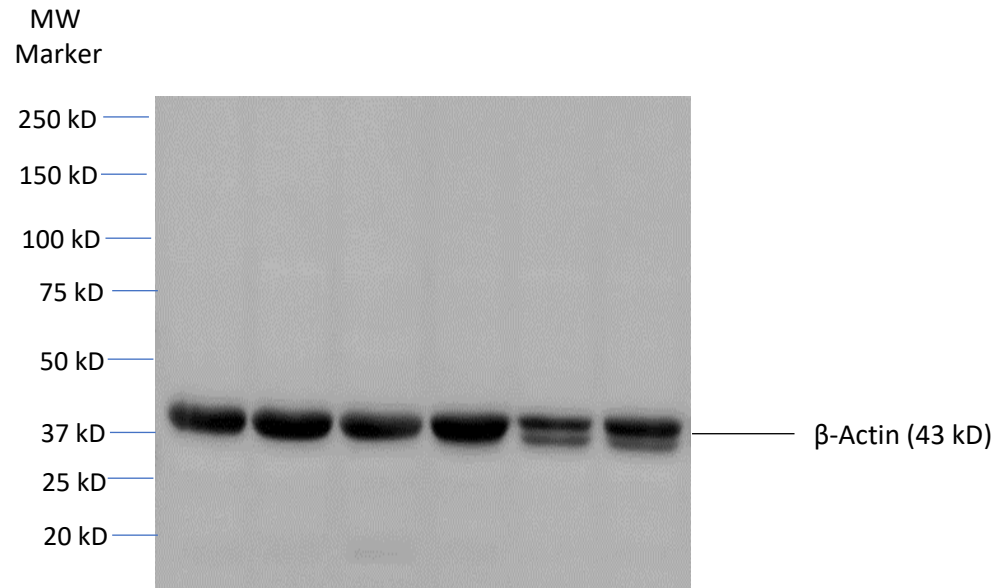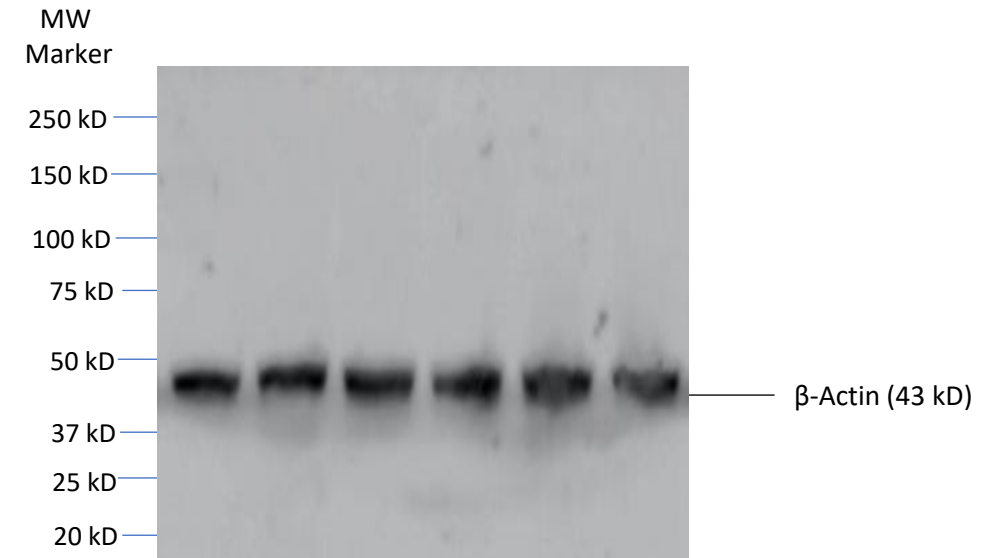

**Figure S4C**  
**nNOS  $\alpha$**

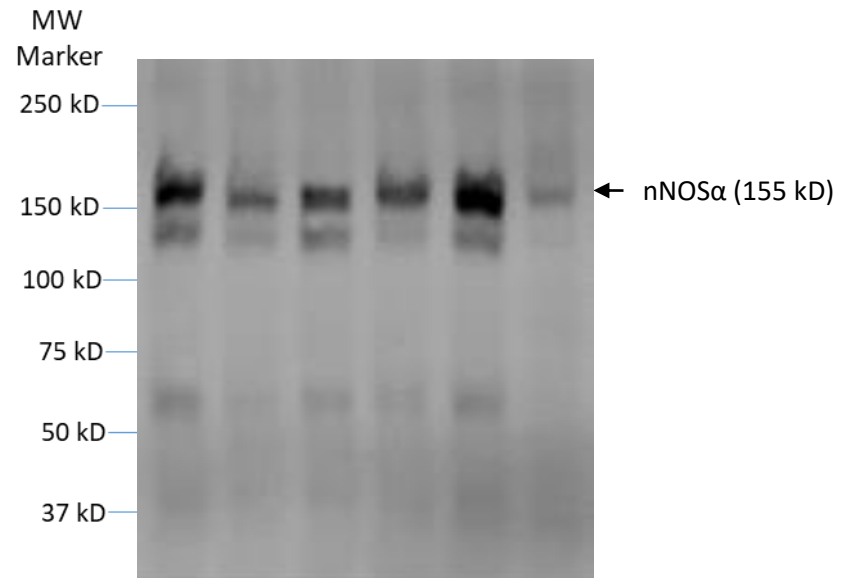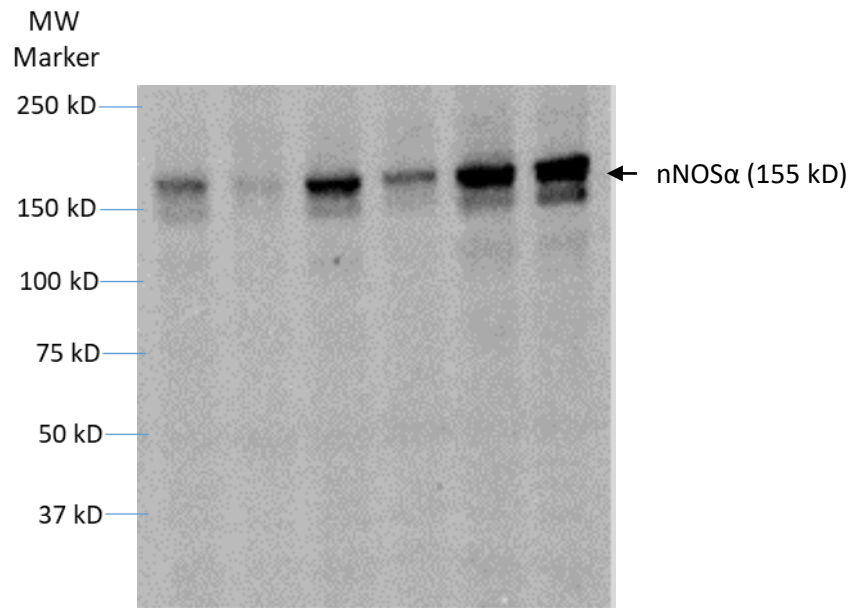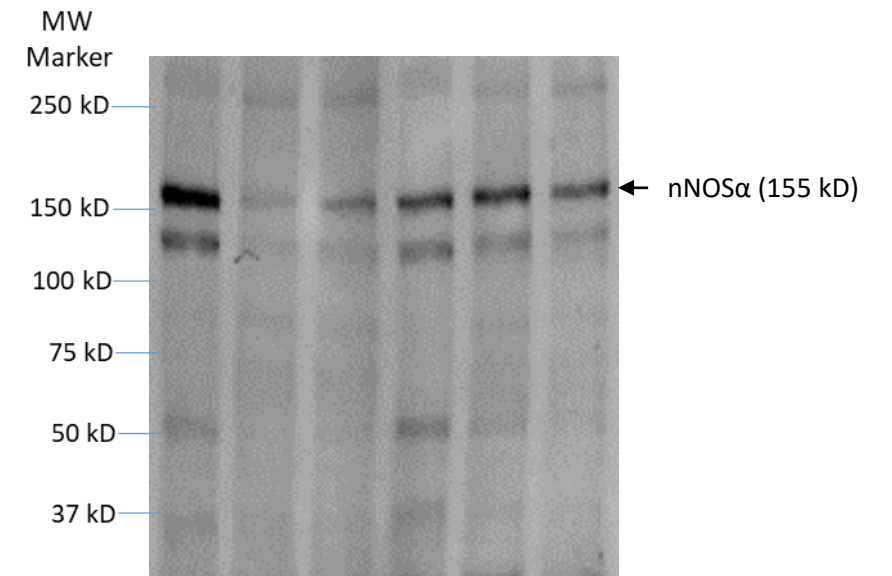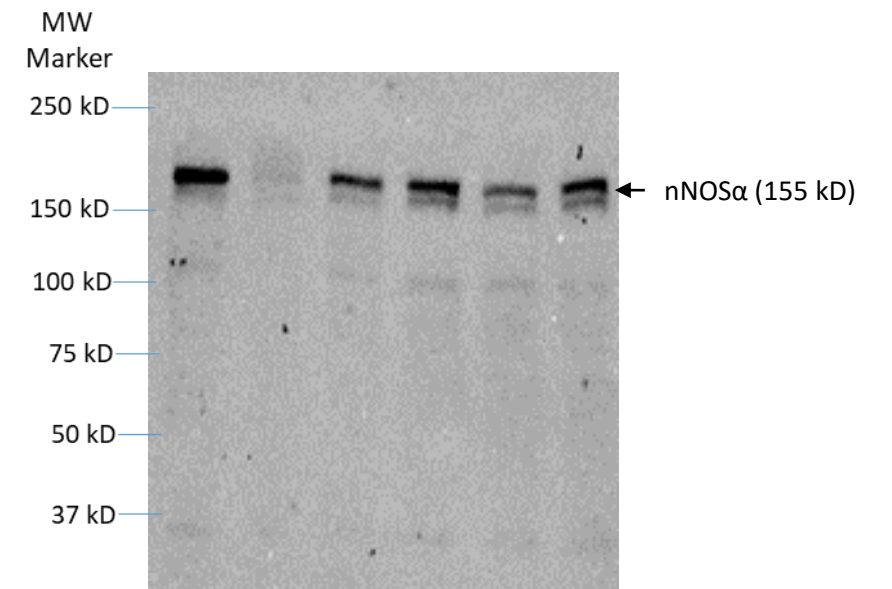

**Figure S4C**  
 **$\beta$ -Actin for nNOS  $\alpha$**

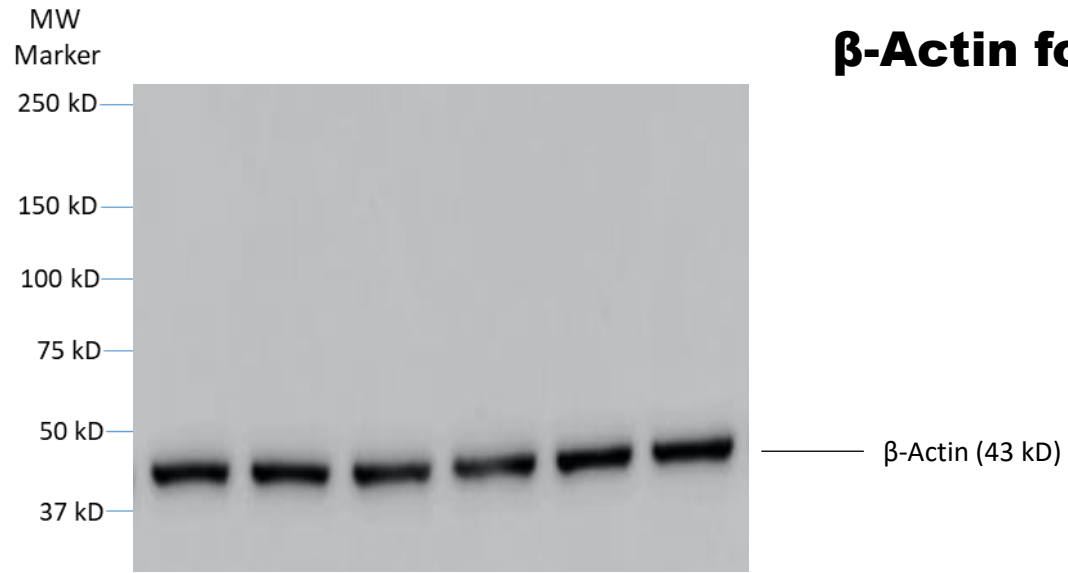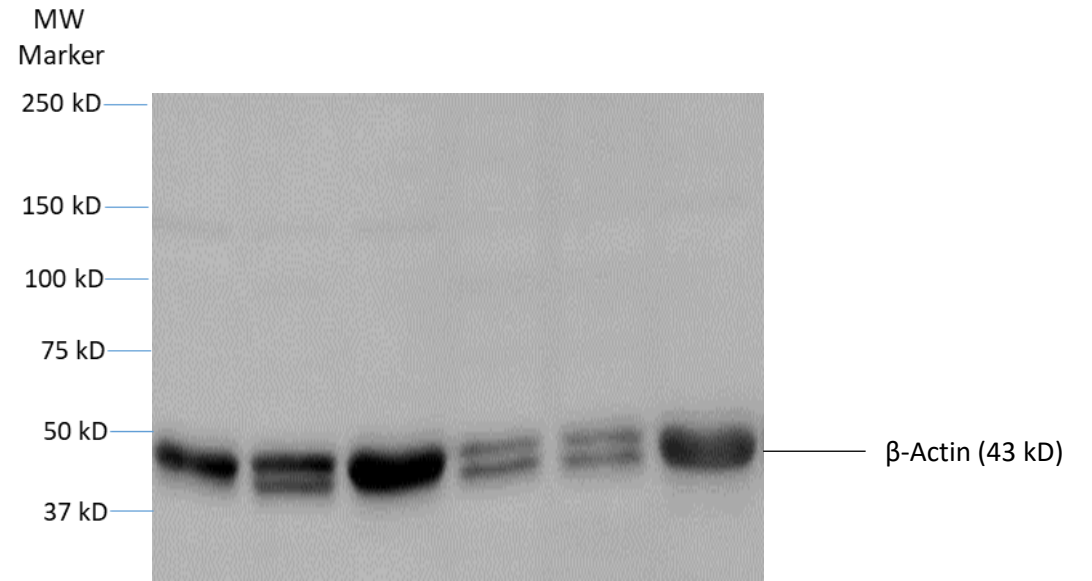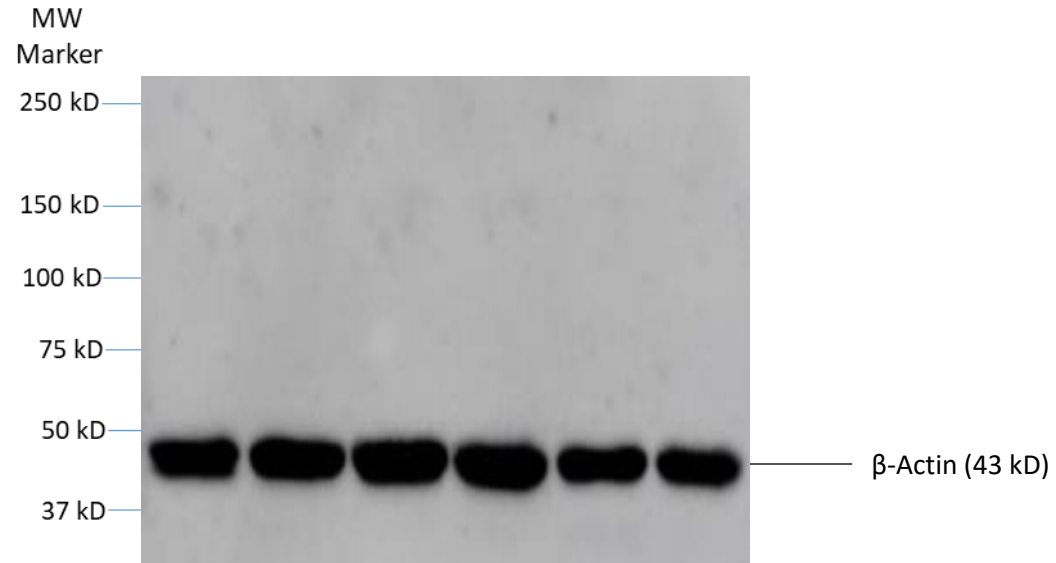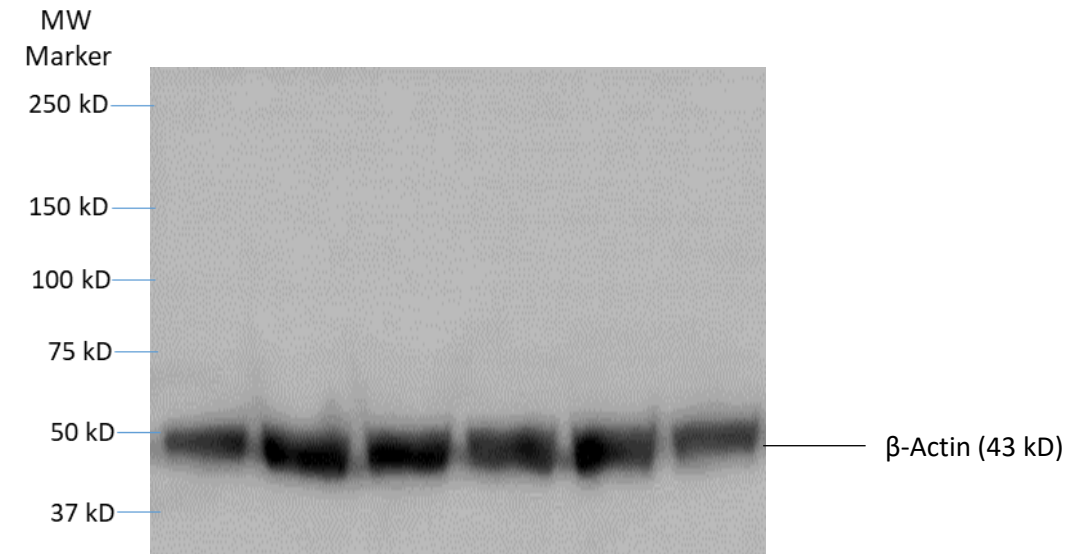

**Figure S4D**  
**GCH-1**

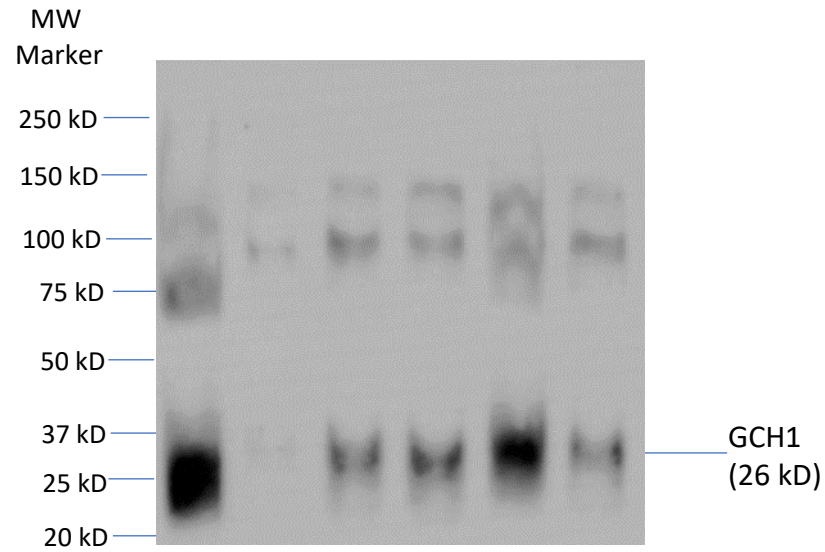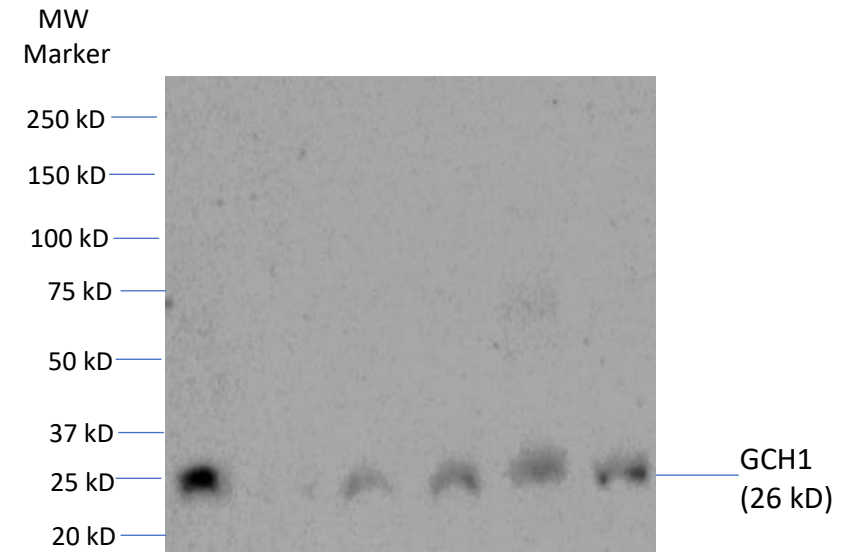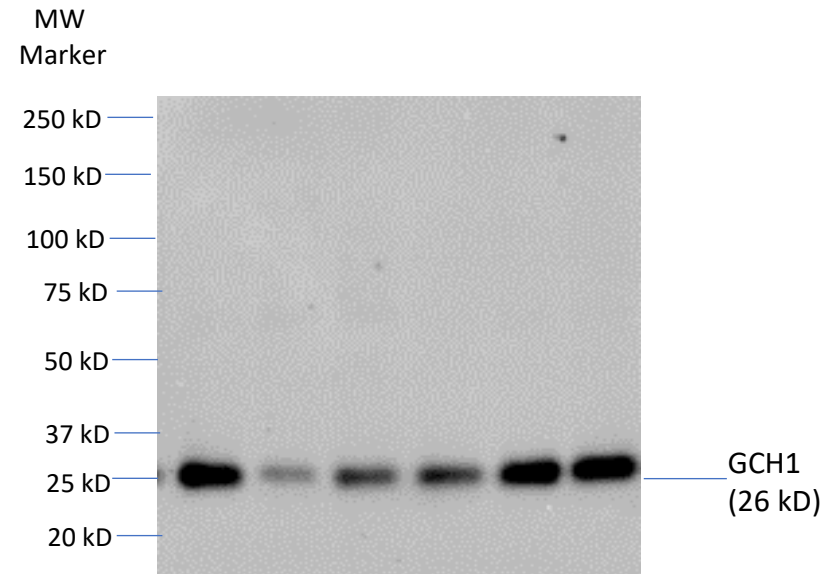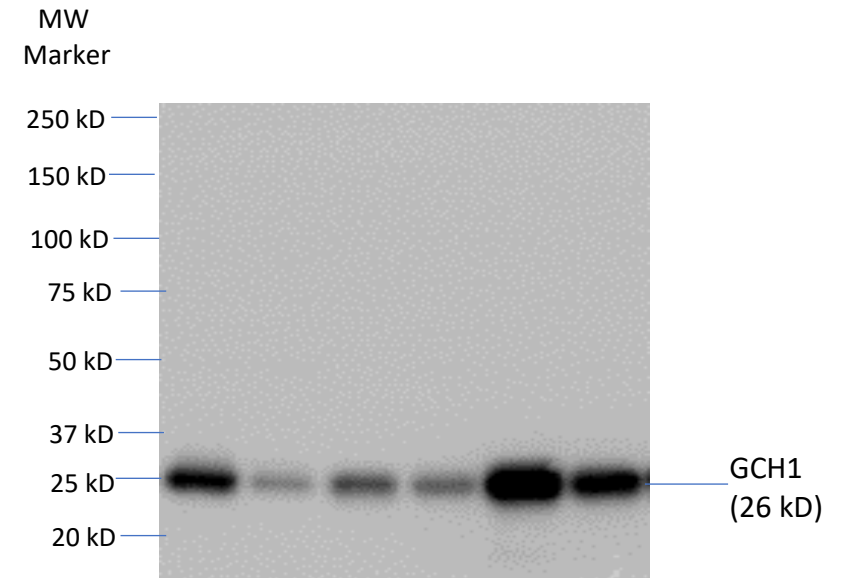

**Figure S4D**  
 **$\beta$ -Actin for GCH-1**

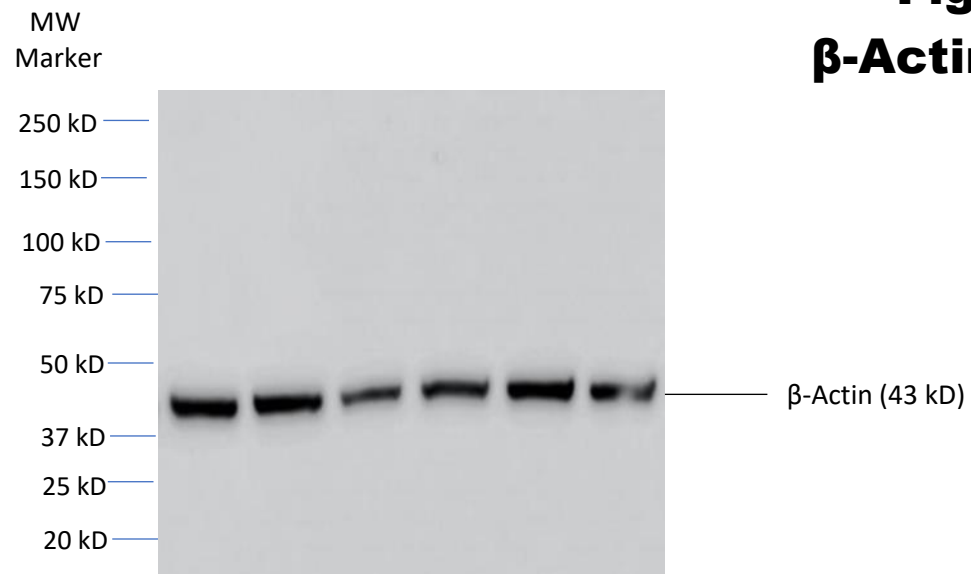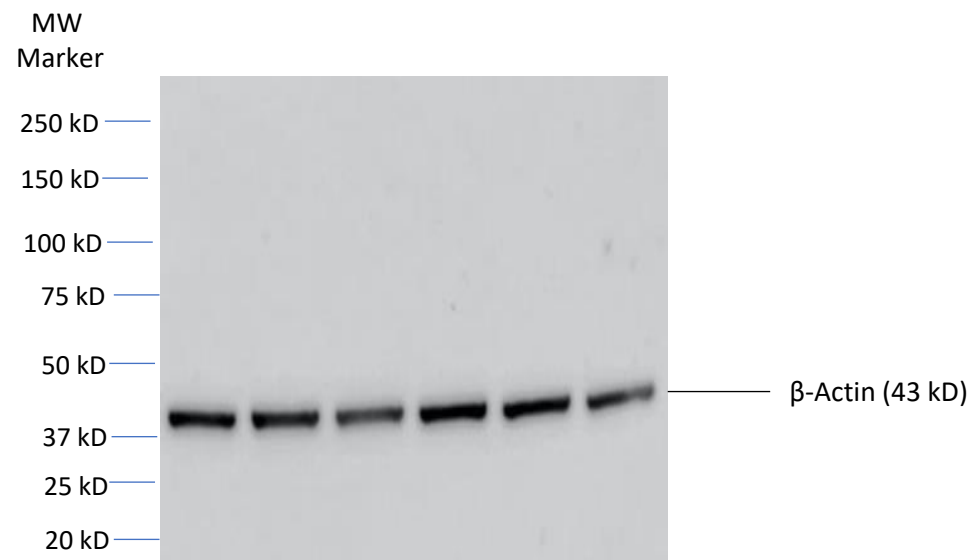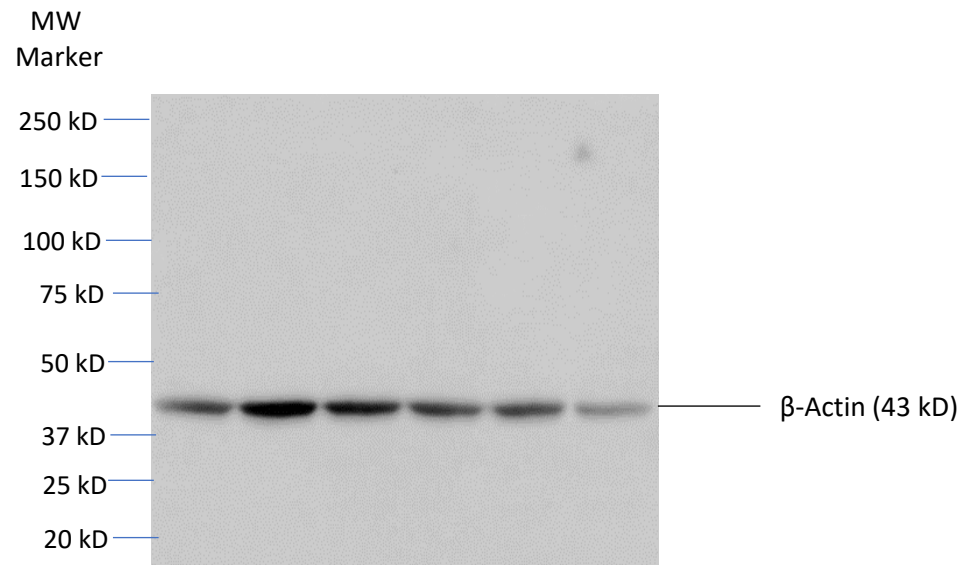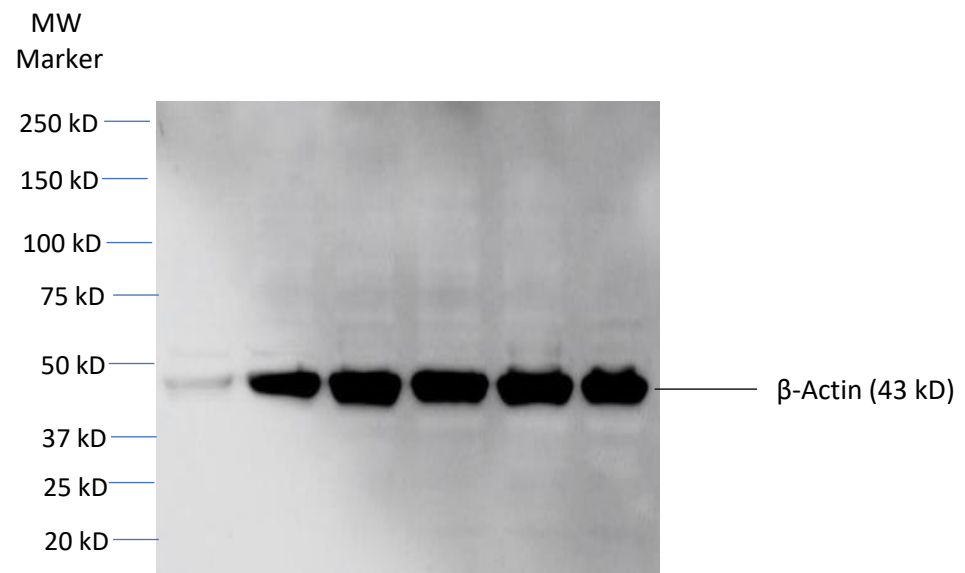



**Figure S5A**  
**Ikk  $\beta$**

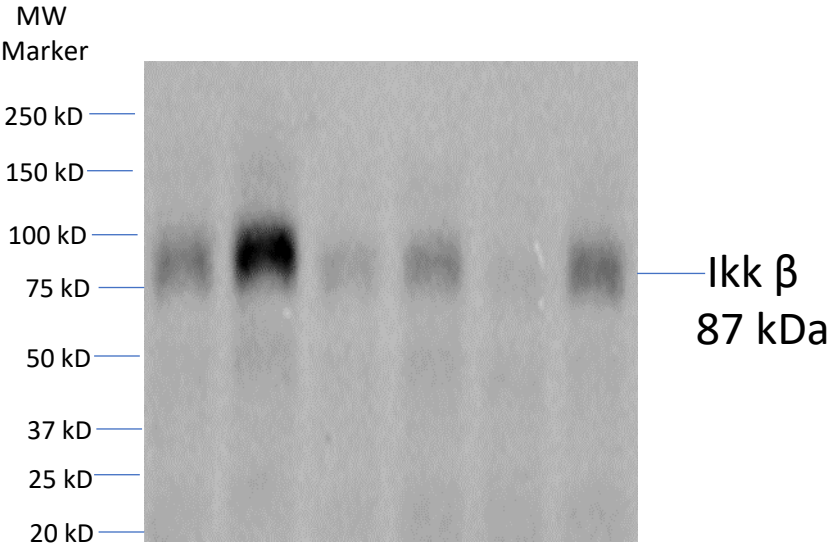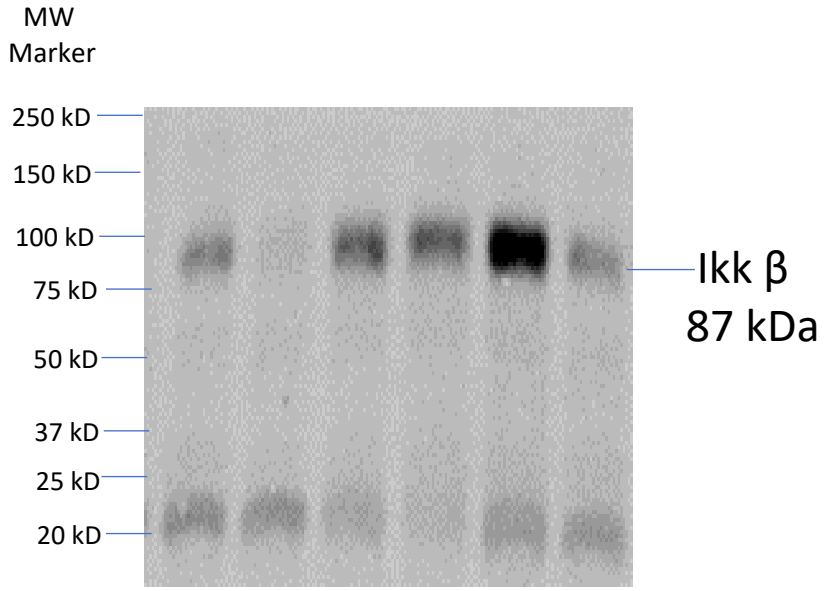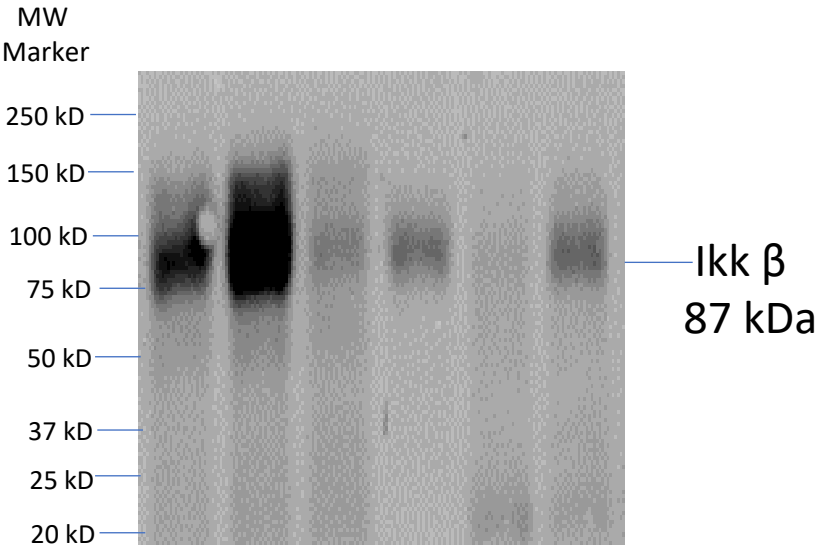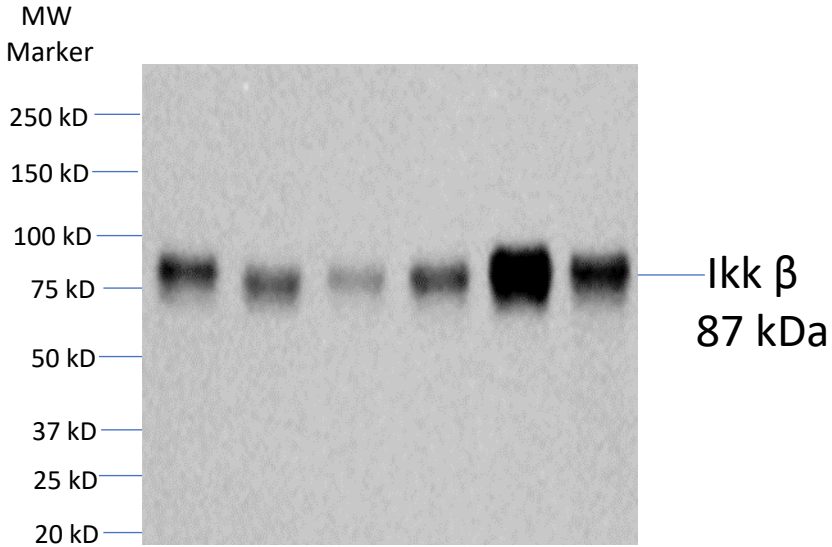



**Figure S5A**  
 **$\beta$ -Actin for Ikk  $\beta$**

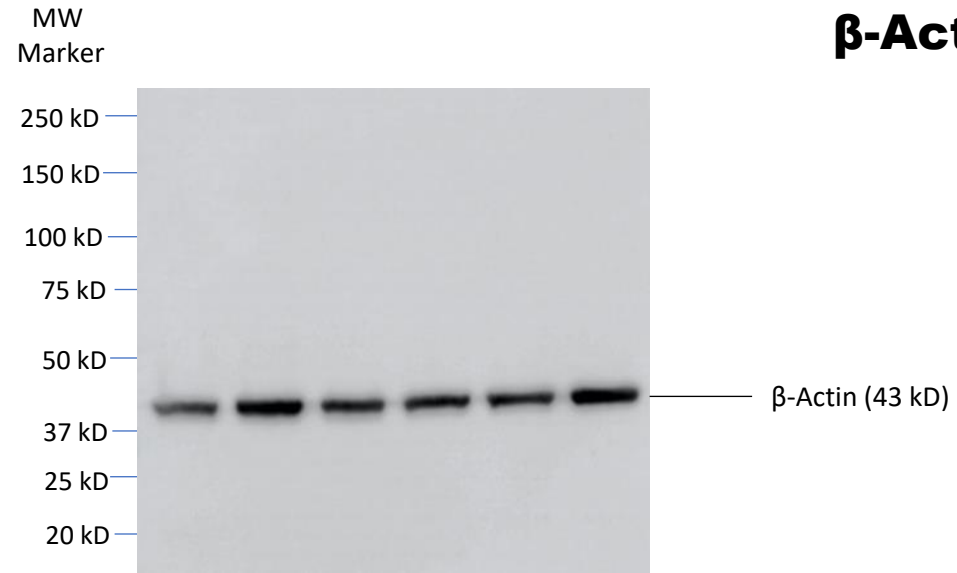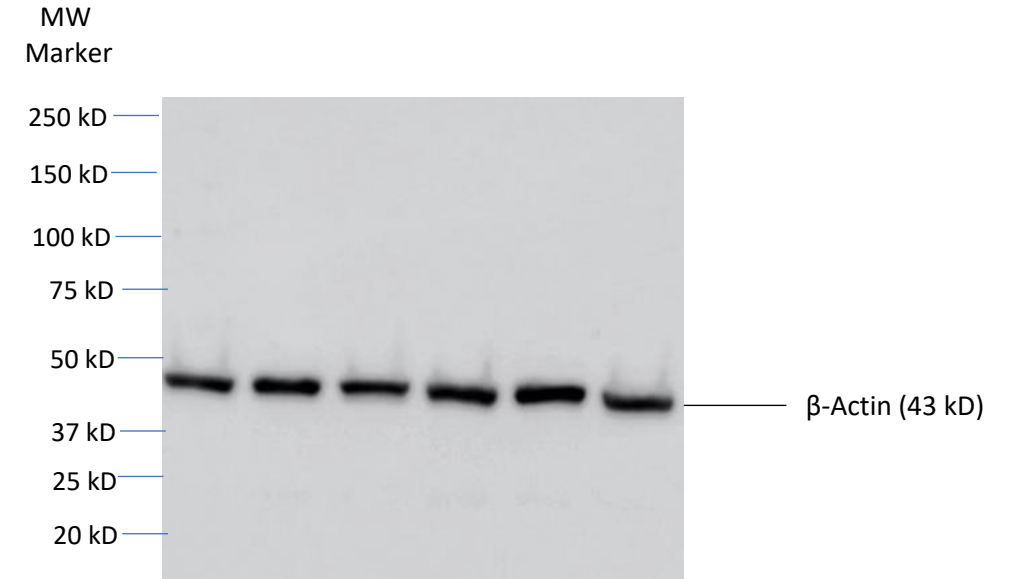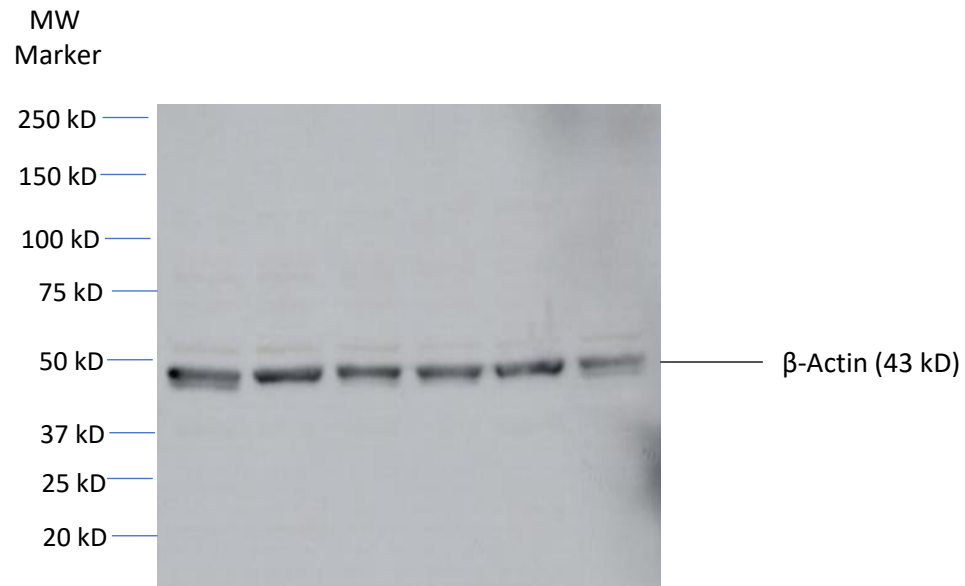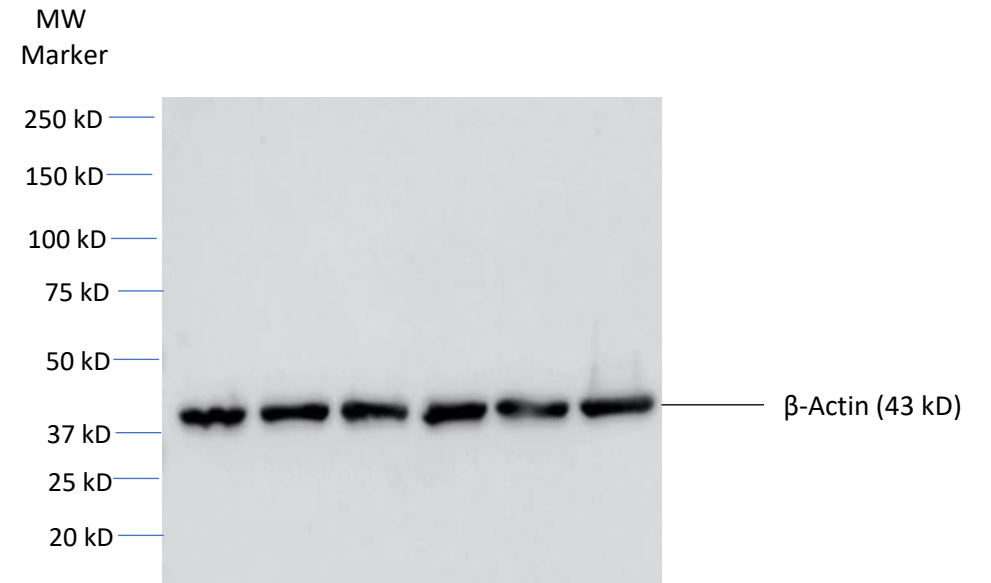

**Figure S5B**

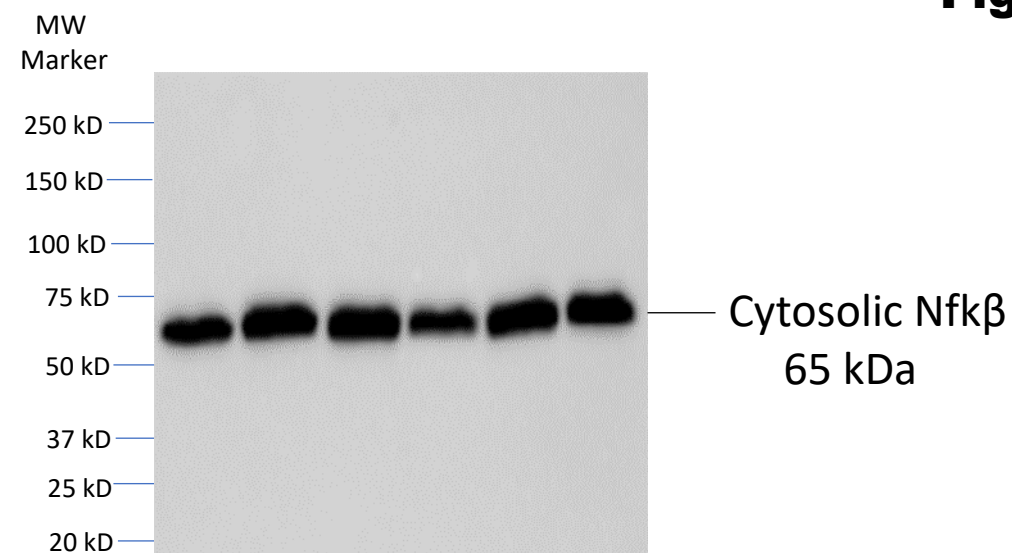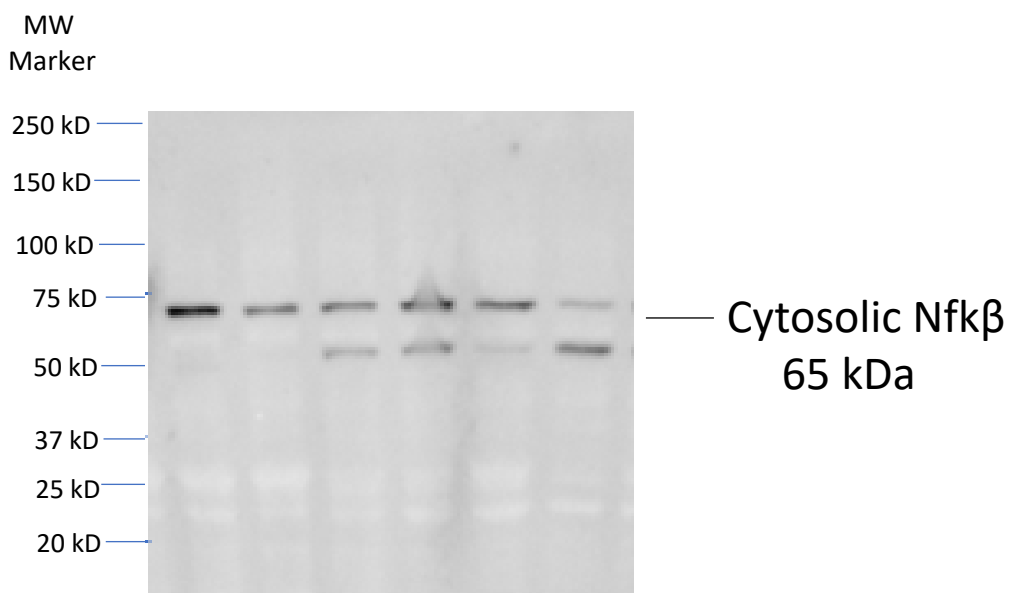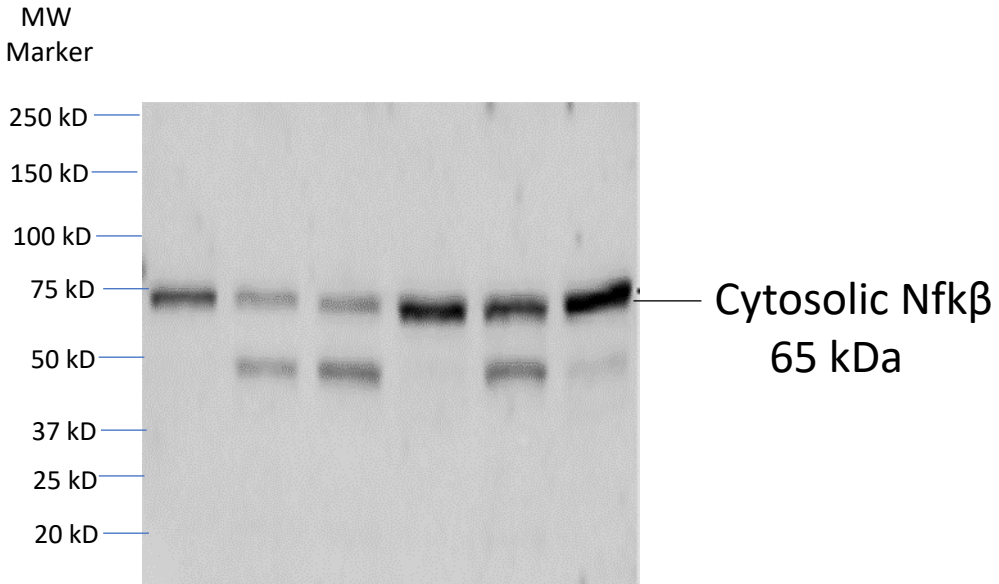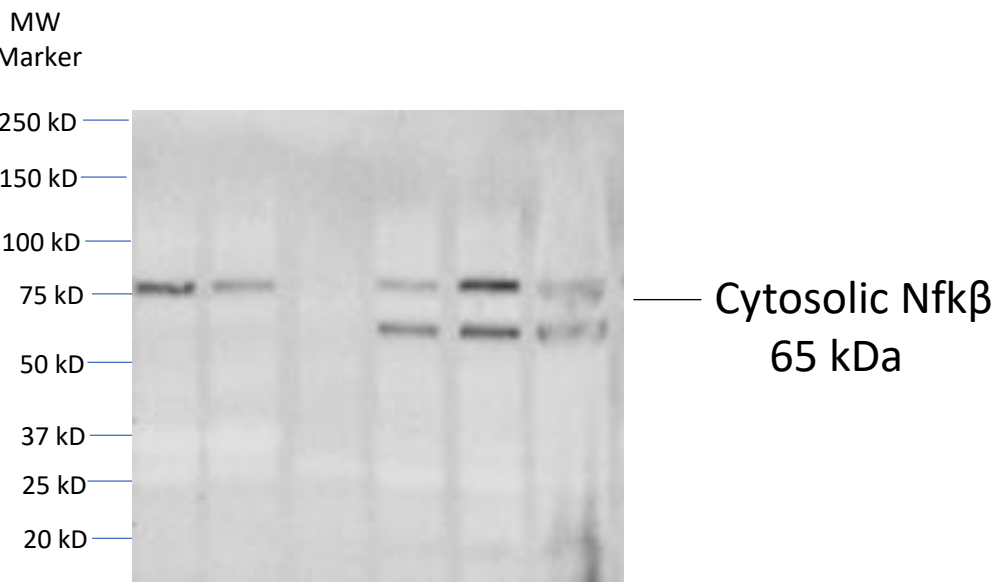

**Figure S5B**  
 **$\beta$ -Actin for Cytosolic Nf $\kappa$ B**

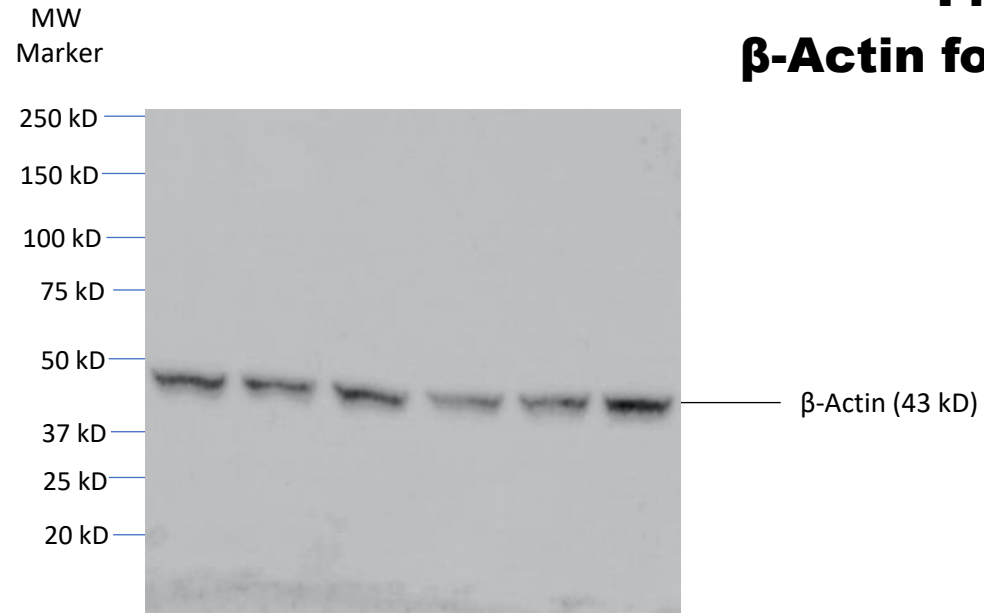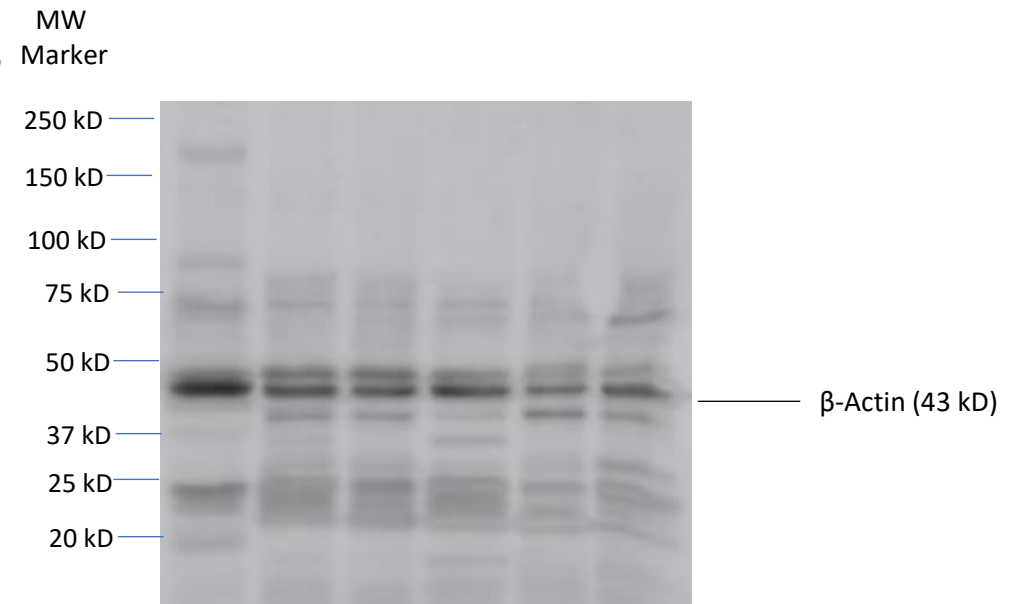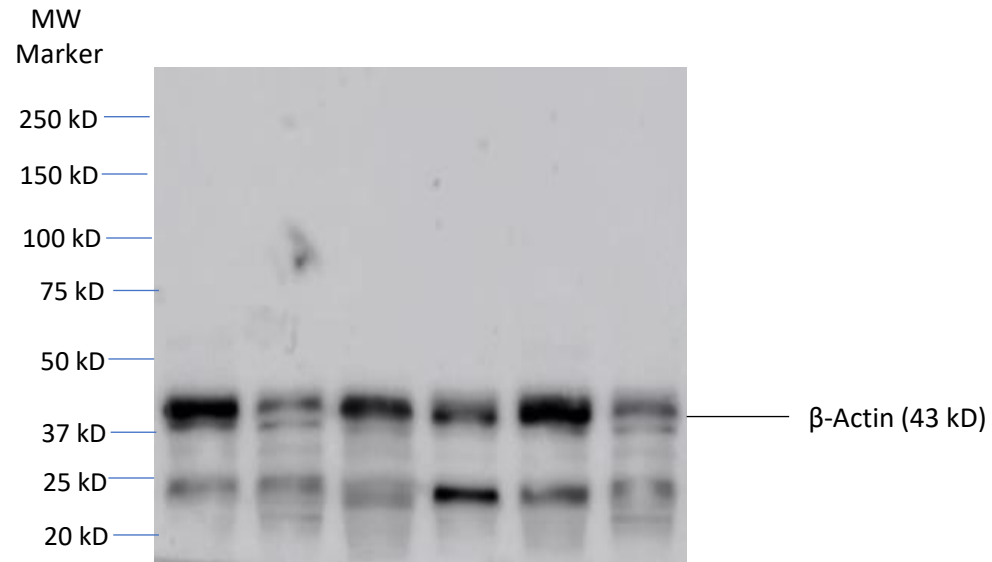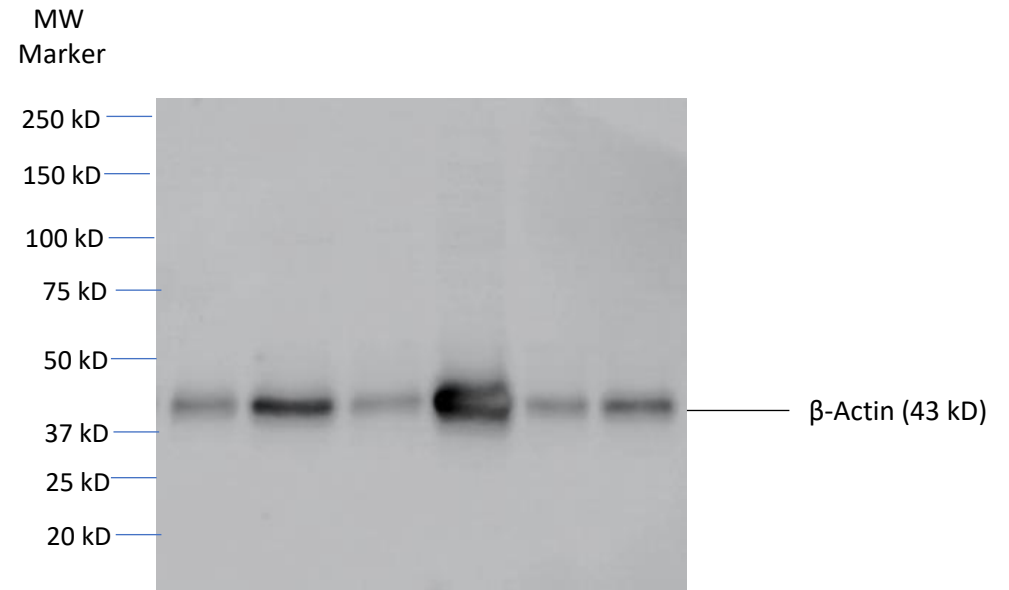

**Figure S5B**

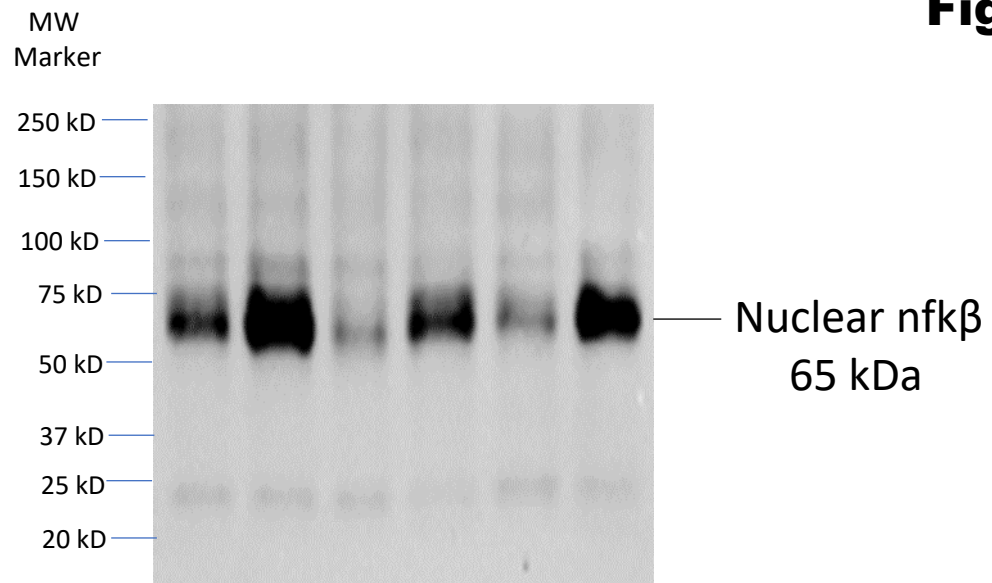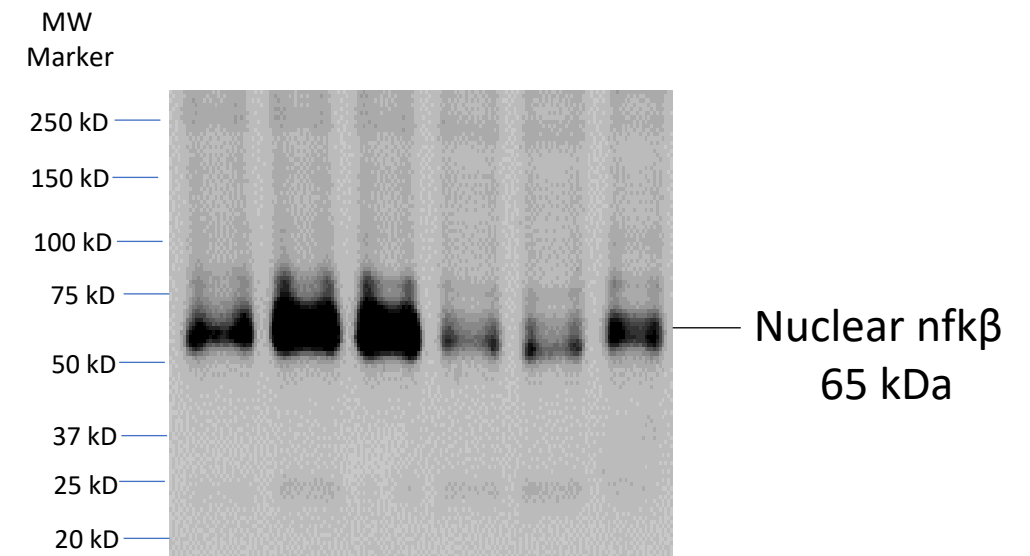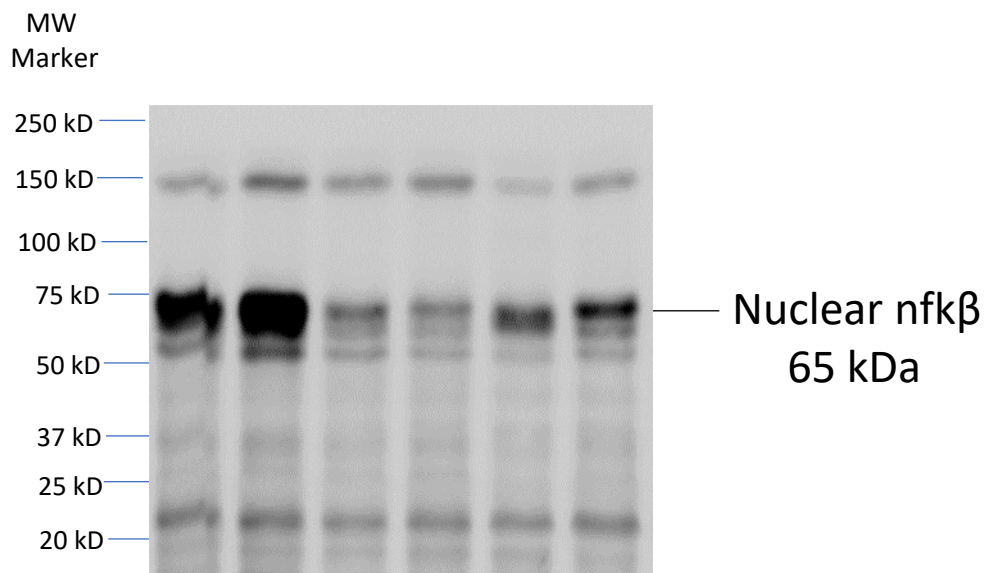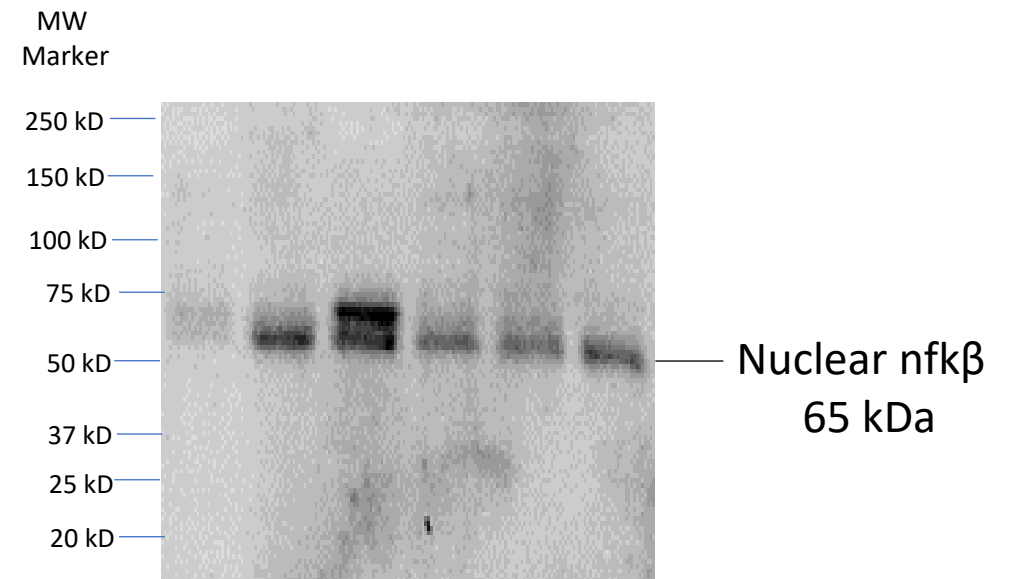

**Figure S5C**  
**Lamin B1 for Nuclear Nrf2**

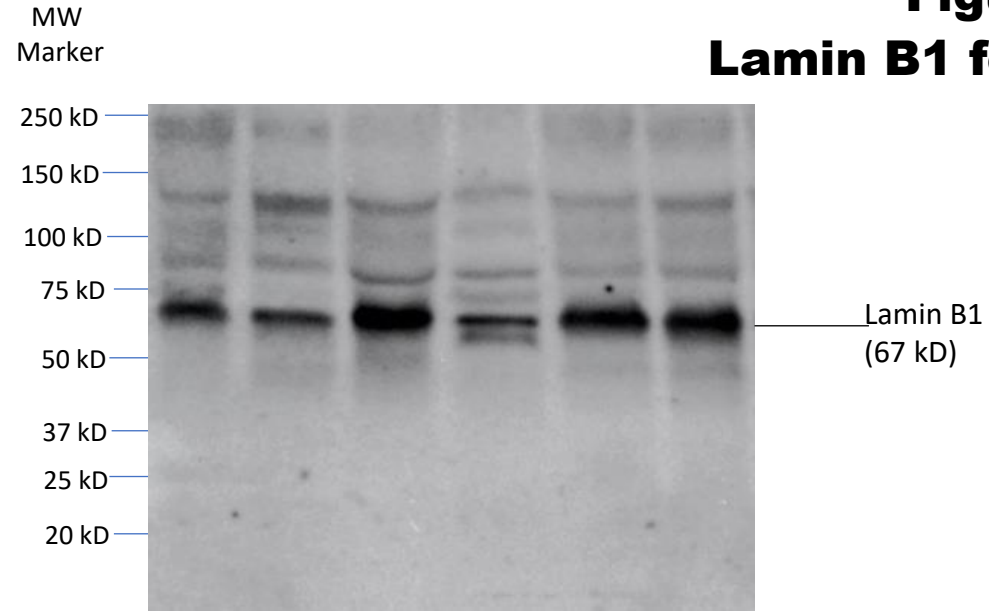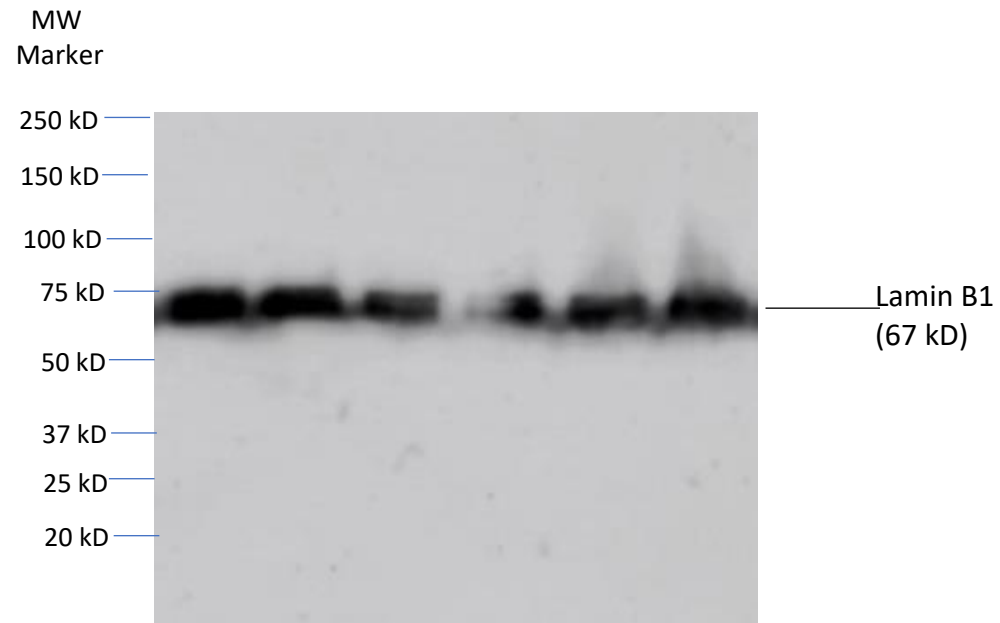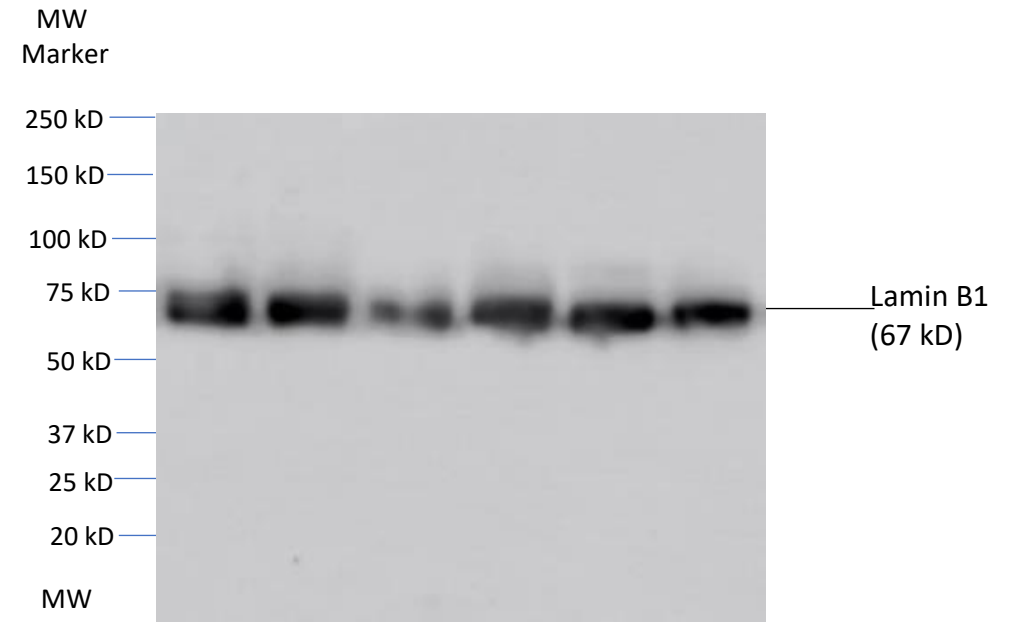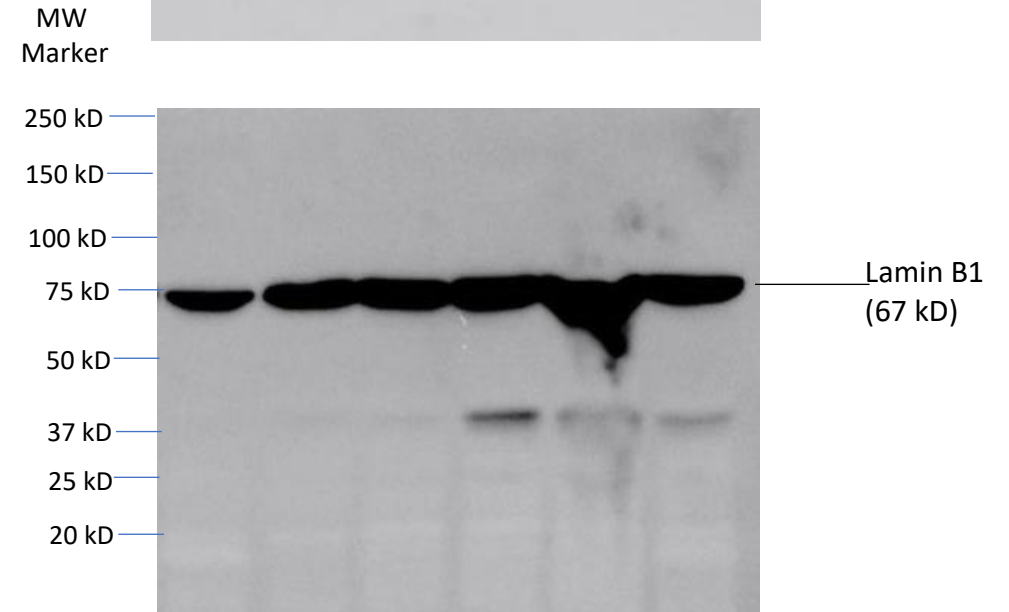

**Figure S5E**

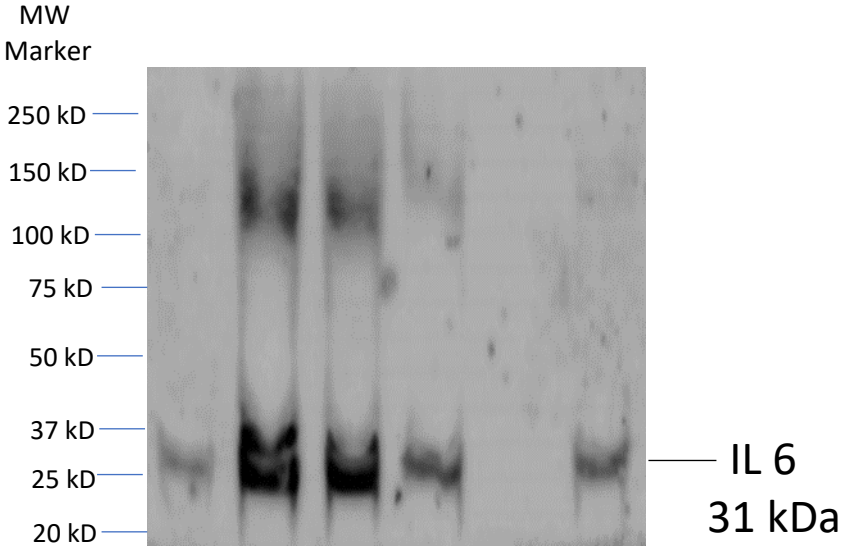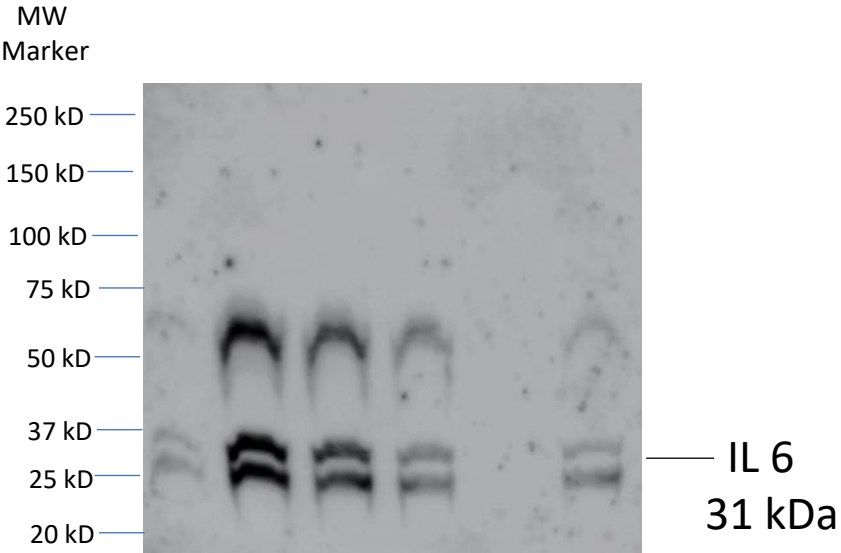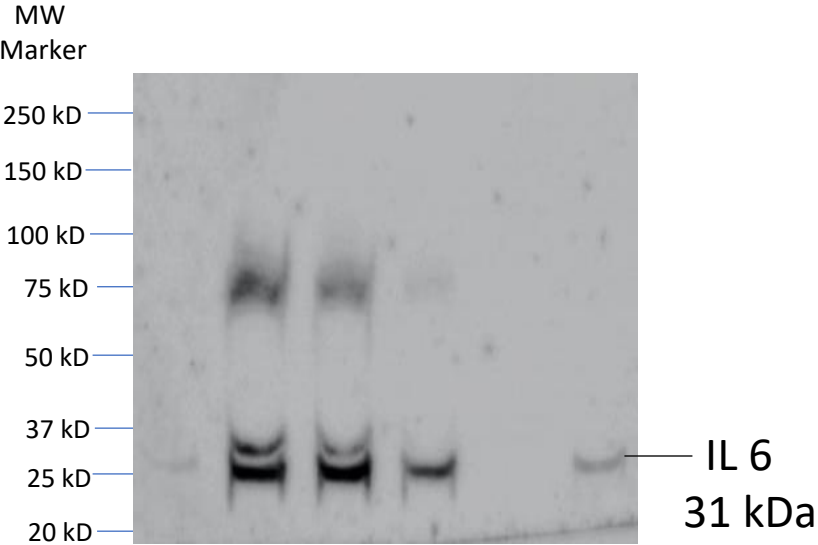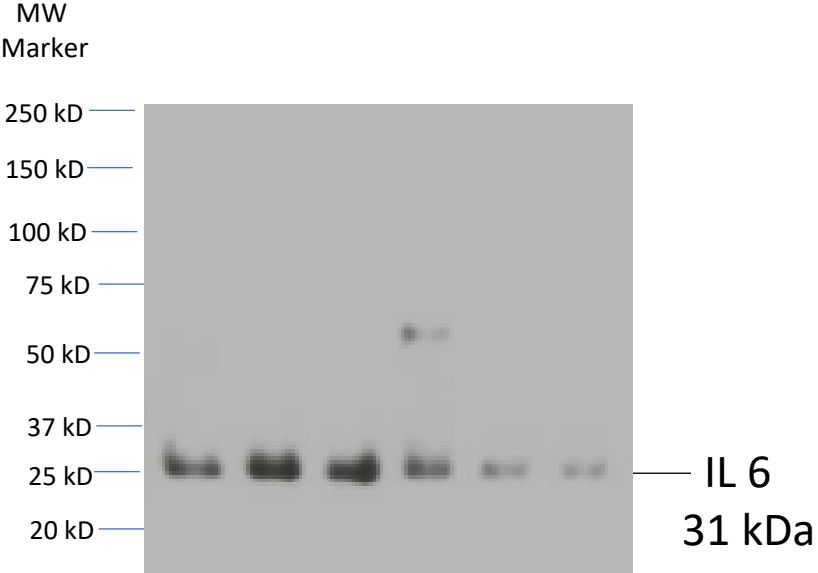

**Figure S5E**  
 **$\beta$ -Actin for IL 6**

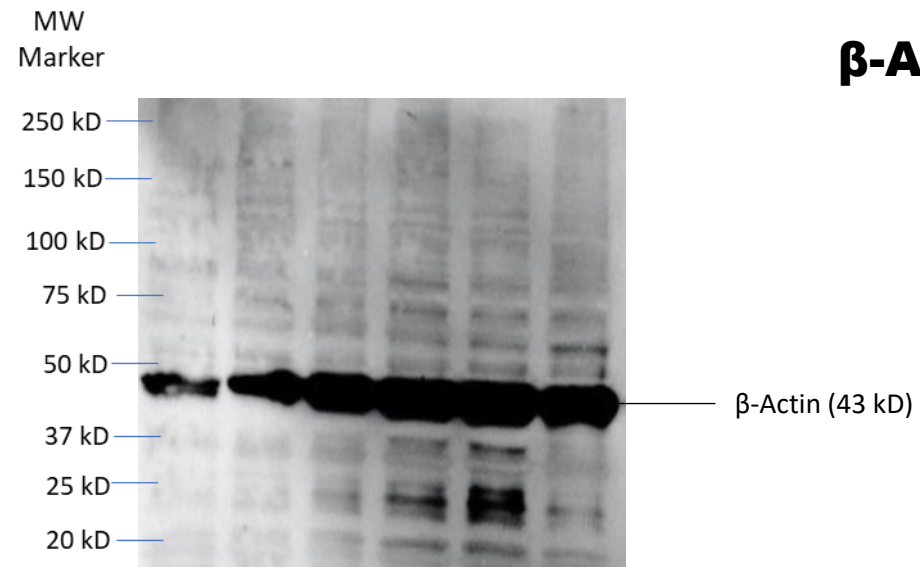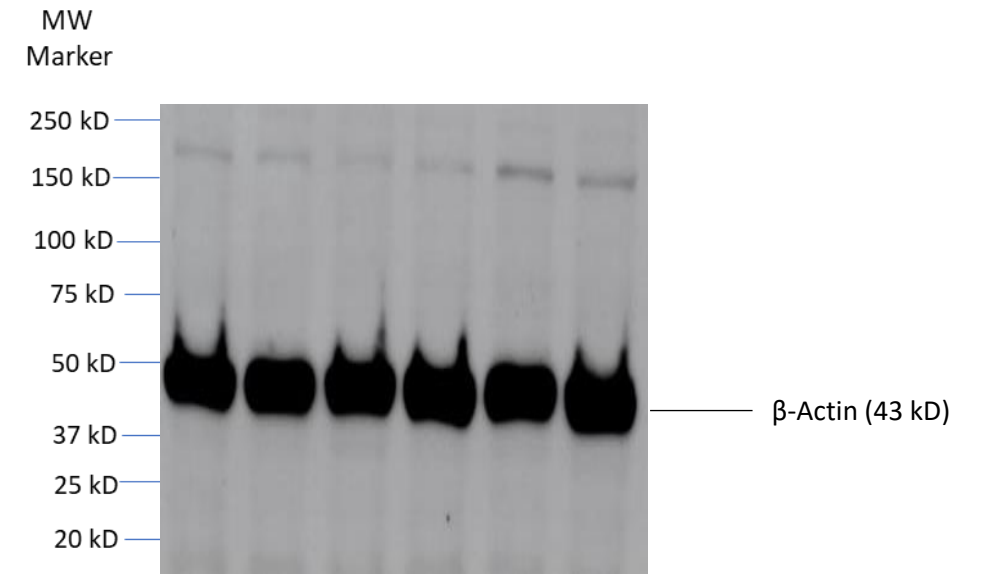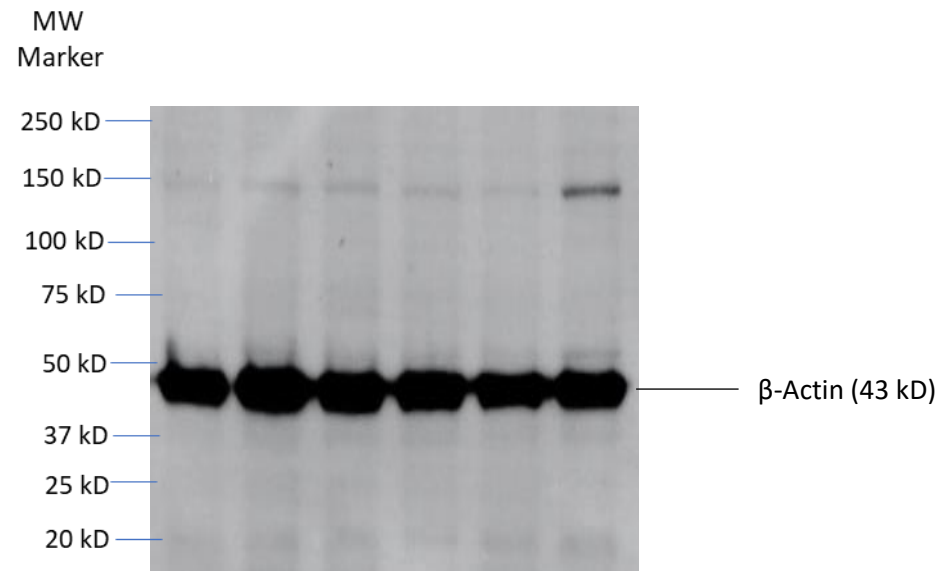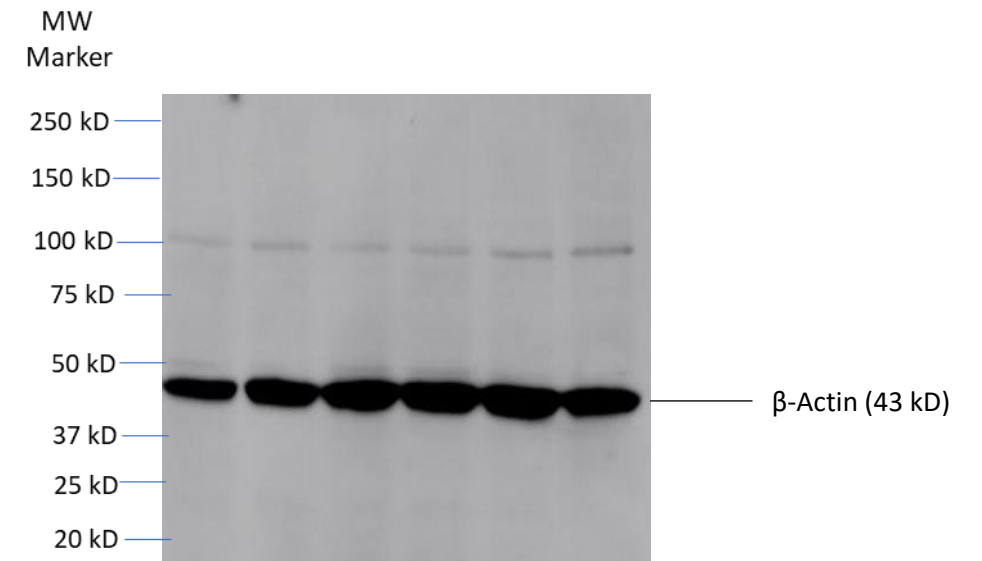

**Figure S5F**

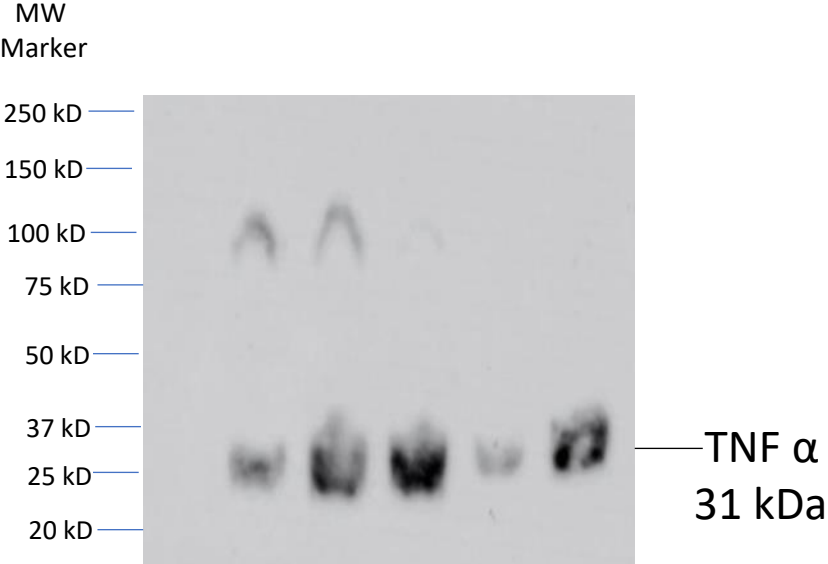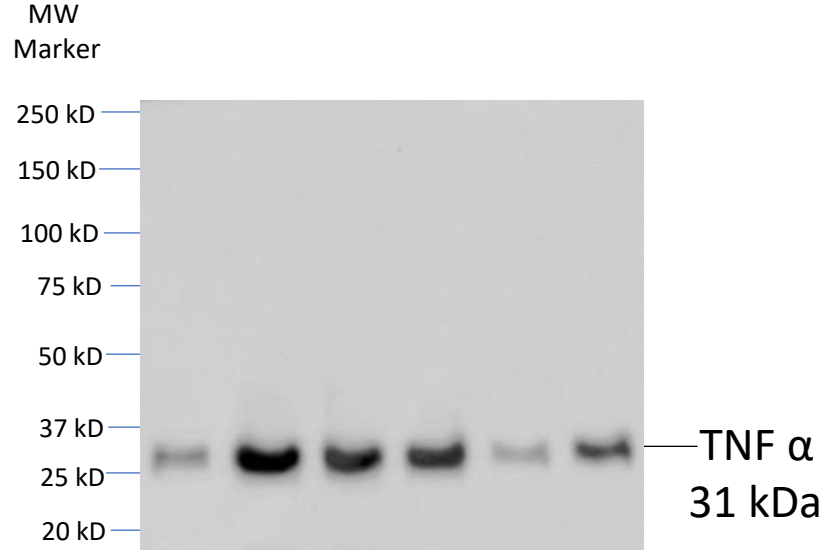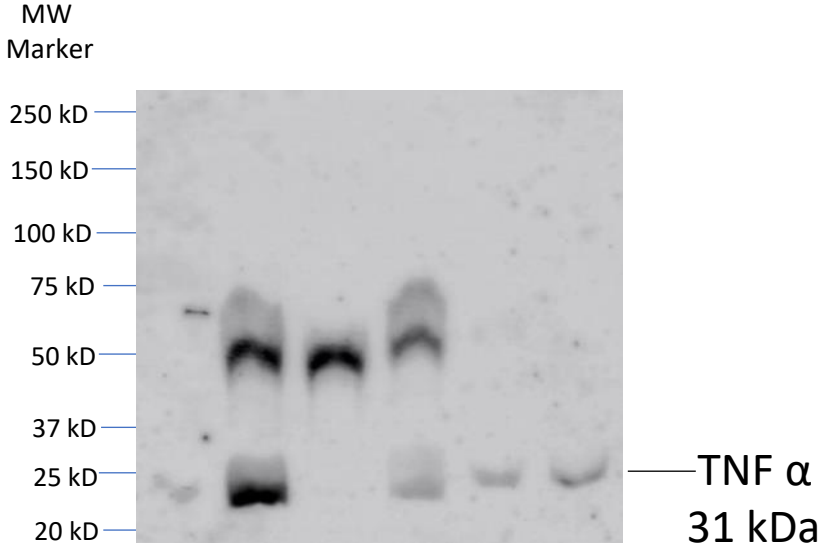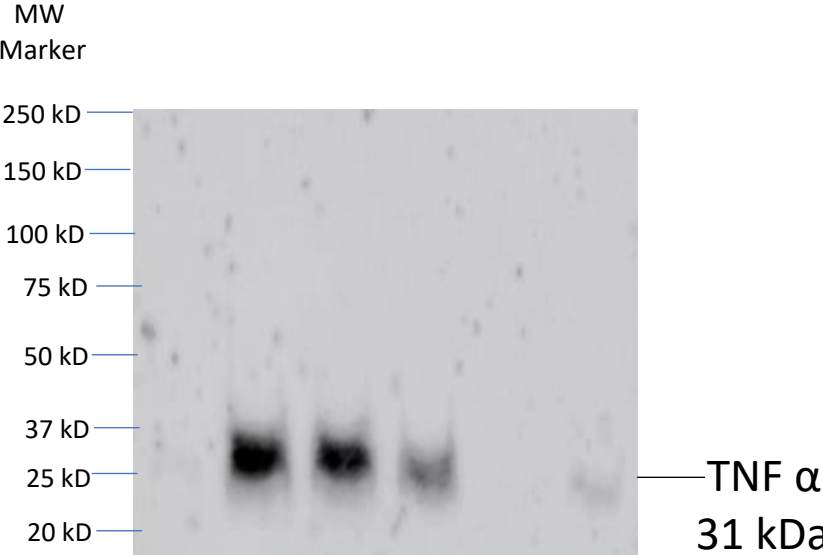



**Figure S5F**  
 **$\beta$ -Actin for TNF  $\alpha$**

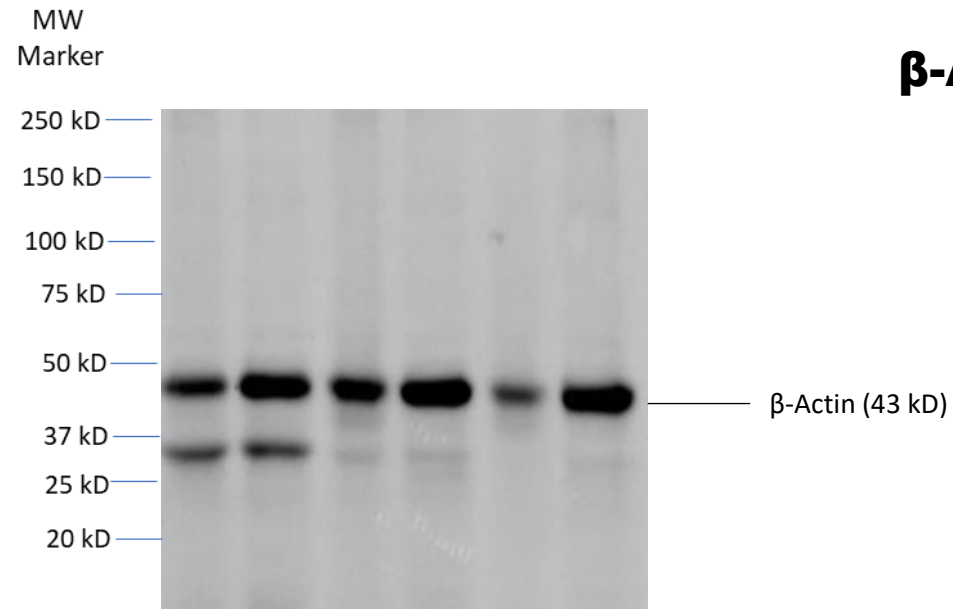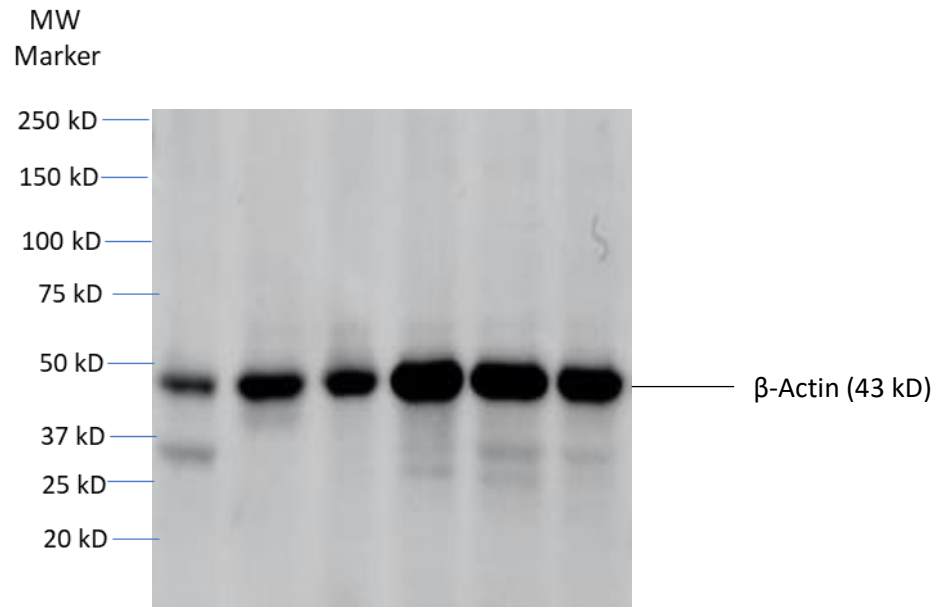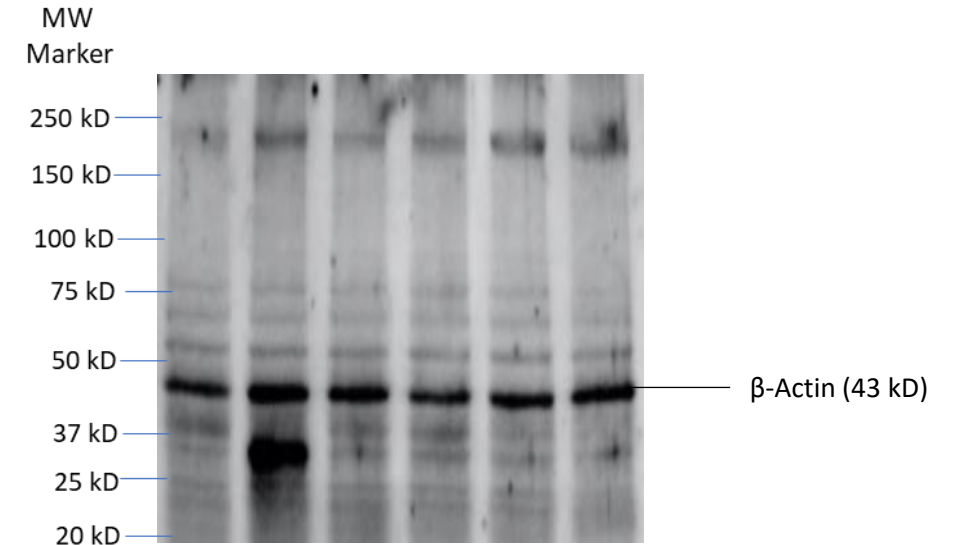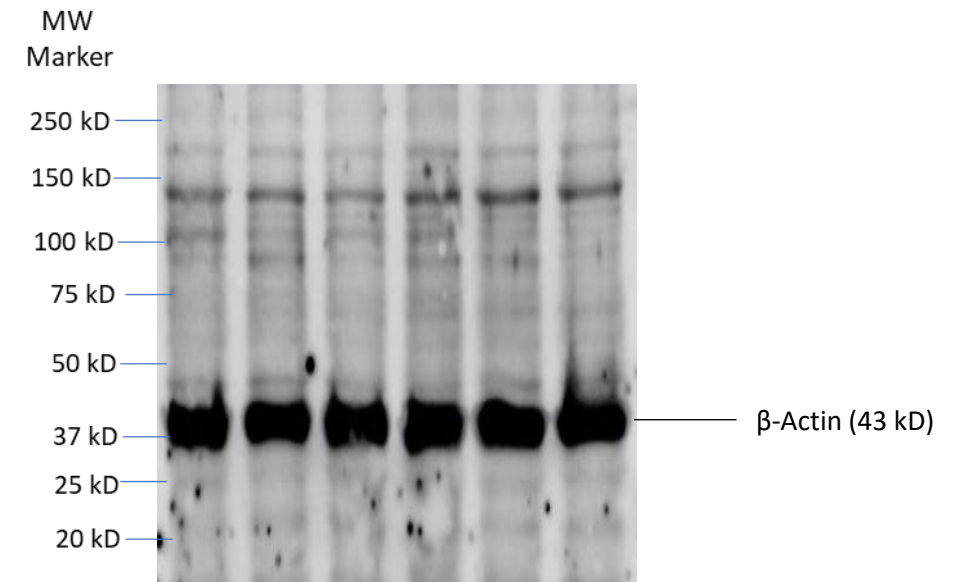

**Figure S6A**

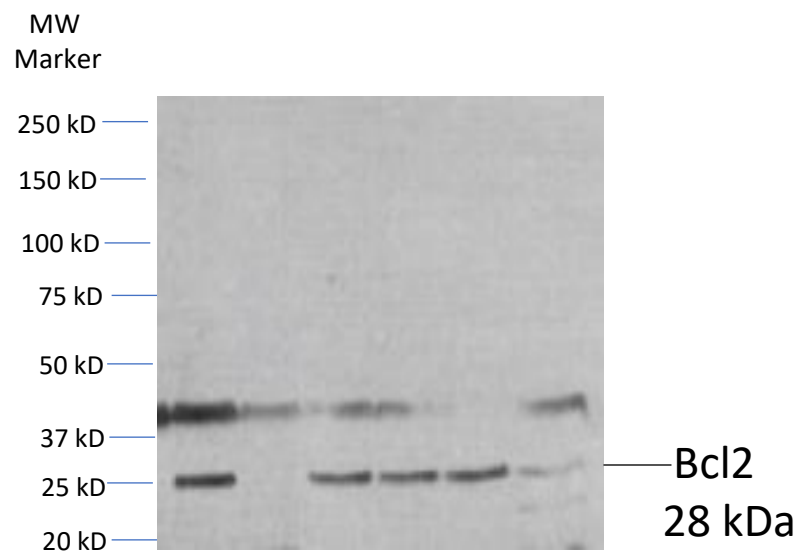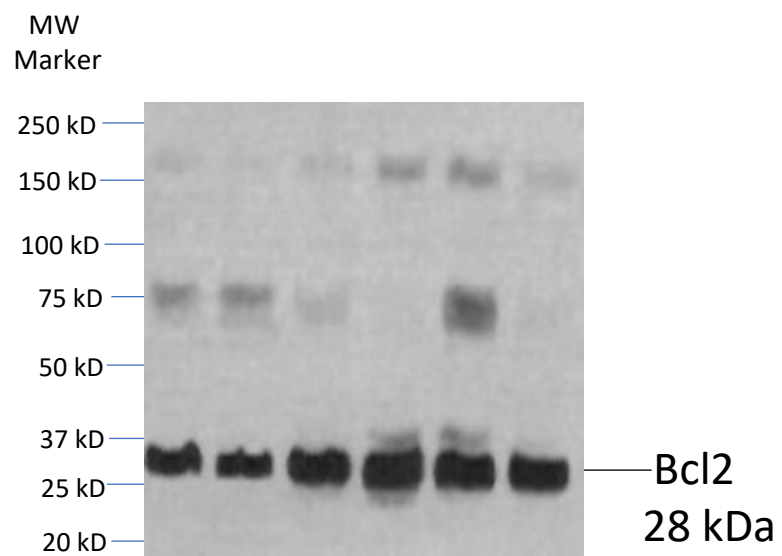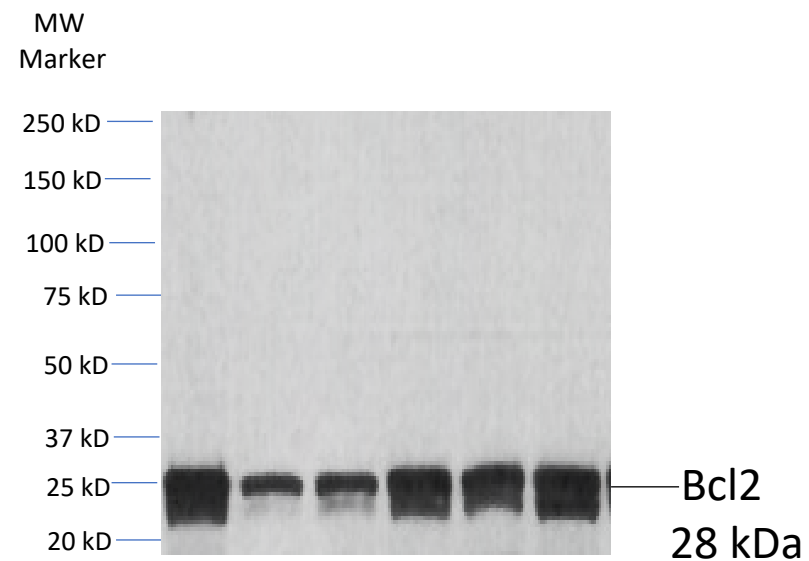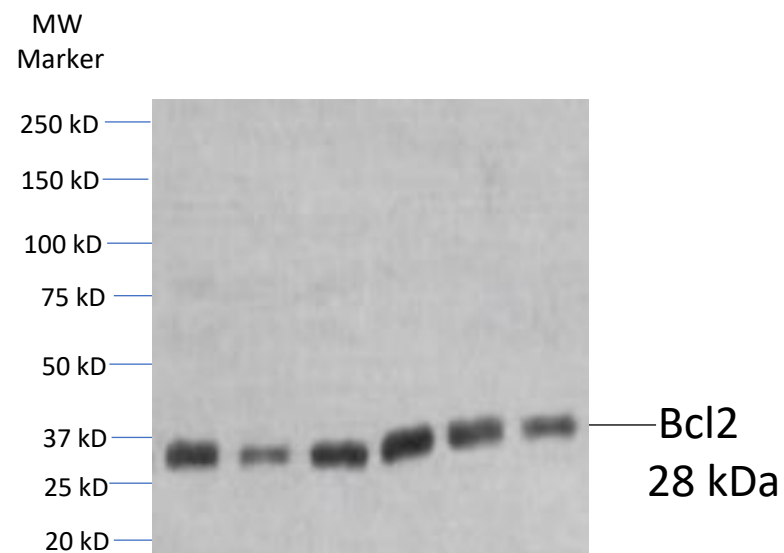

**Figure S6A**

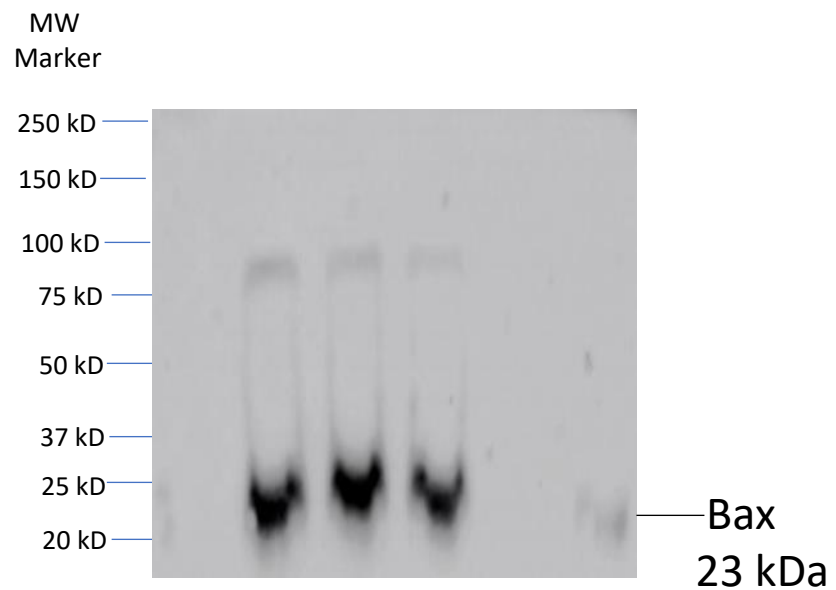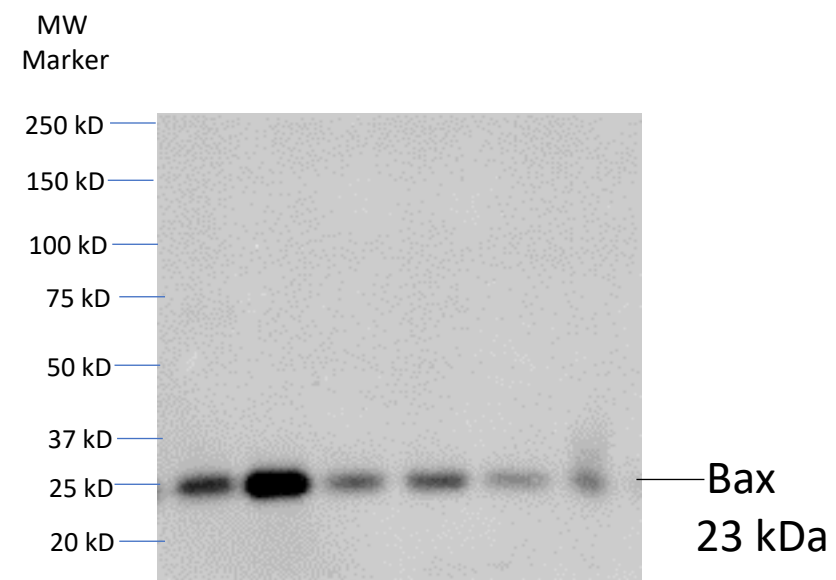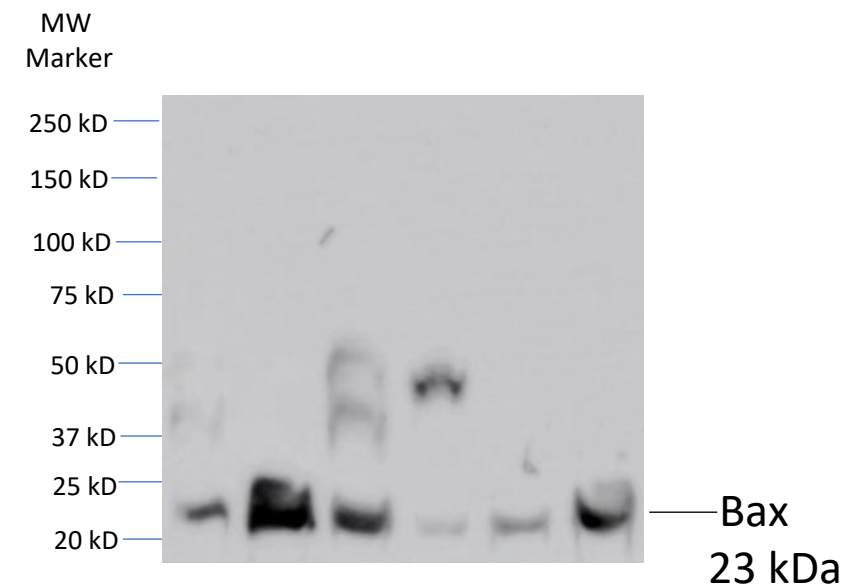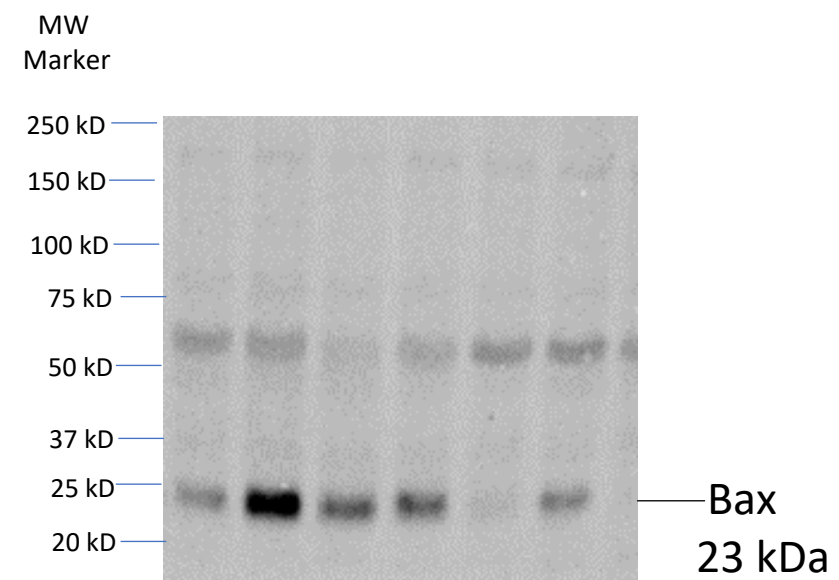

**Figure S6A**

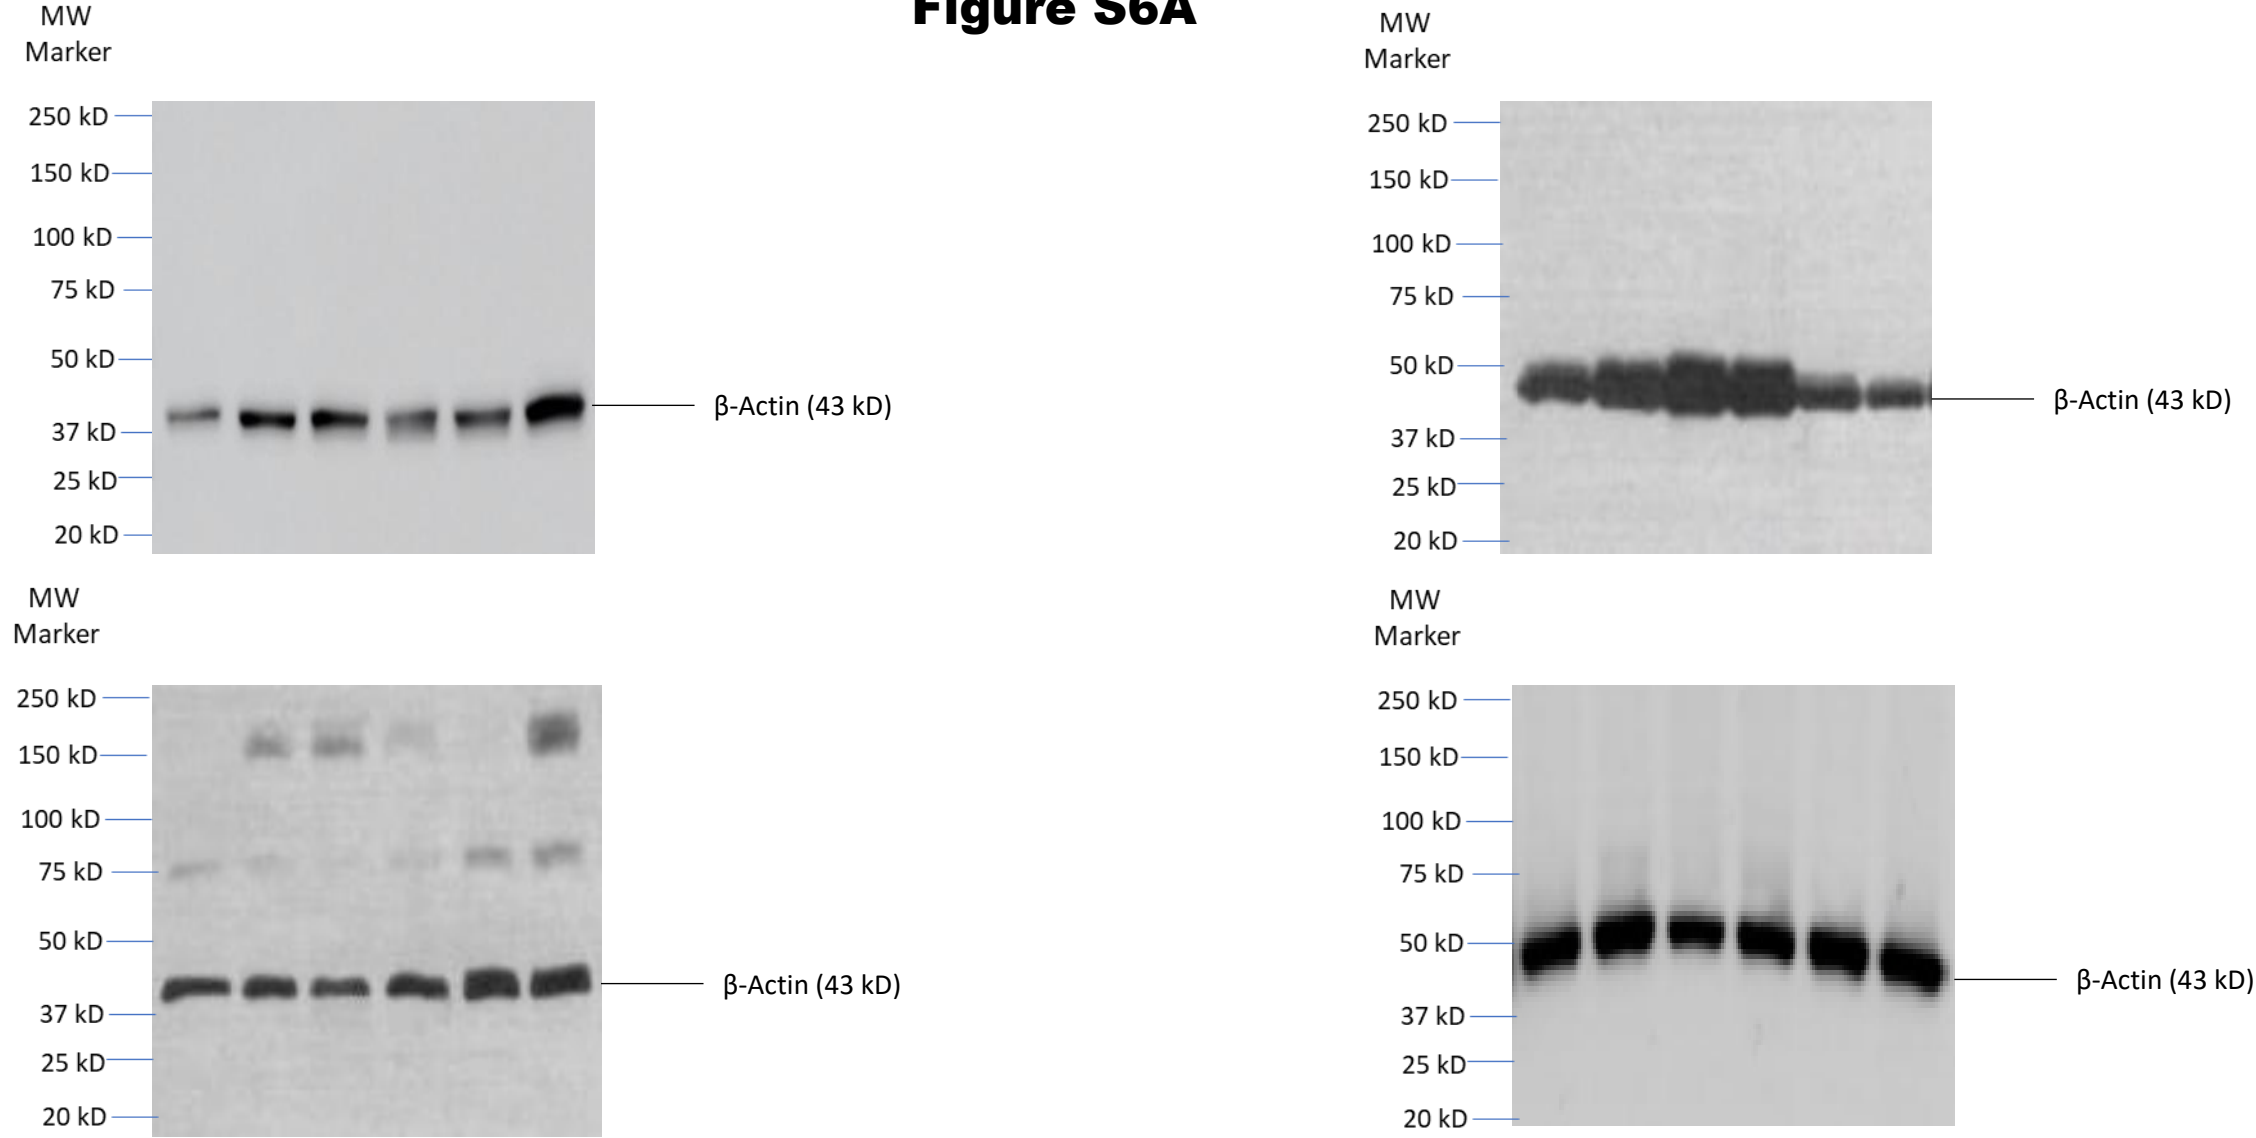

**Figure S6B**

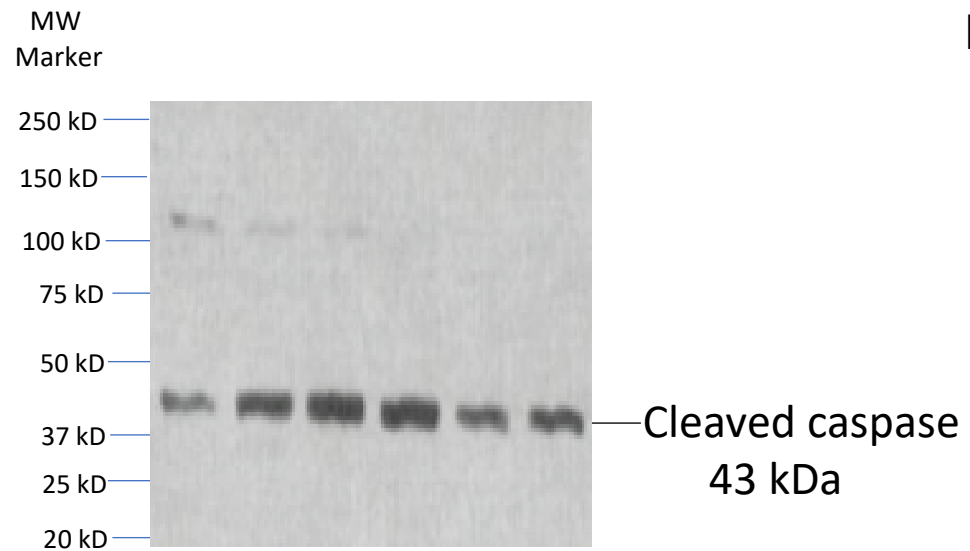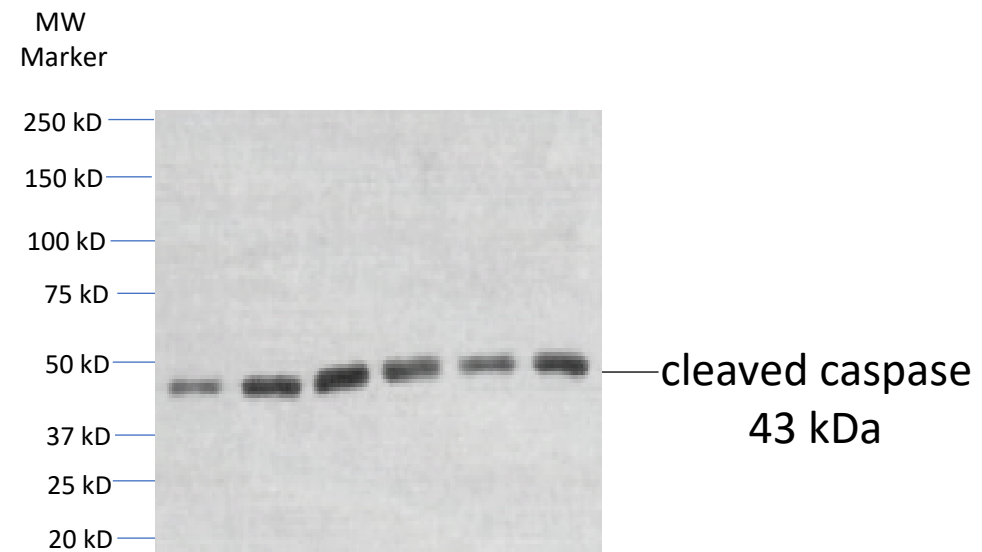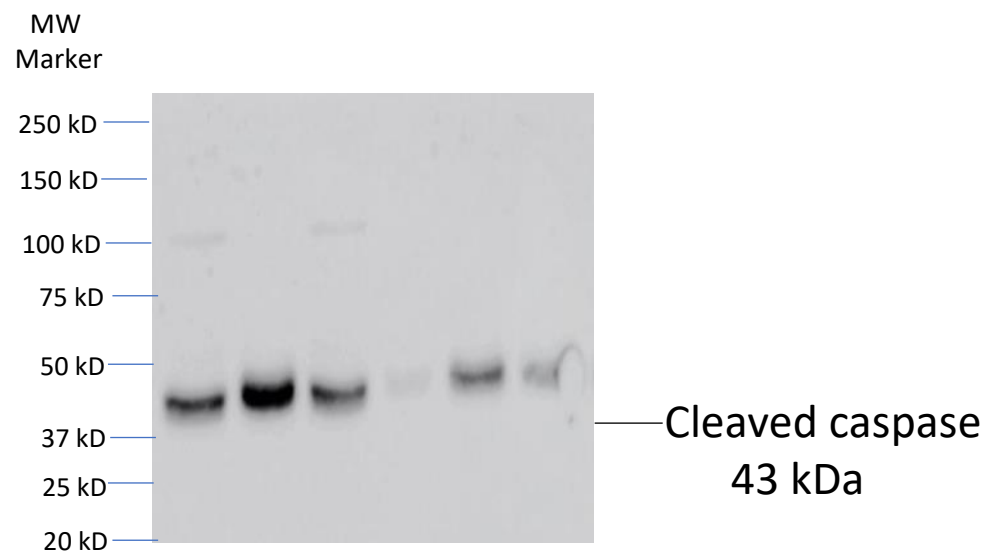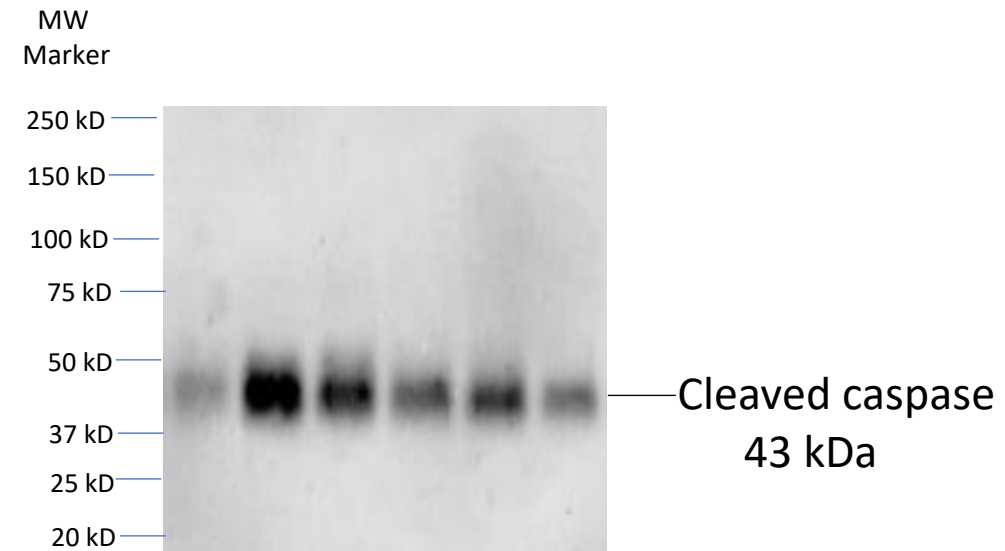

**Figure S6B**

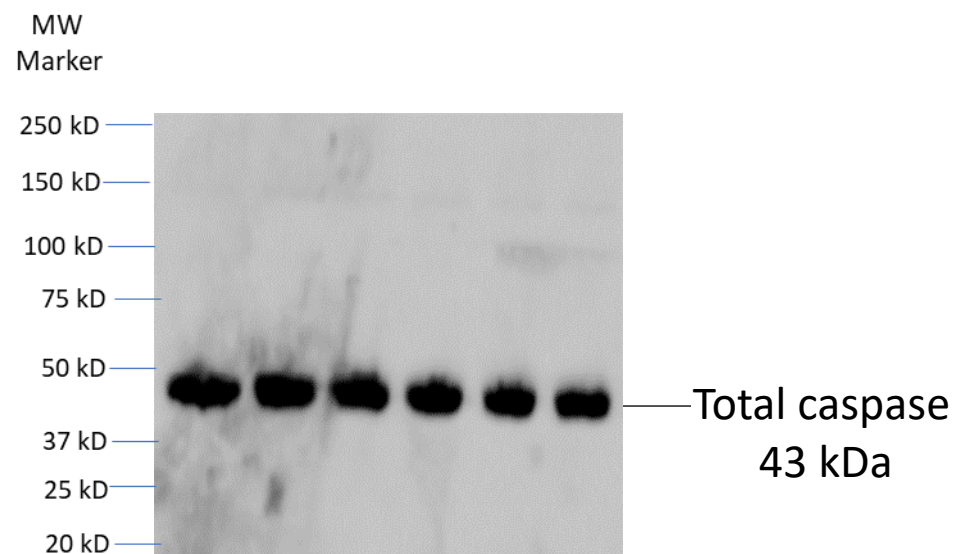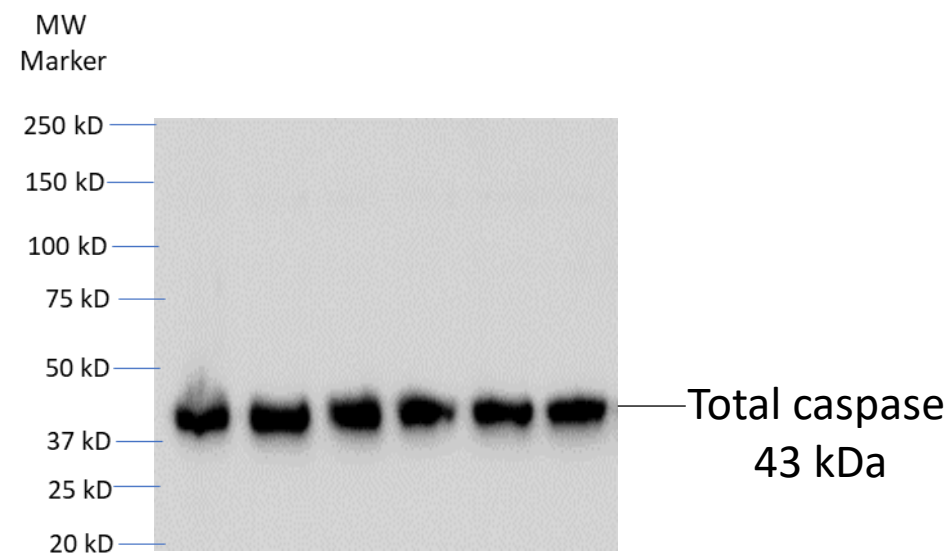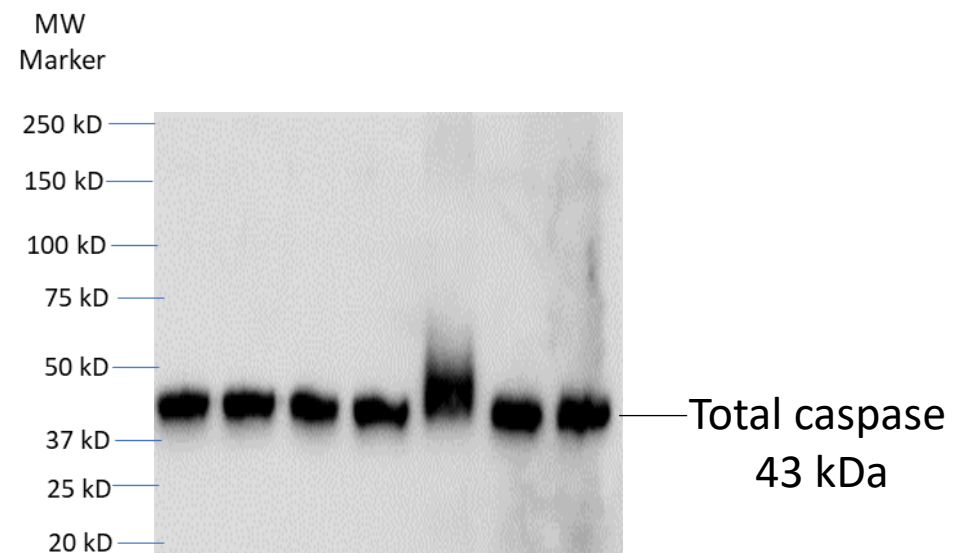

Supplement: s1 [file s1]
